# Supplementary material for: Copper catalyzed direct C–H double methylation of aromatic aldehydes employing methanol as an alkylating agent
Source: Royal Society of Chemistry journal article supplement (doi:10.1039/d4gc02415j), 2024-01-01
Supplement: d4gc02415j1.pdf [file d4gc02415j1.pdf]

Supporting Information

## **Copper Catalyzed Direct C–H Double Methylation of Aromatic Aldehydes Employing Methanol as an Alkylating Agent**

Sereena Sunny and Ramasamy Karvembu\*

Department of Chemistry, National Institute of Technology, Tiruchirappalli-620015, India.

E-mail: [kar@nitt.edu](mailto:kar@nitt.edu)

### **Table of Contents**

|                                                                                    |     |
|------------------------------------------------------------------------------------|-----|
| 1. General Information -----                                                       | S2  |
| 2. General Procedure A-----                                                        | S2  |
| 3. General Procedure B-----                                                        | S4  |
| 4. General Procedure C-----                                                        | S6  |
| 5. Mechanistic Studies-----                                                        | S8  |
| 6. <sup>1</sup> H NMR and <sup>13</sup> C NMR Spectra of Methylated Products ----- | S11 |
| 7. <sup>1</sup> H NMR and <sup>13</sup> C NMR Spectra of Ethylated Products -----  | S22 |
| 8. <sup>1</sup> H NMR and <sup>13</sup> C NMR Spectra of Allylated Products -----  | S29 |
| 9. <sup>1</sup> H NMR Spectra of Deuterium Labelling Study-----                    | S36 |
| 10. HR-MS Spectra of the Products -----                                            | S37 |
| 11. Green Chemistry Metrics-----                                                   | S50 |

## 1. General Information

UV-Visible spectra were recorded on a Shimadzu UV2600 instrument. FT-IR spectra of the compounds were recorded as their KBr pellets (thin film) using a ThermoScientific Nicolet iS5 spectrometer.  $^1\text{H}$  NMR (TMS as the internal standard) and  $^{13}\text{C}$  NMR spectra were recorded on a Bruker 500 MHz spectrometer. Chemical shifts ( $\delta$ ) are reported in ppm and coupling constants ( $J$ ) are in Hertz (Hz). The following abbreviations were used to explain the multiplicities: s = singlet, d = doublet, dd = doublet of doublet, t = triplet, td = triplet of doublet, m = multiplet. Mass spectra were recorded on the Agilent Q-TOF HRMS instrument. Unless otherwise noted, all the reagents were obtained commercially and used without further purification. Hexane for silica gel column chromatography was distilled prior to use. Methanol was dried based on the standard procedure. XploSens PS<sup>TM</sup> peroxides detection strip has been purchased from Sigma.

## 2. General Procedure A

A 10 ml round bottom flask was charged with  $\text{CuSO}_4 \cdot 5\text{H}_2\text{O}$  (0.025 mmol, 5 mol %) in 1 ml methanol. The mixture was stirred for 30 min, then aldehyde (0.5 mmol) was added. Then the reaction mixture was stirred at room temperature for 24 h. Then the solvent was removed under reduced pressure and the crude reaction mixture was purified by silica gel column chromatography (Hexane/EtOAc = 995/5 to 85/15) to obtain the title compounds. Silica gel was neutralized with triethylamine before isolating **3ai**.

### 2-(4-nitrophenyl)propan-2-ol (**3aa**)

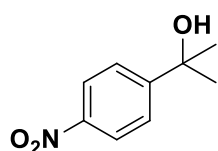

Colourless oil (82 mg, 90 %);  $R_f$  = 0.4 (10 % EtOAc in hexane)

UV-Vis (MeOH):  $\lambda_{\text{max}}$  (nm): 264, 203.  $^1\text{H}$  NMR (500 MHz,  $\text{CDCl}_3$ , ppm):  $\delta$  8.24 - 8.21 (m, 2H), 7.65 - 7.63 (m, 2H), 5.47 (s, 1H), 3.34 (s, 6H).  $^{13}\text{C}$  NMR (126 MHz,  $\text{CDCl}_3$ , ppm):  $\delta$  148.2, 145.2, 128, 123.6, 101.7, 52.9. FT-

IR (Thin film):  $\nu$  3426, 1525, 1346  $\text{cm}^{-1}$ . HR-MS (ESI-TOF):  $m/z$  Calcd. for  $[\text{C}_9\text{H}_{11}\text{NO}_3]$  166.0504 ( $[\text{M}-\text{CH}_3]^+$ ); Found 166.0504.

### 2-(3-nitrophenyl)propan-2-ol (**3ab**)

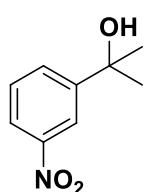

Pale yellow oil (85 mg, 94 %);  $R_f$  = 0.4 (10 % EtOAc in hexane)

UV-Vis (MeOH),  $\lambda_{\text{max}}$  (nm): 260, 204.  $^1\text{H}$  NMR (500 MHz,  $\text{CDCl}_3$ , ppm):  $\delta$  8.32 - 8.31 (m, 1H), 8.18 - 8.16 (m, 1H), 7.78 - 7.76 (m, 1H), 7.54 (t,  $J$  = 7.95 Hz, 1H), 5.46 (s, 1H), 3.33 (s, 6H).  $^{13}\text{C}$  NMR (126 MHz,  $\text{CDCl}_3$ , ppm):  $\delta$  148.3, 140.4, 132.9, 129.3, 123.4, 122.0, 101.5, 52.7. FT-IR (Thin film):  $\nu$  3444, 1531, 1349

$\text{cm}^{-1}$ . HRMS (ESI-TOF):  $m/z$  Calcd. for  $[\text{C}_9\text{H}_{11}\text{NO}_3]$  166.0504 ( $[\text{M}-\text{CH}_3]^+$ ); Found: 166.0504.

### 2-(2-nitrophenyl)propan-2-ol (3ac)

Colourless oil (75 mg, 83 %);  $R_f = 0.4$  (10 % EtOAc in Hexane)

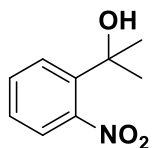

UV-Vis (MeOH),  $\lambda_{\max}$  (nm): 253, 205.  $^1\text{H NMR}$  (500 MHz,  $\text{CDCl}_3$ , ppm):  $\delta$  7.81 - 7.77 (m, 2H), 7.59 (td,  $J = 7.5$ ,  $J = 1$  Hz, 1H), 7.46 (td,  $J = 7.8$ ,  $J = 1.4$  Hz, 1H), 5.91 (s, 1H), 3.39 (s, 6H).  $^{13}\text{C NMR}$  (126 MHz,  $\text{CDCl}_3$ , ppm):  $\delta$  149.3, 133.0, 132.8, 129.7, 128.4, 124.5, 100.2, 54.9. FT-IR (Thin film):  $\nu$  3446, 1532, 1362  $\text{cm}^{-1}$ . HRMS (ESI-TOF):  $m/z$  Calcd. for  $[\text{C}_9\text{H}_{11}\text{NO}_3]$  166.0504 ( $[\text{M}-\text{CH}_3]^+$ ); Found: 166.0505.

### (E)-2-methyl-4-(2-nitrophenyl)but-3-en-2-ol (3ad)

Colourless oil (75 mg, 72 %);  $R_f = 0.3$  (10 % EtOAc in hexane).

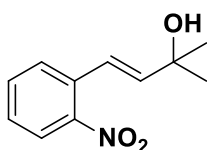

UV-Vis (MeOH),  $\lambda_{\max}$  (nm): 311, 234, 203.  $^1\text{H NMR}$  (500 MHz,  $\text{DMSO}-d_6$ , ppm):  $\delta$  7.97 (dd,  $J = 8.2$ ,  $J = 1.2$  Hz, 1H), 7.82 (dd,  $J = 7.9$ ,  $J = 1.3$  Hz, 1H), 7.57 - 7.54 (m, 1H), 6.98 (d,  $J = 15.8$  Hz, 1H), 6.28 (dd,  $J = 16$ ,  $J = 4.8$  Hz, 1H), 4.99 (dd,  $J = 4.8$ ,  $J = 1.2$  Hz, 1H) 2.5 (s, 6H).  $^{13}\text{C NMR}$  (126 MHz,  $\text{DMSO}-d_6$ , ppm):  $\delta$  148.1, 133.7, 131.4, 130.8, 129.4, 128.8, 127.7, 124.5, 101.9, 52.6. FT-IR (Thin film):  $\nu$  3449, 1525, 1347  $\text{cm}^{-1}$ . HRMS (ESI-TOF):  $m/z$  Calcd. for  $[\text{C}_{11}\text{H}_{13}\text{NO}_3]$  192.0661 ( $[\text{M}-\text{CH}_3]^+$ ); Found: 192.0661.

### 4-(2-hydroxypropan-2-yl)benzotrile (3ae)

Colourless oil (62 mg, 76 %);  $R_f = 0.4$  (10 % EtOAc in Hexane)

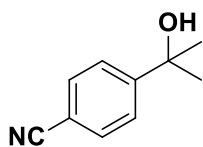

UV-Vis (MeOH),  $\lambda_{\max}$  (nm): 269, 229, 202.  $^1\text{H NMR}$  (500 MHz,  $\text{DMSO}-d_6$ , ppm):  $\delta$  7.84 - 7.82 (m, 2H), 7.57 - 7.55 (m, 2H), 5.45 (s, 1H), 3.25 (s, 6H).  $^{13}\text{C NMR}$  (126 MHz,  $\text{DMSO}-d_6$ , ppm):  $\delta$  143.8, 132.6, 128, 119.1, 111.7, 102.1, 53.2. FT-IR (Thin film):  $\nu$  3421, 2229  $\text{cm}^{-1}$ . HRMS (ESI-TOF):  $m/z$  Calcd. for  $[\text{C}_{10}\text{H}_{11}\text{NO}]$  146.0606 ( $[\text{M}-\text{CH}_3]^+$ ); Found: 146.0607.

### 3-(2-hydroxypropan-2-yl)benzotrile (3af)

Colourless oil (65 mg, 80 %);  $R_f = 0.4$  (10 % EtOAc in Hexane)

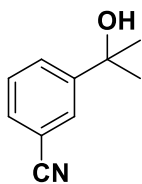

UV-Vis (MeOH),  $\lambda_{\max}$  (nm): 272, 225.  $^1\text{H NMR}$  (500 MHz,  $\text{DMSO}-d_6$ , ppm):  $\delta$  7.84 - 7.82 (m, 1H), 7.78 (s, 1H), 7.72 (d,  $J = 7.85$ , 1H), 7.61 (t,  $J = 7.75$ , 1H), 5.45 (s, 1H), 3.27 (s, 6H).  $^{13}\text{C NMR}$  (126 MHz,  $\text{DMSO}-d_6$ , ppm):  $\delta$  140.2, 132.8, 131.9, 130.5, 130.0, 119.0, 111.7, 101.9, 53.2. FT-IR (Thin film):  $\nu$  3380, 2230  $\text{cm}^{-1}$ . HRMS (ESI-TOF):  $m/z$  Calcd. for  $[\text{C}_{10}\text{H}_{11}\text{NO}]$  146.0606 ( $[\text{M}-\text{CH}_3]^+$ ); Found: 146.0603.

### 2-(2-chloro-5-nitrophenyl)propan-2-ol (3ag)

Yellow oil (74 mg, 68 %);  $R_f = 0.5$  (10 % EtOAc in Hexane)

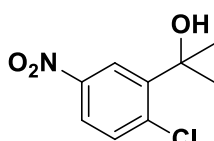

UV-Vis (MeOH),  $\lambda_{\max}$  (nm): 270, 203.  $^1\text{H NMR}$  (500 MHz,  $\text{DMSO}-d_6$ , ppm):  $\delta$  8.26 (d,  $J = 2.85$ , 1H), 8.21 (dd,  $J = 8.75$ ,  $J = 2.85$  Hz, 1H), 7.77 (d,  $J = 8.75$  Hz, 1H), 5.61 (s, 1H), 3.34 (s, 6H).  $^{13}\text{C NMR}$  (126 MHz,  $\text{DMSO}-d_6$ , ppm):  $\delta$  146.7,

139.4, 137.5, 131.7, 125.4, 123.1, 99.9, 54.2. FT-IR (Thin film):  $\nu$  3449, 1526, 1348  $\text{cm}^{-1}$ . HRMS (ESI-TOF):  $m/z$  Calcd. for  $[\text{C}_9\text{H}_{10}\text{ClNO}_3]$  200.0114 ( $[\text{M}-\text{CH}_3]^+$ ); Found: 200.0111

### 2-(4-(methylthio)phenyl)propan-2-ol (3ai)

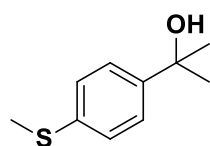

Colourless oil (71 mg, 78 %);  $R_f$  = 0.5 (10 % EtOAc in Hexane)

UV-Vis (MeOH),  $\lambda_{\text{max}}$  (nm): 258, 210.  $^1\text{H}$  NMR (500 MHz,  $\text{DMSO}-d_6$ , ppm):  $\delta$  7.33 - 7.31 (m, 2H), 7.27 - 7.25 (m, 2H), 5.35 (s, 1H), 3.23 (s, 6H), 2.47 (s, 3H).  $^{13}\text{C}$  NMR (126 MHz,  $\text{DMSO}-d_6$ , ppm):  $\delta$  138.8, 135.2, 127.5, 125.8, 102.7, 52.8, 14.9. FT-IR (Thin film):  $\nu$  3446  $\text{cm}^{-1}$ . HRMS (ESI-TOF):  $m/z$  Calcd. for  $[\text{C}_{10}\text{H}_{14}\text{OS}]$  167.0531 ( $[\text{M}-\text{CH}_3]^+$ ); Found: 167.0535.

### 2-(naphthalen-1-yl)propan-2-ol (3ak)

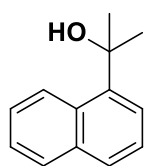

Pale yellow oil (56 mg, 60 %);  $R_f$  = 0.7 (10 % EtOAc in Hexane)

UV-Vis (MeOH),  $\lambda_{\text{max}}$  (nm): 280, 217.  $^1\text{H}$  NMR (500 MHz,  $\text{DMSO}-d_6$ , ppm):  $\delta$  8.26 - 8.24 (m, 1H), 7.96 - 7.92 (m, 2H), 7.67 - 7.66 (m, 1H), 7.57 - 7.50 (m, 3H), 5.92 (s, 1H), 3.31 (s, 6H).  $^{13}\text{C}$  NMR (126 MHz,  $\text{DMSO}-d_6$ , ppm):  $\delta$  133.8, 133.7, 130.7, 129.4, 128.8, 126.5, 126.1, 125.3, 125.1, 124.8, 102.7, 53.6. FT-IR (Thin film):  $\nu$  3444,  $\text{cm}^{-1}$ . HRMS (ESI-TOF):  $m/z$  Calcd. for  $[\text{C}_{13}\text{H}_{14}\text{O}]$  171.0810 ( $[\text{M}-\text{CH}_3]^+$ ); Found: 171.0813.

### 2-(5-nitrofuran-2-yl)propan-2-ol (3al)

Yellow oil (46 mg, 54 %);  $R_f$  = 0.3 (10 % EtOAc in Hexane)

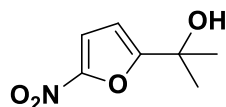

UV-Vis (MeOH),  $\lambda_{\text{max}}$  (nm): 305, 227, 200.  $^1\text{H}$  NMR (500 MHz,  $\text{DMSO}-d_6$ , ppm):  $\delta$  7.68 (d,  $J$  = 3.75, 1H), 6.86 - 6.85 (m, 1H), 5.59 (s, 1H), 3.33 (s, 6H).  $^{13}\text{C}$  NMR (126 MHz,  $\text{DMSO}-d_6$ , ppm):  $\delta$  154.3, 151.6, 113.4, 112.5, 96.7, 53.3. FT-IR (Thin film):  $\nu$  3448, 1535, 1355  $\text{cm}^{-1}$ . HRMS (ESI-TOF):  $m/z$  Calcd. for  $[\text{C}_7\text{H}_9\text{NO}_4]$  156.0297 ( $[\text{M}-\text{CH}_3]^+$ ); Found: 156.0296.

### 3-(2-hydroxypropan-2-yl)benzoic acid (3an)

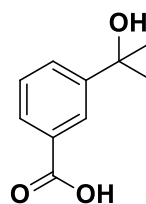

White solid (59 mg, 65 %);  $R_f$  = 0.4 (25 % EtOAc in Hexane)

UV-Vis (MeOH),  $\lambda_{\text{max}}$  (nm): 255, 217.  $^1\text{H}$  NMR (500 MHz,  $\text{DMSO}-d_6$ , ppm):  $\delta$  13.03 (bs, 1H), 7.99 (s, 1H), 7.94 - 7.93 (m, 1H), 7.62 (d,  $J$  = 7.65, 1H), 7.52 (t,  $J$  = 7.65, 1H), 5.46 (s, 1H), 3.26 (s, 6H).  $^{13}\text{C}$  NMR (126 MHz,  $\text{DMSO}-d_6$ , ppm):  $\delta$  167.6, 139.1, 131.4, 131.1, 129.7, 127.8, 102.5, 53.0. FT-IR (Thin film):  $\nu$  3433, 1693  $\text{cm}^{-1}$ . HRMS (ESI-TOF):  $m/z$  Calcd. for  $[\text{C}_{10}\text{H}_{12}\text{O}_3]$  165.0552 ( $[\text{M}-\text{CH}_3]^+$ ); Found: 165.0556.

## 3. General Procedure B

A 10 ml round bottom flask was charged with  $\text{CuSO}_4 \cdot 5\text{H}_2\text{O}$  (0.025 mmol, 5 mol %) in 1 ml ethanol. The mixture was stirred for 30 min, then aldehyde (0.5 mmol) was added. Then the reaction mixture was stirred at room temperature for 24 h. Then the solvent was removed under

reduced pressure and the crude reaction mixture was purified by silica gel column chromatography (Hexane/EtOAc = 995/5 to 99/1) to obtain the title compounds. Silica gel was neutralized with triethylamine before isolating **4af**.

### 3-(4-nitrophenyl)pentan-3-ol (**4aa**)

Colourless oil (93 mg, 89 %);  $R_f = 0.5$  (10 % EtOAc in Hexane)

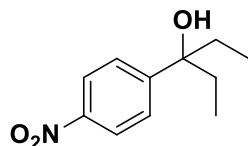

UV-Vis (MeOH),  $\lambda_{\max}$  (nm): 265, 203.  $^1\text{H}$  NMR (500 MHz, DMSO- $d_6$ , ppm):  $\delta$  8.26 - 8.23 (m, 2H), 7.69 - 7.66 (m, 2H), 5.63 (s, 1H), 3.60 - 3.50 (m, 4H), 1.16 (t,  $J = 7.1$  Hz, 6H).  $^{13}\text{C}$  NMR (126 MHz, DMSO- $d_6$ , ppm):  $\delta$  147.9, 146.9, 128.4, 123.9, 100.3, 61.8, 15.7. FT-IR (Thin film):  $\nu$  3427, 1524, 1346  $\text{cm}^{-1}$ . HRMS (ESI-TOF):  $m/z$  Calcd. for  $[\text{C}_{11}\text{H}_{15}\text{NO}_3]$  180.0661 ( $[\text{M}-\text{CH}_2\text{CH}_3]^+$ ); Found: 180.0658.

### 3-(3-nitrophenyl)pentan-3-ol (**4ab**)

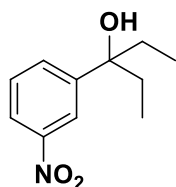

Colourless oil (95 mg, 90 %);  $R_f = 0.5$  (10 % EtOAc in Hexane)  
UV-Vis (MeOH),  $\lambda_{\max}$  (nm): 261, 203.  $^1\text{H}$  NMR (500 MHz, DMSO- $d_6$ , ppm):  $\delta$  8.22 - 8.20 (m, 2H), 7.86 - 7.84 (m, 1H), 7.71 - 7.68 (m, 1H), 5.65 (s, 1H), 3.61 - 3.50 (m, 4H), 1.16 (t,  $J = 7.05$  Hz, 6H).  $^{13}\text{C}$  NMR (126 MHz, DMSO- $d_6$ , ppm):  $\delta$  147.7, 141.5, 133.1, 129.8, 123.2, 121.0, 99.6, 61.2, 15.1. FT-IR (Thin film):  $\nu$  3447, 1531, 1349  $\text{cm}^{-1}$ . HRMS (ESI-TOF):  $m/z$  Calcd. for  $[\text{C}_{11}\text{H}_{15}\text{NO}_3]$  180.0661 ( $[\text{M}-\text{CH}_2\text{CH}_3]^+$ ); Found: 180.0661.

### 3-(2-nitrophenyl)pentan-3-ol (**4ac**)

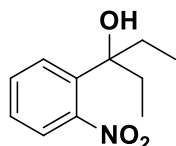

Pale yellow oil (45 mg, 43 %);  $R_f = 0.55$  (10 % EtOAc in Hexane)  
UV-Vis (MeOH),  $\lambda_{\max}$  (nm): 252, 203.  $^1\text{H}$  NMR (500 MHz, DMSO- $d_6$ , ppm):  $\delta$  7.88 - 7.86 (m, 1H), 7.74 - 7.70 (m, 2H), 7.62 - 7.59 (m, 1H), 5.89 (s, 1H), 3.65 - 3.50 (m, 4H), 1.13 (t,  $J = 7.05$  Hz, 6H).  $^{13}\text{C}$  NMR (126 MHz, DMSO- $d_6$ , ppm):  $\delta$  149.2, 133.1, 130.2, 128.1, 124.4, 98.2, 63.2, 15.4. FT-IR (Thin film):  $\nu$  3448, 1532, 1361  $\text{cm}^{-1}$ . HRMS (ESI-TOF):  $m/z$  Calcd. for  $[\text{C}_{11}\text{H}_{15}\text{NO}_3]$  180.0661 ( $[\text{M}-\text{CH}_2\text{CH}_3]^+$ ); Found: 180.0660.

### 4-(3-hydroxypentan-3-yl)benzotrile (**4ad**)

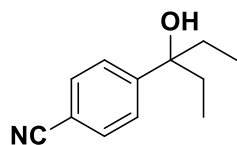

Colourless oil (57 mg, 60 %);  $R_f = 0.5$  (10 % EtOAc in Hexane)  
UV-Vis (MeOH),  $\lambda_{\max}$  (nm): 271, 230, 201.  $^1\text{H}$  NMR (500 MHz, DMSO- $d_6$ , ppm):  $\delta$  7.84 - 7.83 (m, 2H), 7.59 - 7.57 (m, 2H), 5.56 (s, 1H), 3.57 - 3.46 (m, 4H), 1.14 (t,  $J = 7.05$  Hz, 6H).  $^{13}\text{C}$  NMR (126 MHz, DMSO- $d_6$ , ppm):  $\delta$  144.8, 132.5, 127.8, 119.0, 111.4, 100.3, 61.5, 15.4. FT-IR (Thin film):  $\nu$  3420, 2229  $\text{cm}^{-1}$ . HRMS (ESI-TOF):  $m/z$  Calcd. for  $[\text{C}_{11}\text{H}_{15}\text{NO}]$  160.0762 ( $[\text{M}-\text{CH}_2\text{CH}_3]^+$ ); Found: 160.0763.

### 3-(2-chloro-5-nitrophenyl)pentan-3-ol (**4ae**)

Pale yellow oil (49 mg, 40 %);  $R_f = 0.6$  (10 % EtOAc in Hexane)

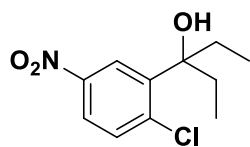

UV-Vis (MeOH),  $\lambda_{\max}$  (nm): 269, 204.  $^1\text{H}$  NMR (500 MHz, DMSO- $d_6$ , ppm):  $\delta$  8.30 - 8.29 (m, 1H), 8.23 - 8.21 (m, 1H), 7.78 - 7.77 (m, 1H), 5.72 (s, 1H), 3.70 - 3.56 (m, 4H), 1.16 (t,  $J = 7.05$  Hz, 6H).  $^{13}\text{C}$  NMR (126 MHz, DMSO- $d_6$ , ppm):  $\delta$  146.8, 139.4, 138.6, 131.7, 125.3, 122.9, 98.2, 62.7, 15.5. FT-IR (Thin film):  $\nu$  3446, 1528, 1347  $\text{cm}^{-1}$ . HRMS (ESI-TOF):  $m/z$  Calcd. for  $[\text{C}_{11}\text{H}_{14}\text{ClNO}_3]$  214.0271 ( $[\text{M}-\text{CH}_2\text{CH}_3]^+$ ); Found: 214.0270.

### 3-(3-hydroxy-3-ethylphenyl)benzonitrile (4af)

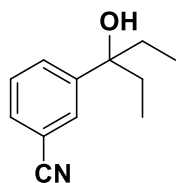

Colourless oil (59 mg, 62 %);  $R_f = 0.4$  (10 % EtOAc in Hexane)

UV-Vis (MeOH),  $\lambda_{\max}$  (nm): 272, 225.  $^1\text{H}$  NMR (500 MHz, DMSO- $d_6$ , ppm):  $\delta$  7.82 - 7.79 (m, 2H), 7.74 - 7.73 (m, 1H), 7.60 (t,  $J = 7.75$  Hz, 1H), 5.55 (s, 1H), 3.58 - 3.47 (m, 4H), 1.16 (t,  $J = 7.05$  Hz, 6H).  $^{13}\text{C}$  NMR (126 MHz, DMSO- $d_6$ , ppm):  $\delta$  141.3, 132.5, 131.7, 130.4, 129.9, 119.1, 111.7, 100.2, 61.7, 15.5. FT-IR (Thin film):  $\nu$  3380, 2230  $\text{cm}^{-1}$ . HRMS (ESI-TOF):  $m/z$  Calcd. for  $[\text{C}_{11}\text{H}_{15}\text{NO}]$  160.0762 ( $[\text{M}-\text{CH}_2\text{CH}_3]^+$ ); Found: 160.0757.

### 3-(4-(methylthio)phenyl)pentan-3-ol (4ag)

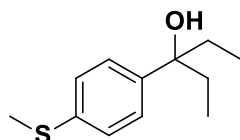

Colourless oil (51 mg, 48 %);  $R_f = 0.6$  (10 % EtOAc in Hexane)

UV-Vis (MeOH),  $\lambda_{\max}$  (nm): 258, 210.  $^1\text{H}$  NMR (500 MHz, DMSO- $d_6$ , ppm):  $\delta$  7.34 - 7.32 (m, 2H), 7.26 - 7.24 (m, 2H), 5.45 (s, 1H), 3.56 - 3.43 (m, 4H), 2.47 (s, 3H), 1.14 (t,  $J = 7.05$  Hz, 6H).  $^{13}\text{C}$  NMR (126 MHz, DMSO- $d_6$ , ppm):  $\delta$  138.5, 136.3, 127.4, 125.9, 101.0, 61.0, 15.5, 15.0. FT-IR (Thin film):  $\nu$  3434  $\text{cm}^{-1}$ . HRMS (ESI-TOF):  $m/z$  Calcd. for  $[\text{C}_{12}\text{H}_{18}\text{OS}]$  181.0687 ( $[\text{M}-\text{CH}_2\text{CH}_3]^+$ ); Found: 181.0688.

## 4. General Procedure C

A 10 ml round bottom flask was charged with  $\text{CuSO}_4 \cdot 5\text{H}_2\text{O}$  (0.025 mmol, 5 mol %) in 1 ml allyl alcohol. The mixture was stirred for 30 min, then aldehyde (0.5 mmol) was added. Then the reaction mixture was stirred at room temperature for 24 h. Then the solvent was removed under reduced pressure and the crude reaction mixture was purified by silica gel column chromatography (Hexane/EtOAc = 995/5 to 99/1) to obtain the title compounds. Silica gel was neutralized with triethylamine before isolating **4aa-4ag**.

### 4-(4-nitrophenyl)hepta-1,6-dien-4-ol (5aa)

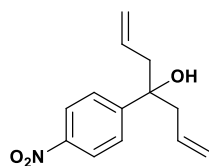

Yellow oil (108 mg, 92 %);  $R_f = 0.5$  (10 % EtOAc in Hexane)

UV-Vis (MeOH),  $\lambda_{\max}$  (nm): 265, 211.  $^1\text{H}$  NMR (500 MHz, DMSO- $d_6$ , ppm):  $\delta$  8.26 - 8.25 (m, 2H), 7.72 - 7.70 (m, 2H), 5.97 - 5.90 (m, 1H), 5.74 (s, 1H), 5.33 - 5.28 (m, 2H), 5.18 - 5.16 (m, 2H), 4.08 - 4.07 (m, 4H).  $^{13}\text{C}$  NMR (126 MHz, DMSO- $d_6$ , ppm):  $\delta$  147.9, 146.1, 134.9, 128.3, 123.9, 117.1, 99.8, 67.0. FT-IR (Thin film):  $\nu$  3428, 1524, 1347  $\text{cm}^{-1}$ . HRMS (ESI-TOF):  $m/z$  Calcd. for  $[\text{C}_{13}\text{H}_{15}\text{NO}_3]$  192.0661 ( $[\text{M}-\text{CH}_2\text{CH}=\text{CH}_2]^+$ ); Found: 192.0656.

#### 4-(3-nitrophenyl)hepta-1,6-dien-4-ol (5ab)

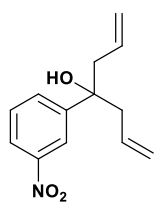

Pale yellow oil (100 mg, 85 %);  $R_f$  = 0.5 (10 % EtOAc in Hexane)

UV-Vis (MeOH),  $\lambda_{\max}$  (nm): 261, 210.  $^1\text{H}$  NMR (500 MHz, DMSO- $d_6$ , ppm):  $\delta$  8.24 - 8.22 (m, 2H), 7.89 - 7.88 (m, 1H), 7.73 - 7.70 (m, 1H), 5.98 - 5.91 (m, 1H), 5.77 (s, 1H), 5.33 - 5.29 (m, 2H), 5.18 - 5.16 (m, 2H), 4.09 - 4.08 (m, 4H).

$^{13}\text{C}$  NMR (126 MHz, DMSO- $d_6$ , ppm):  $\delta$  148.2, 141.3, 135.0, 133.6, 130.4, 123.8, 121.5, 117.1, 99.6, 67.0. FT-IR (Thin film):  $\nu$  3445, 1531, 1349  $\text{cm}^{-1}$ . HRMS (ESI-TOF):  $m/z$  Calcd. for  $[\text{C}_{13}\text{H}_{15}\text{NO}_3]$  192.0661 ( $[\text{M}-\text{CH}_2\text{CH}=\text{CH}_2]^+$ ); Found: 192.0655.

#### 4-(2-chloro-5-nitrophenyl)hepta-1,6-dien-4-ol (5ac)

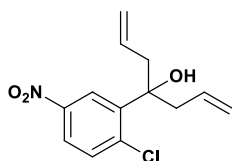

Colourless oil (54 mg, 40 %);  $R_f$  = 0.6 (10 % EtOAc in Hexane)

UV-Vis (MeOH),  $\lambda_{\max}$  (nm): 270, 210.  $^1\text{H}$  NMR (500 MHz, DMSO- $d_6$ , ppm):  $\delta$  8.35 (d,  $J$  = 2.85 Hz, 1H), 8.24 (dd,  $J$  = 2.9 Hz,  $J$  = 8.75 Hz, 1H), 7.79 (d,  $J$  = 8.8 Hz, 1H), 5.97 - 5.89 (m, 1H), 5.84 (s, 1H), 5.32 - 5.28 (m,

2H), 5.19 - 5.16 (m, 2H), 4.15 - 4.14 (m, 4H).  $^{13}\text{C}$  NMR (126 MHz, DMSO- $d_6$ , ppm):  $\delta$  146.7, 139.4, 138.1, 134.7, 131.7, 125.4, 123.1, 117.5, 97.5, 67.9. FT-IR (Thin film):  $\nu$  3442, 1528, 1347  $\text{cm}^{-1}$ . HRMS (ESI-TOF):  $m/z$  Calcd. for  $[\text{C}_{13}\text{H}_{14}\text{ClNO}_3]$  226.0271 ( $[\text{M}-\text{CH}_2\text{CH}=\text{CH}_2]^+$ ); Found: 226.0272.

#### 4-(4-hydroxyhepta-1,6-dien-4-yl)benzotrile (5ad)

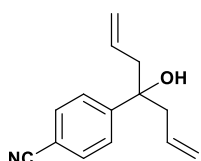

Colourless oil (64 mg, 60 %);  $R_f$  = 0.5 (10 % EtOAc in Hexane)

UV-Vis (MeOH),  $\lambda_{\max}$  (nm): 271, 229.  $^1\text{H}$  NMR (500 MHz, DMSO- $d_6$ , ppm):  $\delta$  7.88 - 7.86 (m, 2H), 7.63 - 7.62 (m, 2H), 5.97 - 5.89 (m, 1H), 5.69 (s, 1H), 5.32 - 5.27 (m, 2H), 5.18 - 5.15 (m, 2H), 4.07 - 4.05 (m, 4H).  $^{13}\text{C}$  NMR (126

MHz, DMSO- $d_6$ , ppm):  $\delta$  144.2, 135.0, 132.7, 127.9, 119.1, 117.0, 111.7, 100.0, 66.9. FT-IR (Thin film):  $\nu$  3421, 2229  $\text{cm}^{-1}$ . HRMS (ESI-TOF):  $m/z$  Calcd. for  $[\text{C}_{14}\text{H}_{15}\text{NO}]$  172.0762 ( $[\text{M}-\text{CH}_2\text{CH}=\text{CH}_2]^+$ ); Found: 172.0760.

#### 3-(4-hydroxyhepta-1,6-dien-4-yl)benzotrile (5ae)

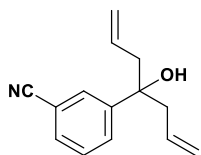

Colourless oil (48 mg, 45 %);  $R_f$  = 0.4 (10 % EtOAc in Hexane)

UV-Vis (MeOH),  $\lambda_{\max}$  (nm): 272, 224.  $^1\text{H}$  NMR (500 MHz, DMSO- $d_6$ , ppm):  $\delta$  7.85 - 7.83 (m, 2H), 7.78 - 7.76 (m, 1H), 7.64 - 7.61 (m, 1H), 5.97 - 5.90 (m, 1H), 5.67 (s, 1H), 5.32 - 5.28 (m, 2H), 5.18 - 5.15 (m, 2H), 4.07 - 4.05

(m, 4H).  $^{13}\text{C}$  NMR (126 MHz, DMSO- $d_6$ , ppm):  $\delta$  140.7, 135.0, 132.8, 131.8, 130.5, 130.9, 119.0, 117.0, 111.8, 99.8, 66.9. FT-IR (Thin film):  $\nu$  3458, 2230  $\text{cm}^{-1}$ . HRMS (ESI-TOF):  $m/z$  Calcd. for  $[\text{C}_{14}\text{H}_{15}\text{NO}]$  172.0762 ( $[\text{M}-\text{CH}_2\text{CH}=\text{CH}_2]^+$ ); Found: 172.0756.

#### 4-(4-(methylthio)phenyl)hepta-1,6-dien-4-ol (5af)

Colourless oil (82 mg, 70 %);  $R_f$  = 0.8 (10 % EtOAc in Hexane)

UV-Vis (MeOH),  $\lambda_{\max}$  (nm): 259, 210.  $^1\text{H}$  NMR (500 MHz, DMSO- $d_6$ , ppm):  $\delta$  7.38 - 7.36 (m, 2H), 7.28 - 7.27 (m, 2H), 5.96 - 5.89 (m, 1H), 5.58 (s, 1H), 5.31 - 5.27 (m, 2H), 5.16 - 5.13 (m, 2H), 4.03 - 4.02 (m, 4H), 2.48 (s, 3H).  $^{13}\text{C}$  NMR (126 MHz, DMSO- $d_6$ , ppm):  $\delta$  138.9, 135.6, 135.3, 127.5, 125.9, 116.7, 100.5, 66.47, 15.0. FT-IR (Thin film):  $\nu$  3425  $\text{cm}^{-1}$ . HRMS (ESI-TOF):  $m/z$  Calcd. for  $[\text{C}_{14}\text{H}_{18}\text{OS}]$  193.0687 ( $[\text{M}-\text{CH}_2\text{CH}=\text{CH}_2]^+$ ); Found: 193.0683.

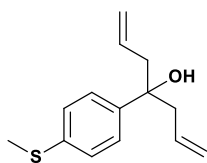

#### (E)-4-(2-nitrostyryl)hepta-1,6-dien-4-ol (5af)

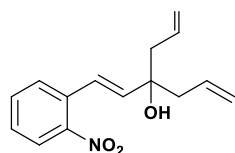

Pale yellow oil (78 mg, 60 %);  $R_f$  = 0.4 (10 % EtOAc in Hexane)

UV-Vis (MeOH),  $\lambda_{\max}$  (nm): 314, 235, 210.  $^1\text{H}$  NMR (500 MHz, DMSO- $d_6$ , ppm):  $\delta$  7.99 - 7.97 (m, 1H), 7.84 - 7.82 (m, 1H), 7.73 - 7.70 (m, 1H), 7.58 - 7.54 (m, 1H), 7.05 - 7.02 (m, 1H), 6.37 - 6.32 (m, 1H), 5.99 - 5.91 (m, 4H), 5.33 - 5.29 (m, 2H), 5.23 - 5.22 (dd,  $J$  = 1.1 Hz,  $J$  = 4.85 Hz, 1H) 5.58 (s, 1H), 5.18 - 5.15 (m, 2H), 5.16 - 5.13 (m, 2H), 4.17 - 4.12 (m, 2H), 4.08 - 4.04 (m, 2H).  $^{13}\text{C}$  NMR (126 MHz, DMSO- $d_6$ , ppm):  $\delta$  148.4, 135.4, 133.9, 131.9, 131.0, 129.6, 129.0, 127.7, 124.7, 116.8, 100.0, 66.4. FT-IR (Thin film):  $\nu$  3447, 1523, 1345  $\text{cm}^{-1}$ . HRMS (ESI-TOF):  $m/z$  Calcd. for  $[\text{C}_{15}\text{H}_{17}\text{NO}_3]$  218.0817 ( $[\text{M}-\text{CH}_2\text{CH}=\text{CH}_2]^+$ ); Found: 218.0811.

### 5. Mechanistic Studies

#### a) Radical trapping experiment with TEMPO

A 10 ml round bottom flask was charged with  $\text{CuSO}_4 \cdot 5\text{H}_2\text{O}$  (0.025 mmol, 5 mol %) in 1 ml methanol. The mixture was stirred for 30 min, then aldehyde (0.05 mmol) and TEMPO (0.75 mmol) were added. Then the reaction mixture was stirred at room temperature for 24 h. A portion of the reaction mixture was collected and analysed by HR-MS. The TEMPO adduct **5** was not detected.

#### b) Radical trapping experiment with BHT

A 10 ml round bottom flask was charged with  $\text{CuSO}_4 \cdot 5\text{H}_2\text{O}$  (0.025 mmol, 5 mol %) in 1 ml methanol. The mixture was stirred for 30 min, then aldehyde (0.05 mmol) and BHT (0.75 mmol) were added. Then the reaction mixture was stirred at room temperature for 24 h. A portion of the reaction mixture was collected and analysed by HR-MS. Unfortunately, we could not able to detect the adduct **6** in the HR-MS.

#### c) Deuterium labelling experiment

A 10 ml round bottom flask was charged with  $\text{CuSO}_4 \cdot 5\text{H}_2\text{O}$  (0.025 mmol, 5 mol %) in 1 ml  $\text{CD}_3\text{OD}$ . The mixture was stirred for 30 min, then aldehyde (0.05 mmol) was added. Then the reaction mixture was stirred at room temperature for 24 h. Then the solvent was removed under reduced pressure and the crude reaction mixture was purified by silica gel column chromatography (Hexane/EtOAc = 99/1) to obtain the corresponding deuterated product which was analysed by NMR spectroscopy (**Figure S27 & 28**). Since there was an interference of  $\text{CH}_3$  proton peak and water peak at 3.33 ppm in  $\text{dmsO}-d_6$ , we have analysed product **7** in  $\text{CDCl}_3$  also to avoid the misinterpretation of the data.



### I) Radical trapping experiments

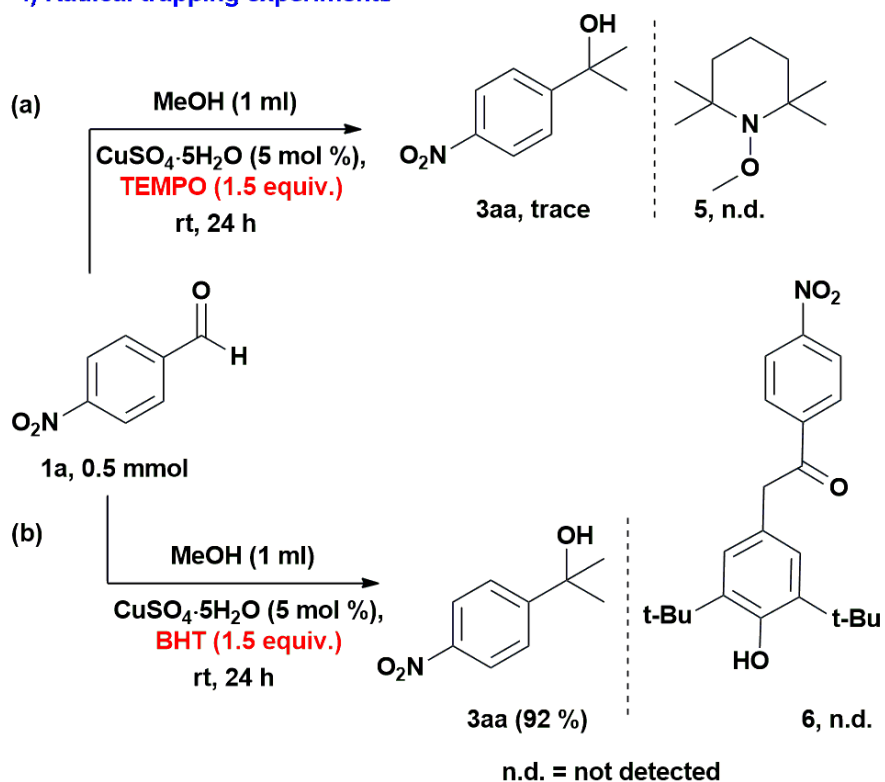

### II) Deuterium labelling experiment

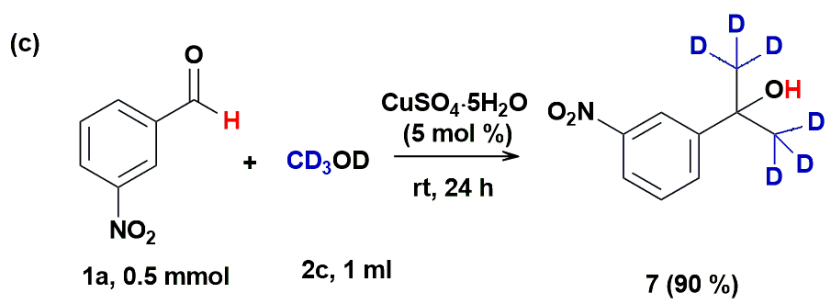

### III) Inert reaction

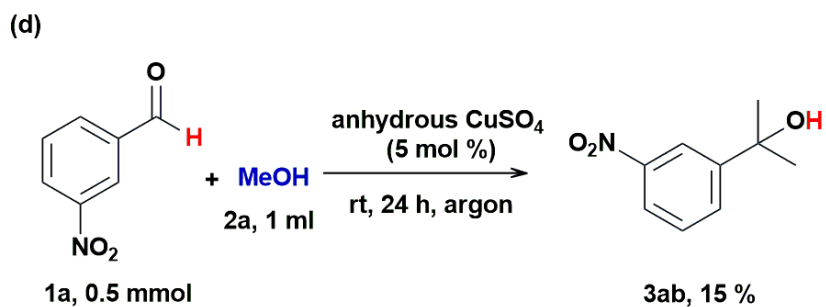

#### d) Inert reaction

A 10 ml round bottom flask was charged with  $\text{CuSO}_4 \cdot 5\text{H}_2\text{O}$  (0.025 mmol, 5 mol %) under an argon atmosphere. Then, 1 ml of dry MeOH was added using syringe. The mixture was stirred for 30 min, then aldehyde (0.05 mmol) was added under argon atmosphere. The reaction mixture was stirred at room temperature for 24 h under argon atmosphere. Then the solvent was removed under reduced pressure and the crude reaction mixture was purified by silica gel column chromatography (Hexane/EtOAc = 99/1) to obtain the corresponding product **3ab**.

#### e) Hydrogen peroxide ( $\text{H}_2\text{O}_2$ ) detection using XploSens PS™ peroxides detection strip

A 10 ml round bottom flask was charged with  $\text{CuSO}_4 \cdot 5\text{H}_2\text{O}$  (0.025 mmol, 5 mol %) in 1 ml  $\text{CD}_3\text{OD}$ . The mixture was stirred for 30 min, then aldehyde (0.05 mmol) was added. Then, the XploSens PS™ peroxides detection strip was immersed in the reaction mixture for 5 seconds and the resulting color change was noted. This procedure was repeated at 3, 6, 12, and 24 h to monitor peroxide levels over time. The appearance of pale-yellow colour was observed indicating the presence of peroxide in the solution ( $\approx 100$ -250 ppm).

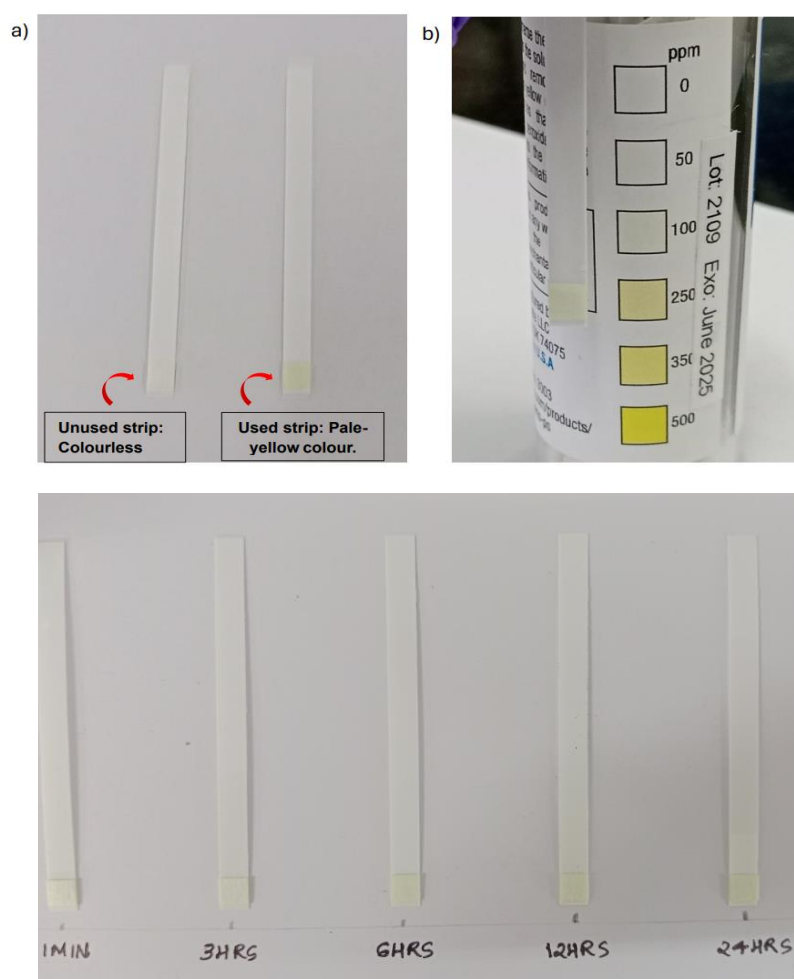

**Figure S1:** a) XploSens PS™ peroxides detection strip before and after immersion. b) Immersed strip and quantification scale c) At different time intervals; 1min – just after the addition of substrate

## 6. $^1\text{H}$ NMR and $^{13}\text{C}$ NMR Spectra of Methylated Products

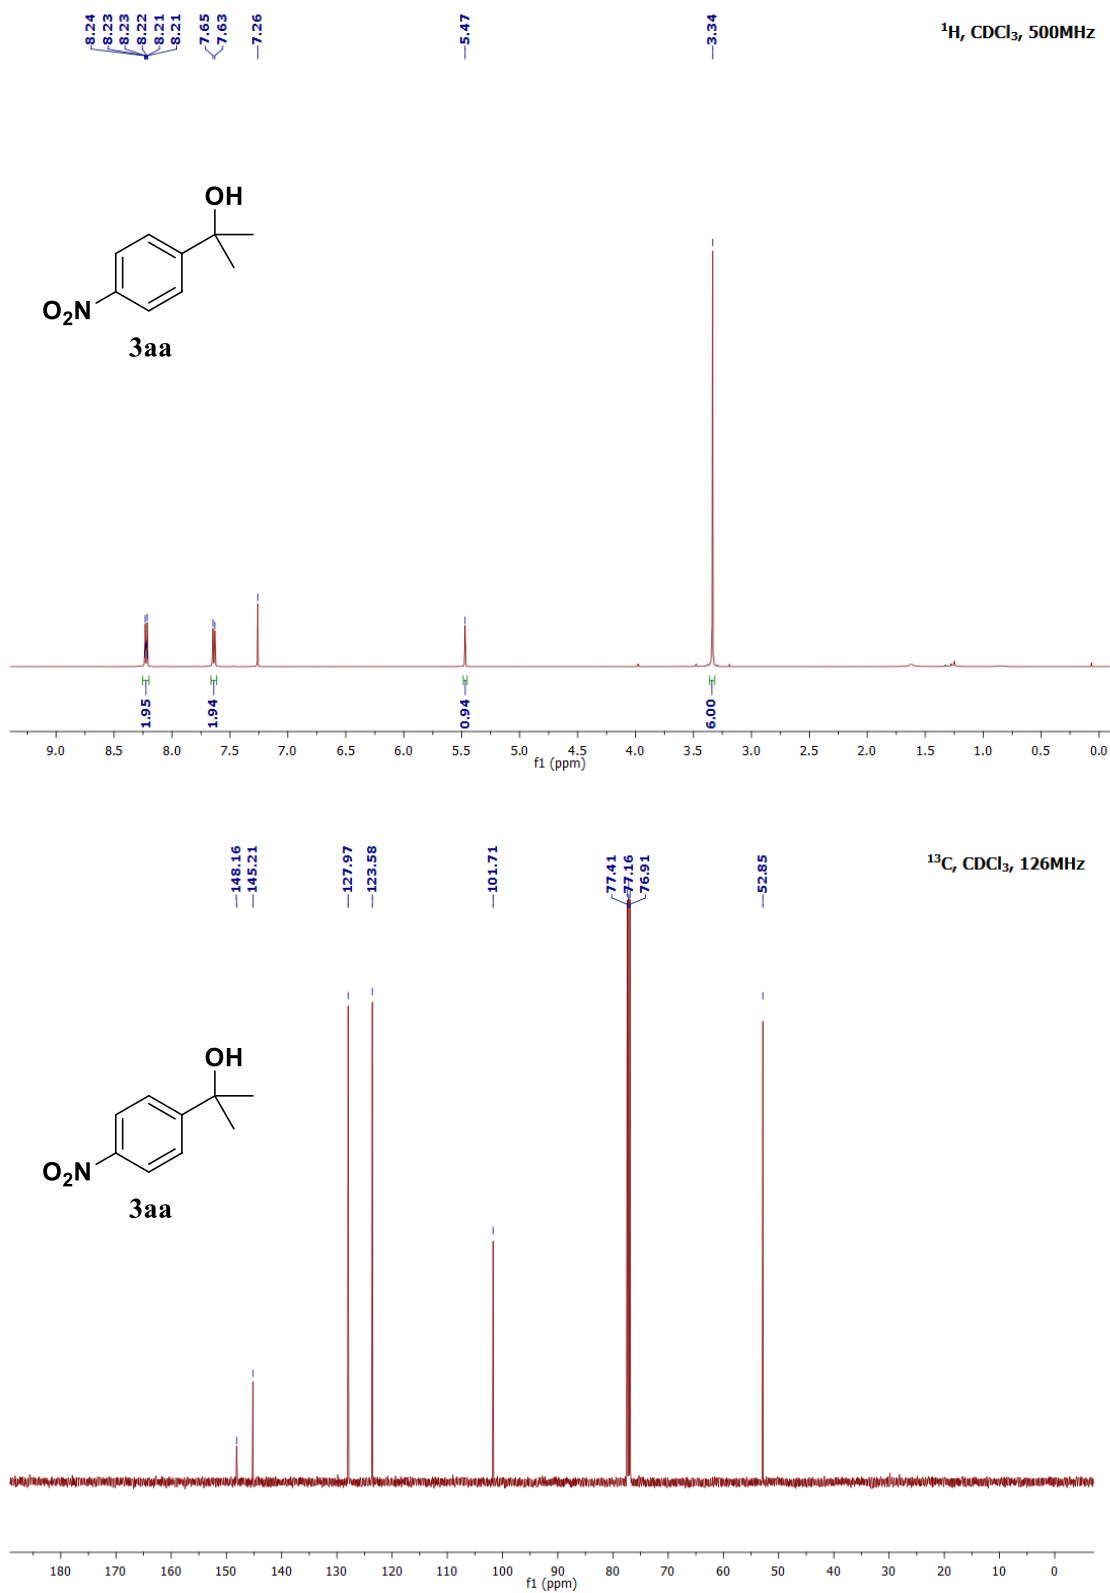

Figure S2:  $^1\text{H}$  NMR and  $^{13}\text{C}$  NMR Spectra of 2-(4-nitrophenyl)propan-2-ol (3aa)

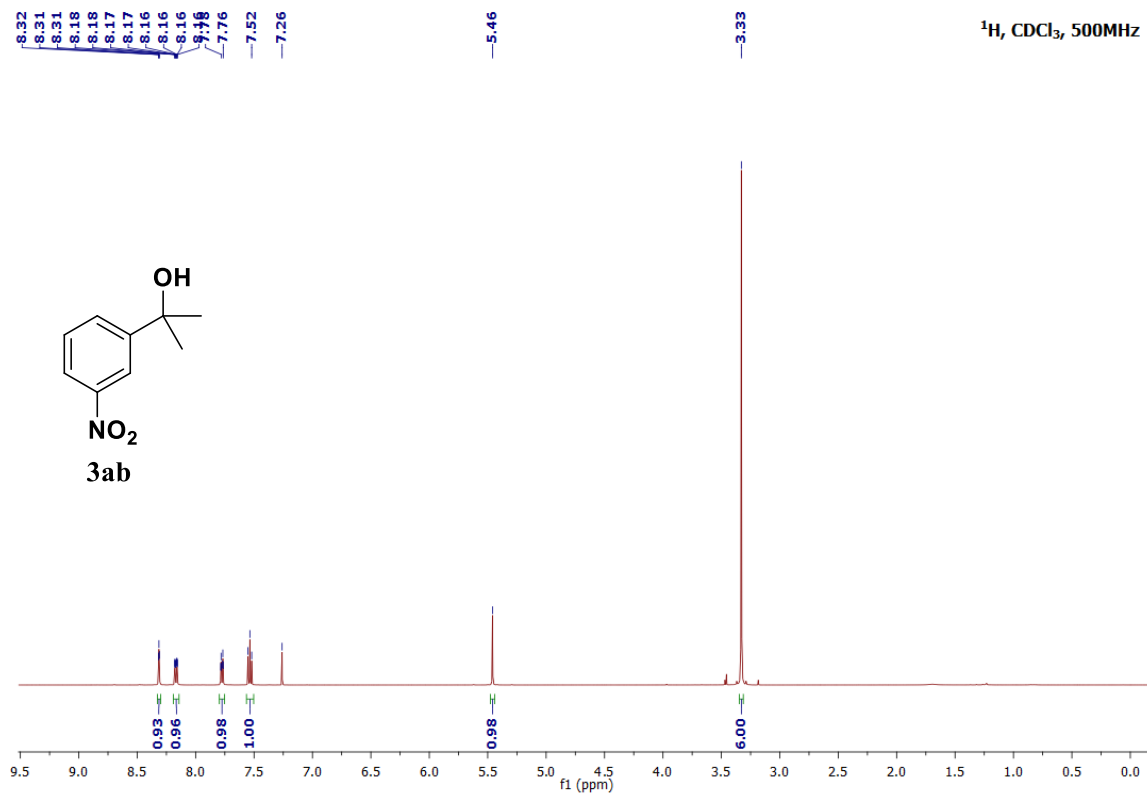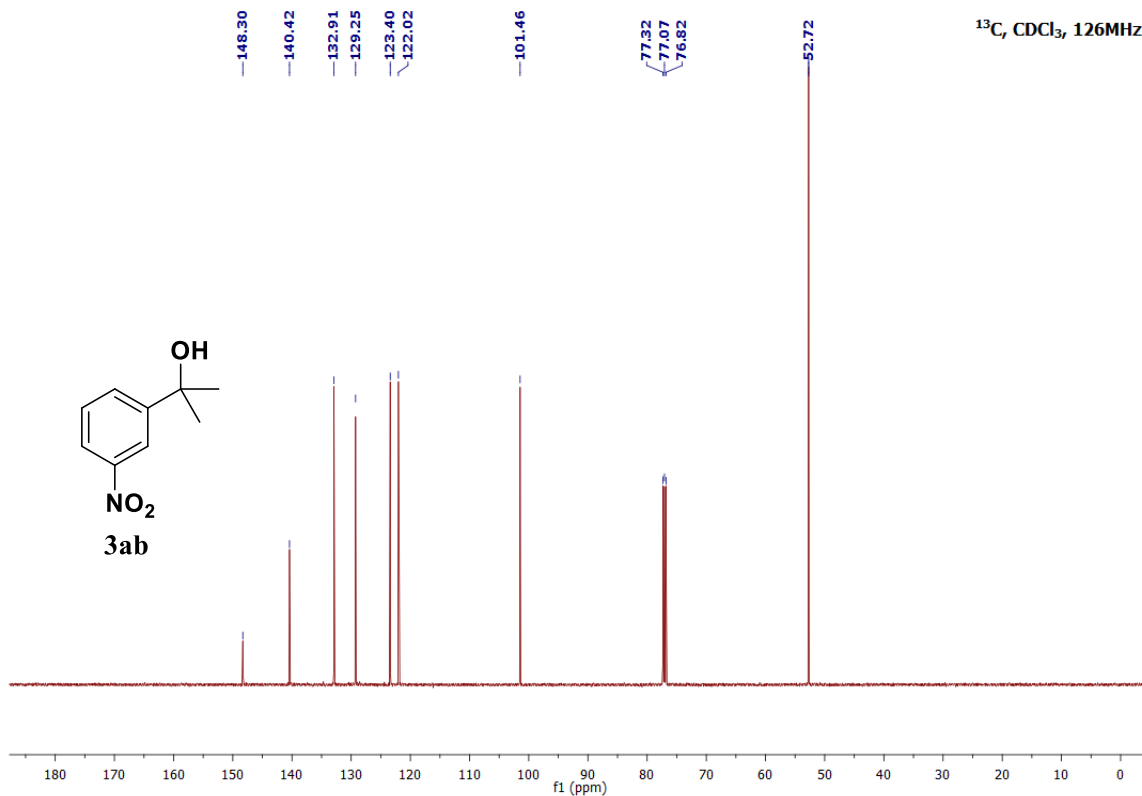

Figure S3: <sup>1</sup>H NMR and <sup>13</sup>C NMR Spectra of 2-(3-nitrophenyl)propan-2-ol (3ab)

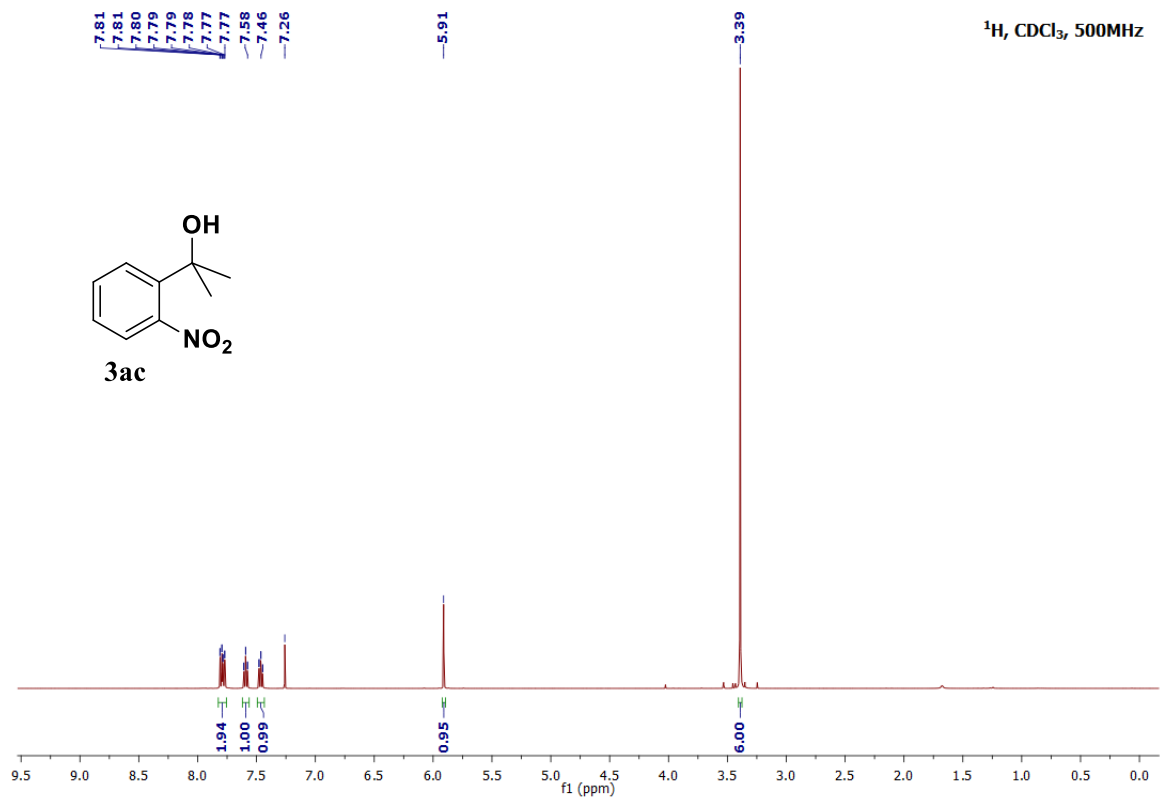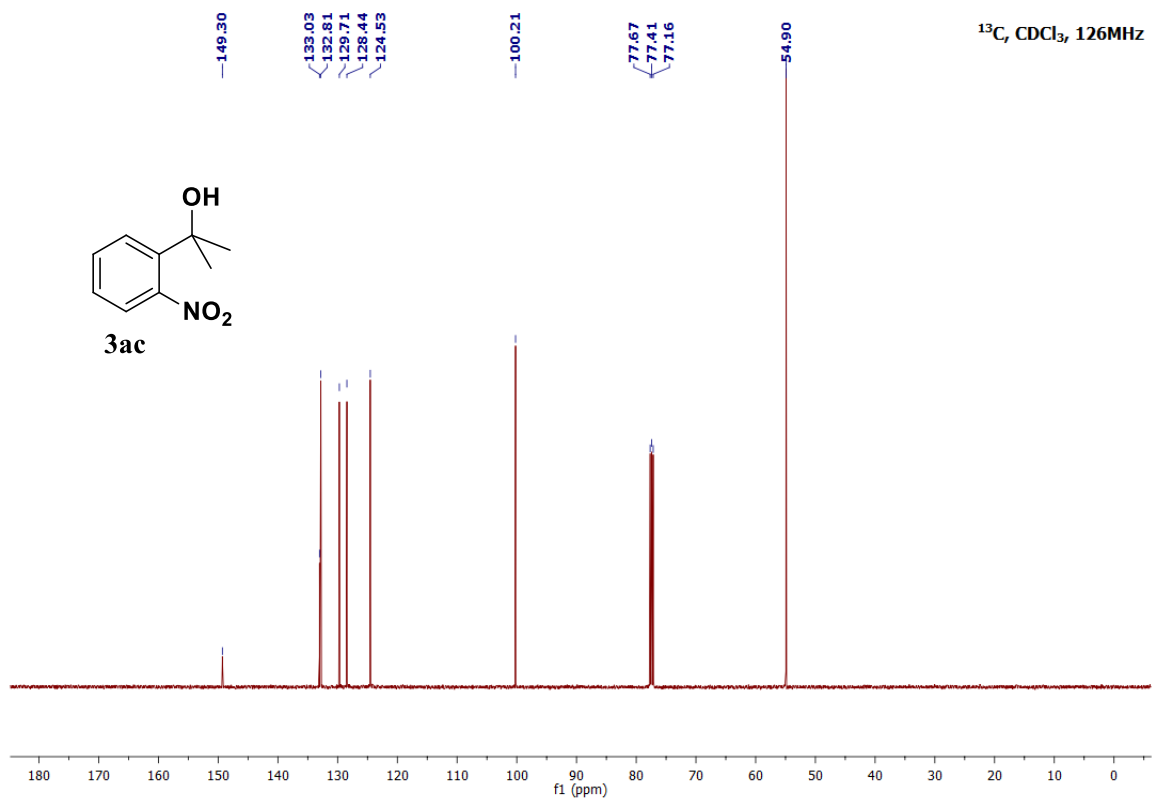

**Figure S4: <sup>1</sup>H NMR and <sup>13</sup>C NMR Spectra of 2-(2-nitrophenyl)propan-2-ol (3ac)**

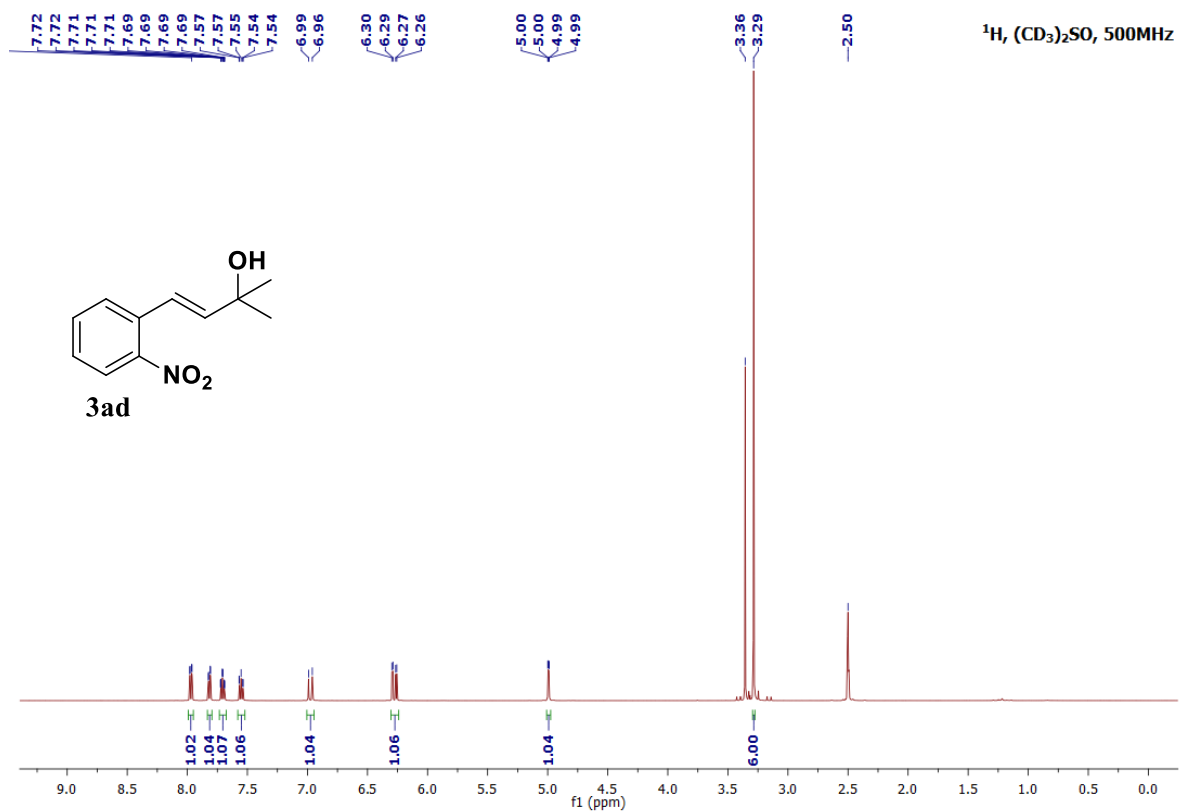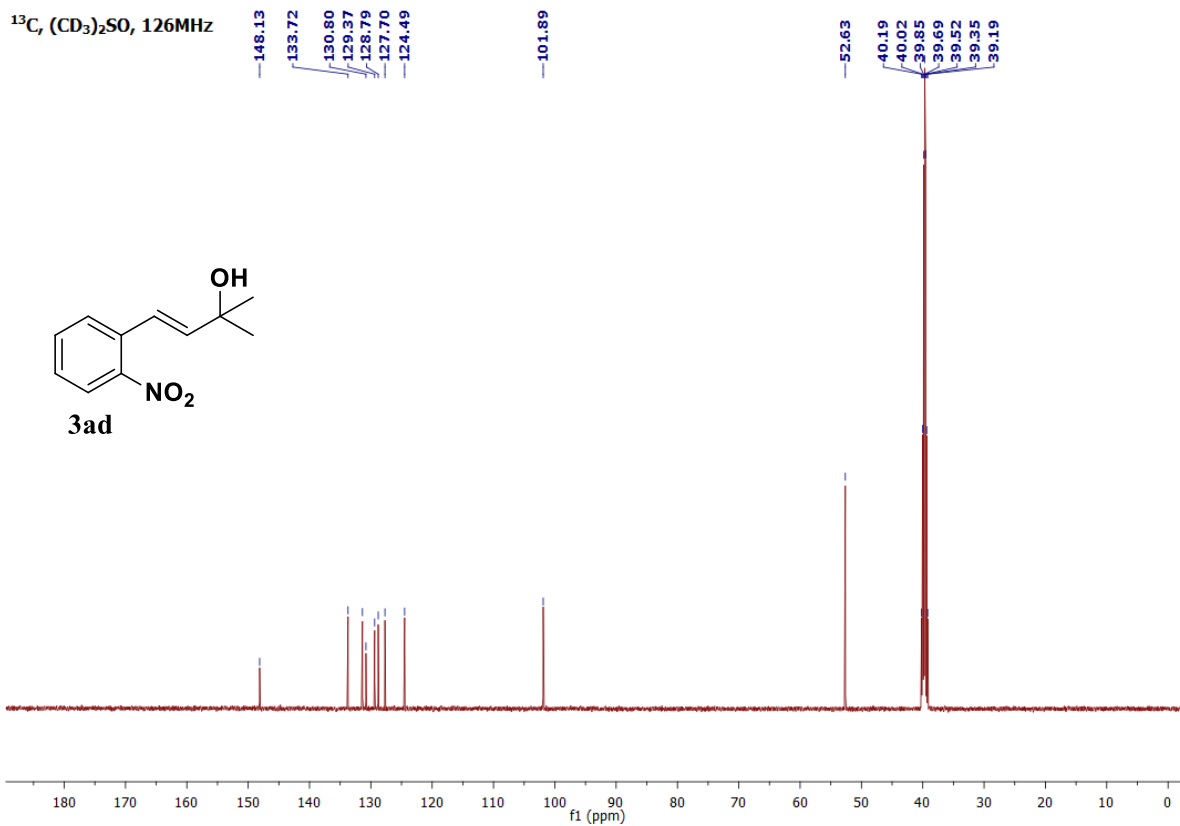

Figure S5: <sup>1</sup>H NMR and <sup>13</sup>C NMR Spectra of (*E*)-2-methyl-4-(2-nitrophenyl)but-3-en-2-ol (**3ad**)

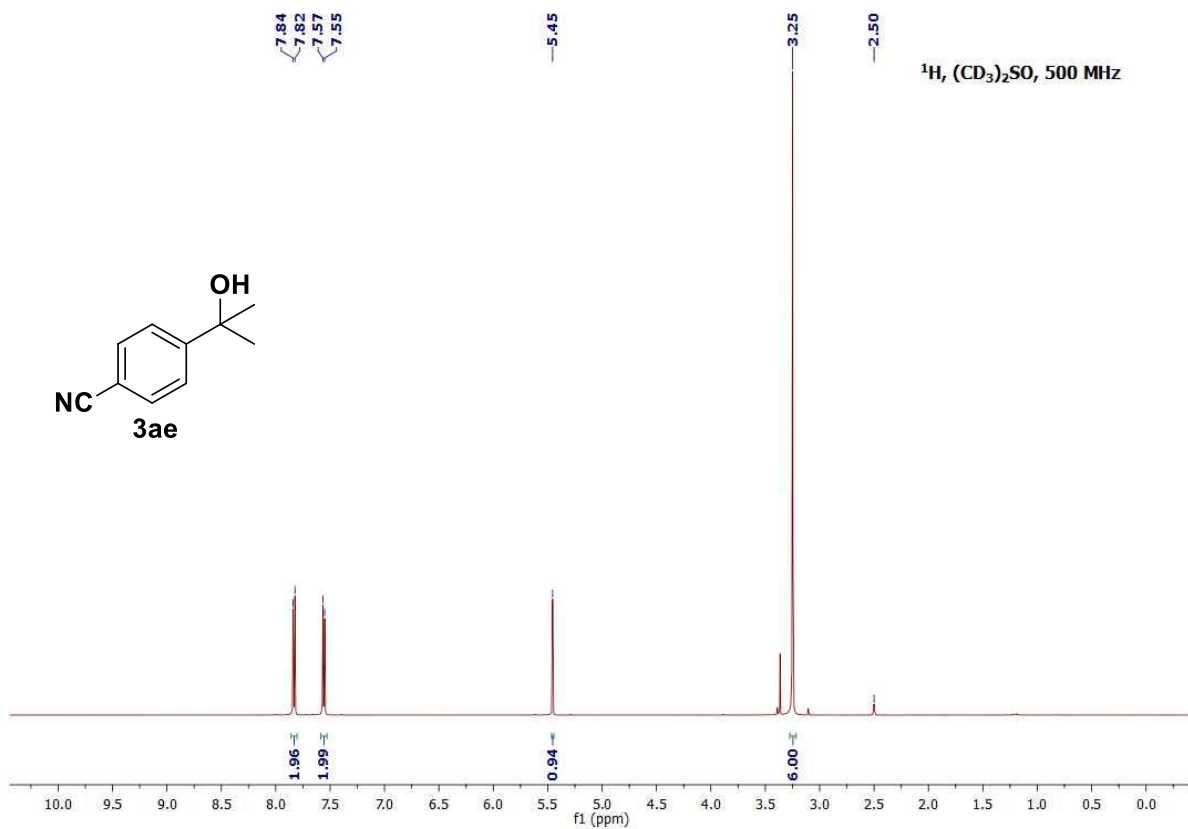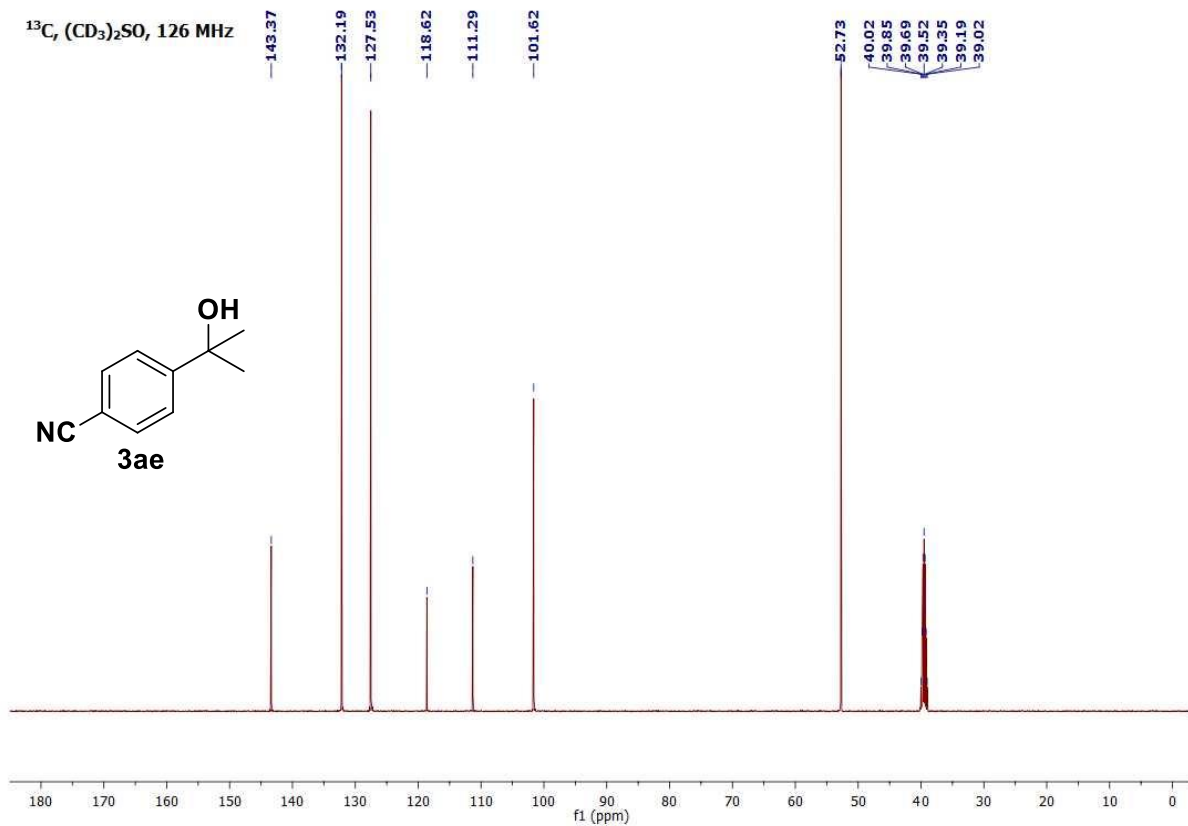

**Figure S6: <sup>1</sup>H NMR and <sup>13</sup>C NMR Spectra of 4-(2-hydroxypropan-2-yl)benzonitrile (3ae)**

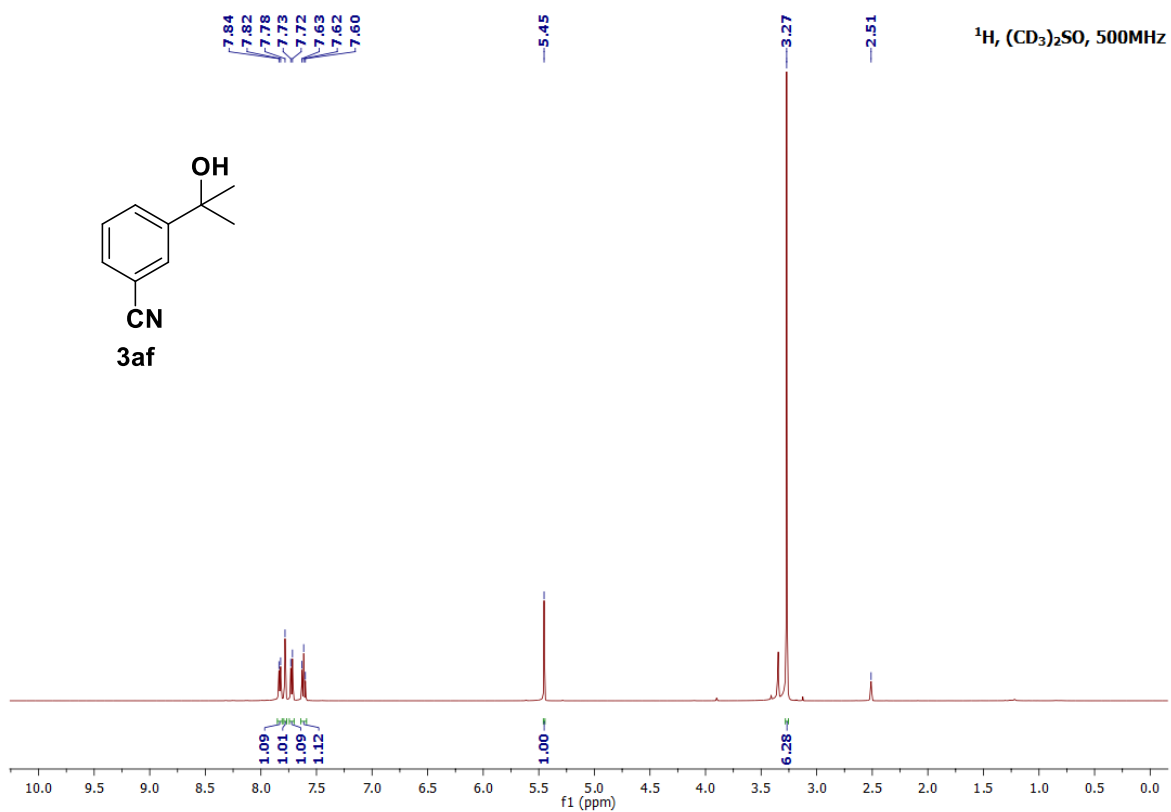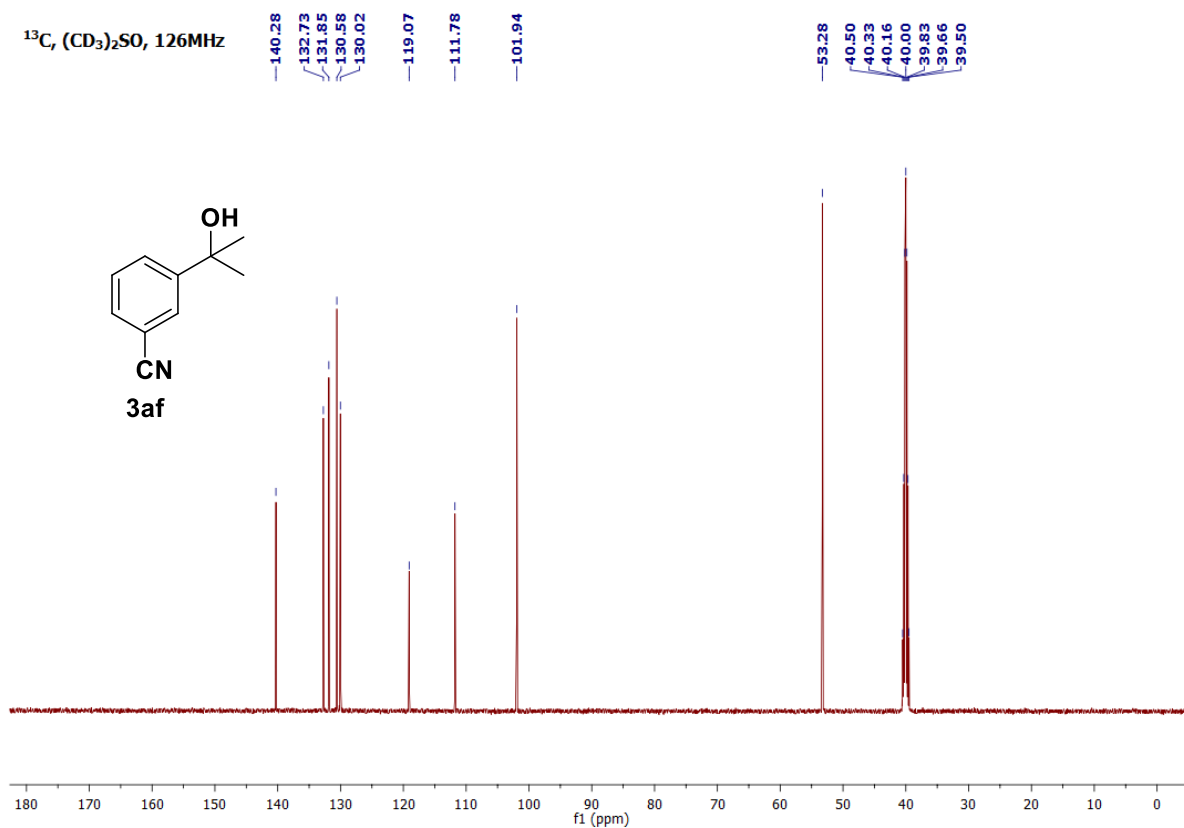

**Figure S7: <sup>1</sup>H NMR and <sup>13</sup>C NMR Spectra of 3-(2-hydroxypropan-2-yl)benzonitrile (3ae)**



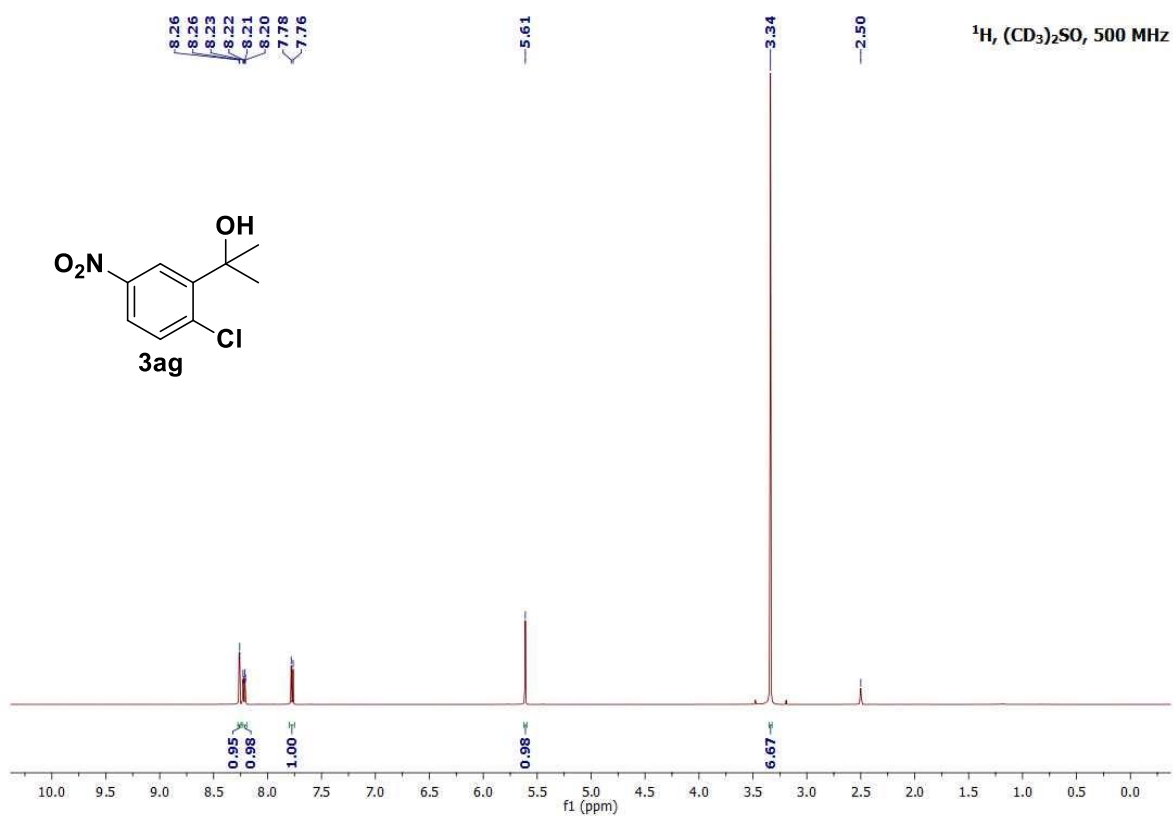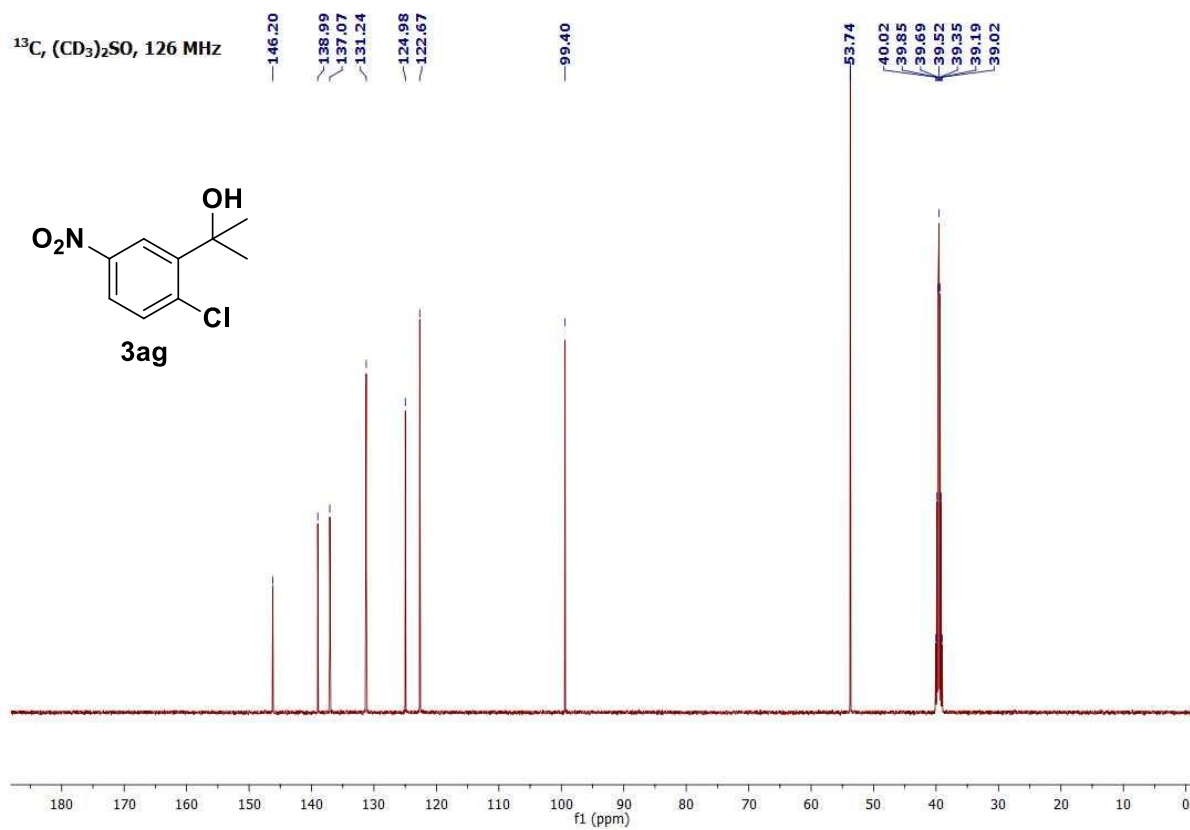

**Figure S8: <sup>1</sup>H NMR and <sup>13</sup>C NMR Spectra of 2-(2-chloro-5-nitrophenyl)propan-2-ol (3ag)**

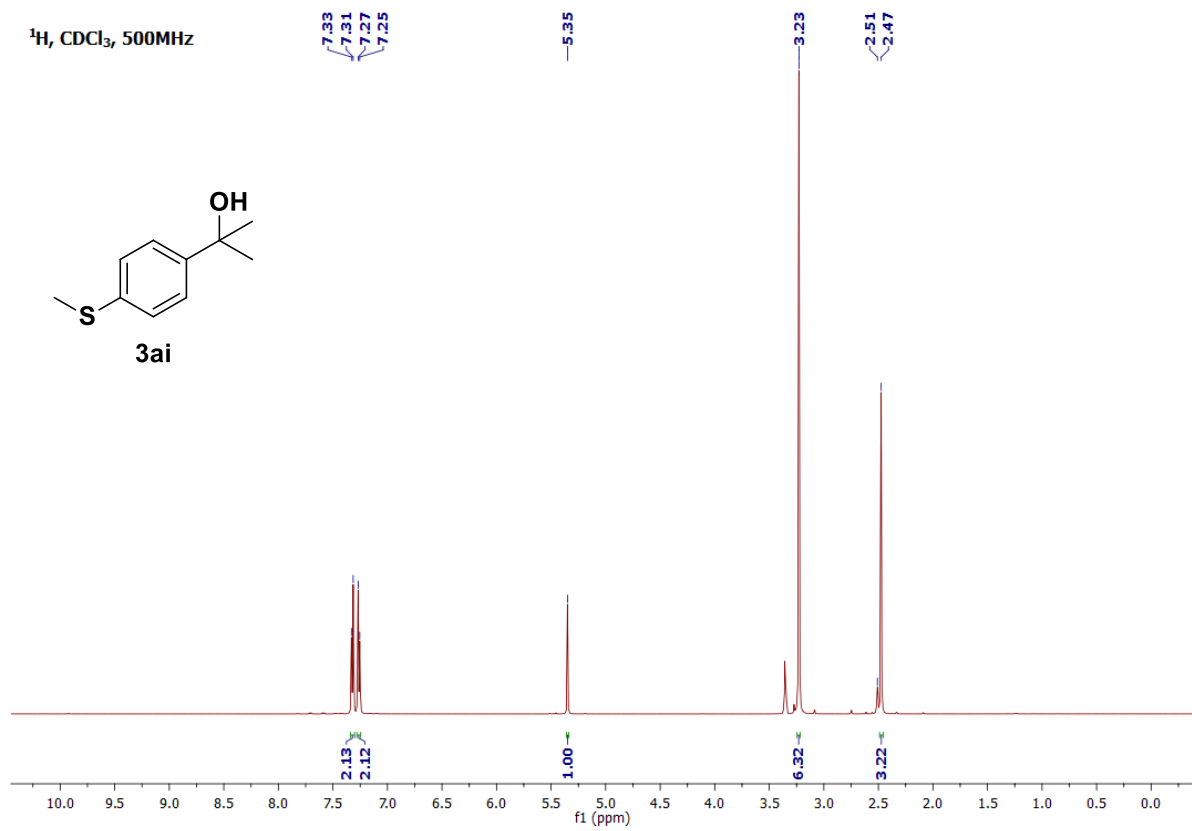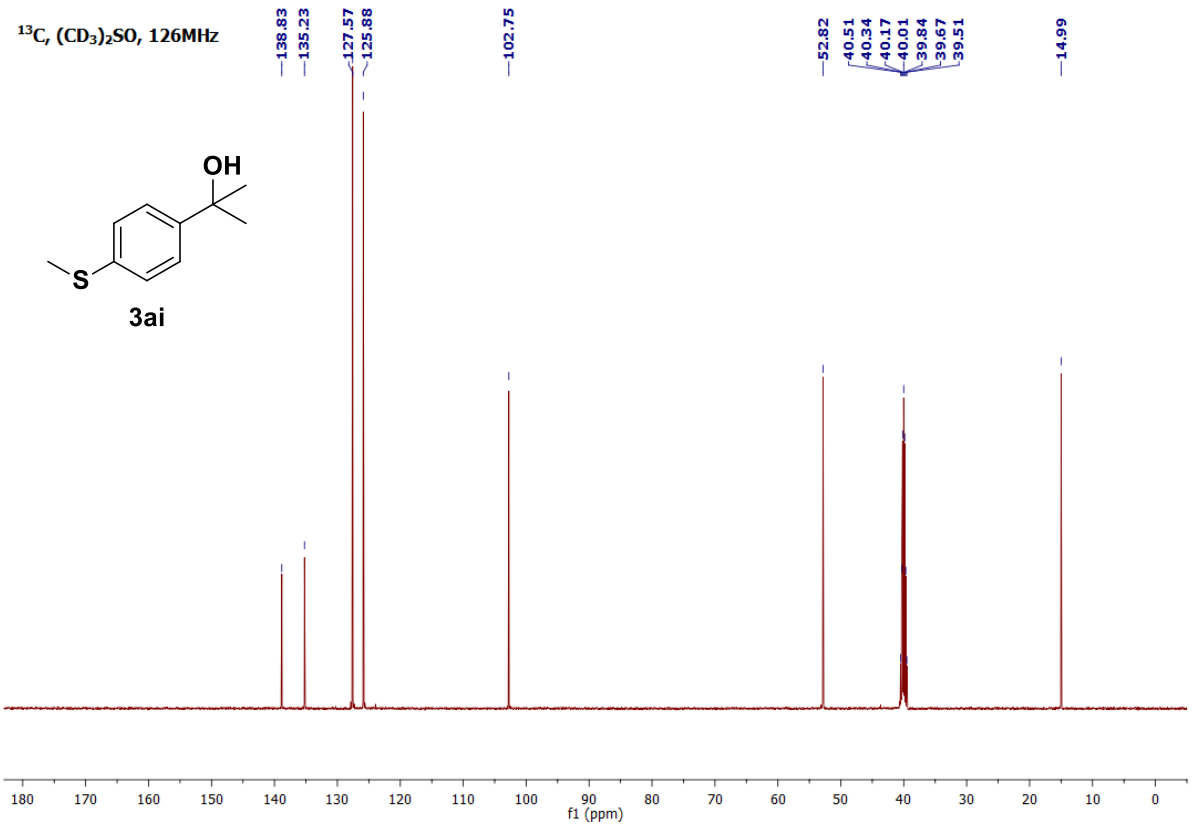

Figure S9: <sup>1</sup>H NMR and <sup>13</sup>C NMR Spectra of 2-(4-(methylthio)phenyl)propan-2-ol (3ai)

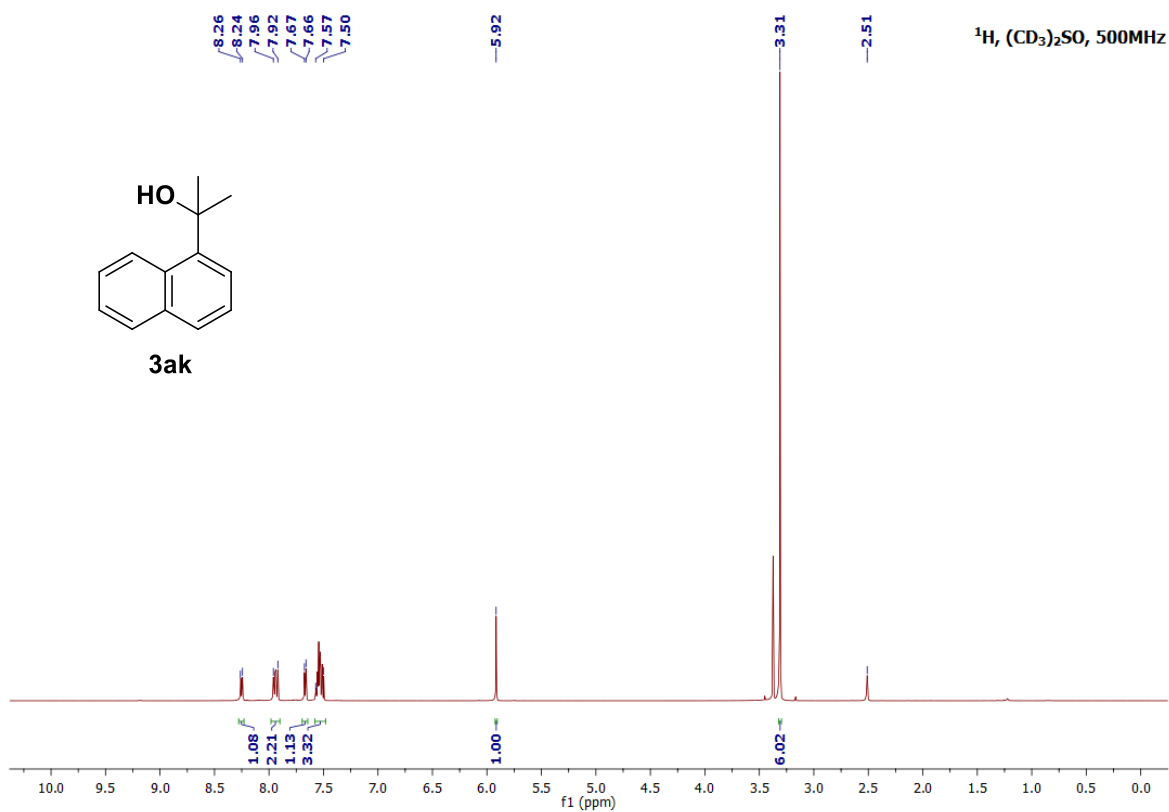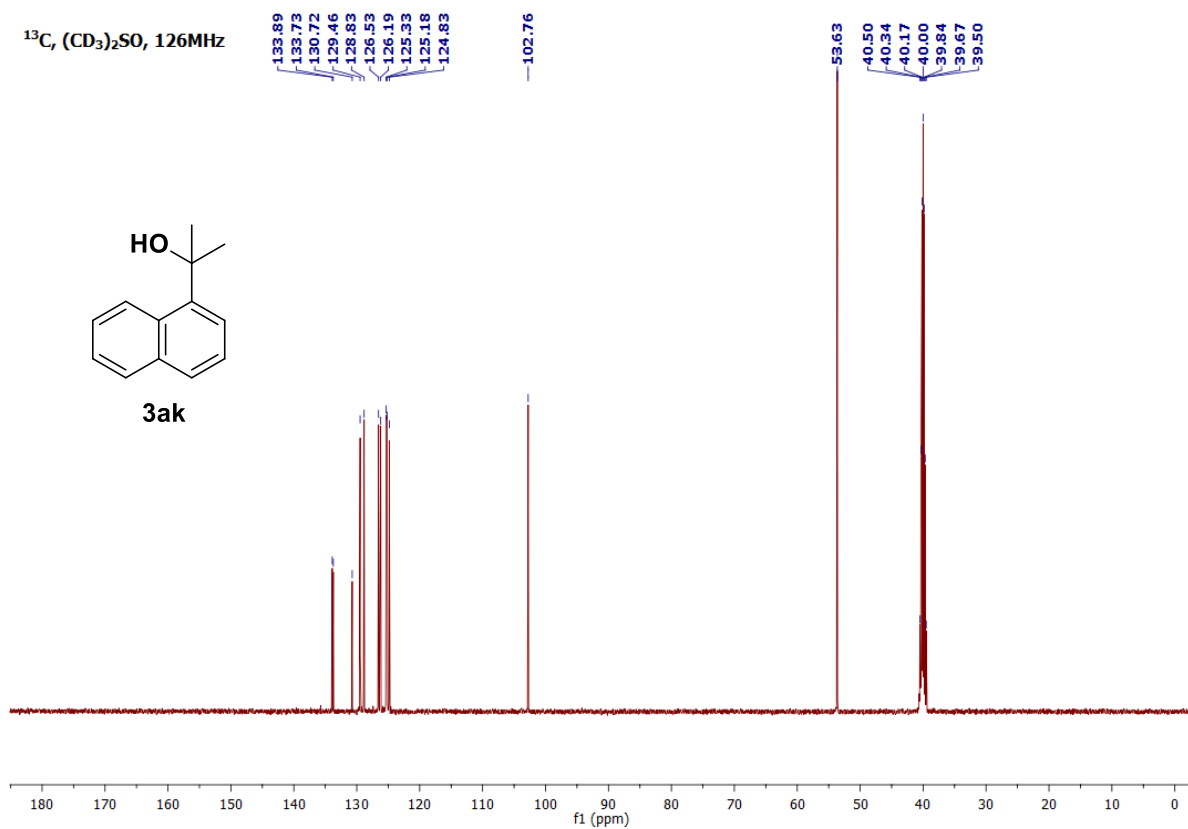

**Figure S10: <sup>1</sup>H NMR and <sup>13</sup>C NMR Spectra of 2-(naphthalen-1-yl)propan-2-ol (3ak)**

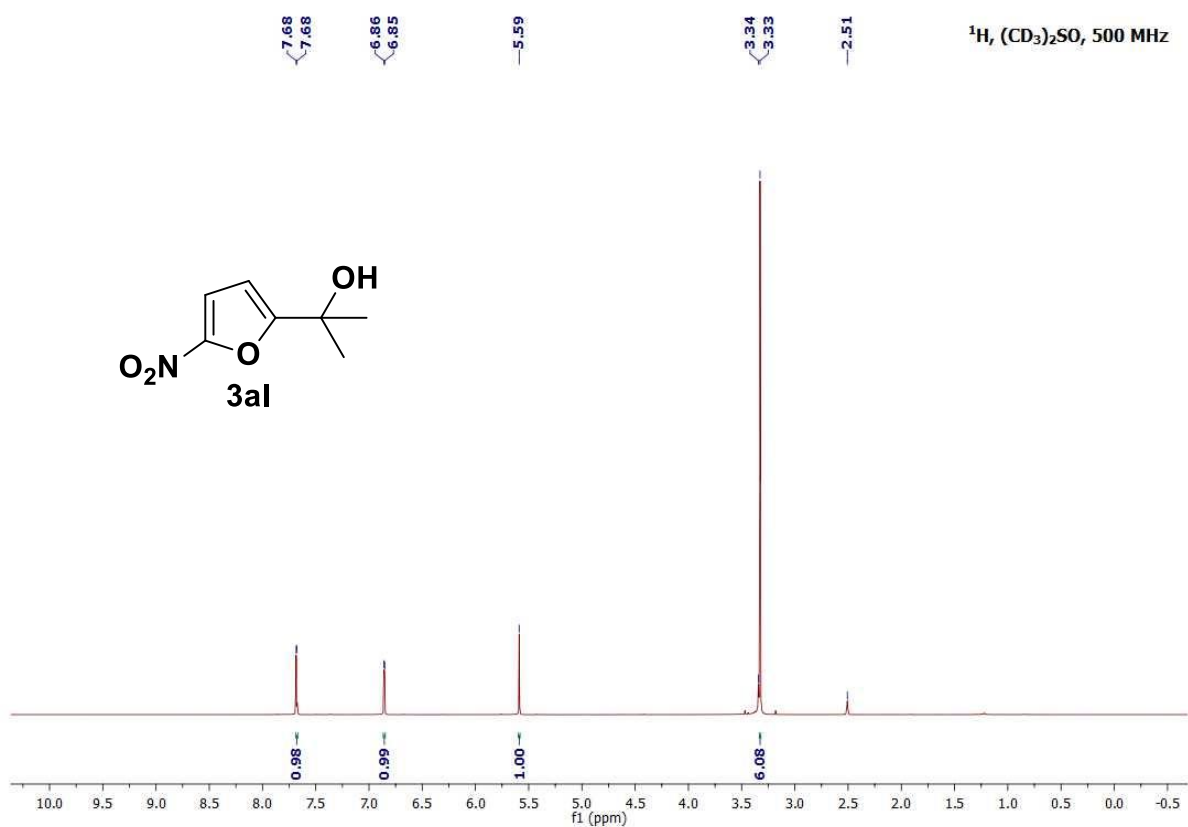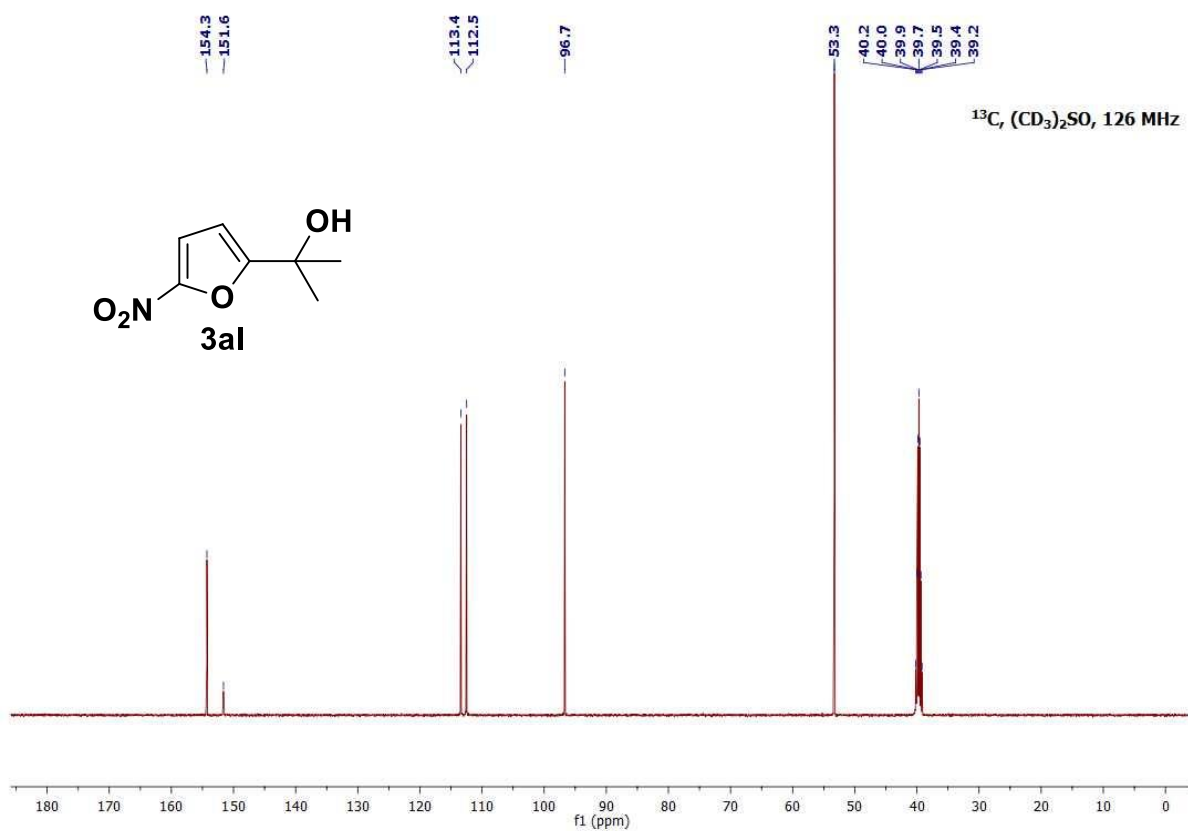

Figure S11: <sup>1</sup>H NMR and <sup>13</sup>C NMR Spectra of 2-(5-nitrofuran-2-yl)propan-2-ol (3al)

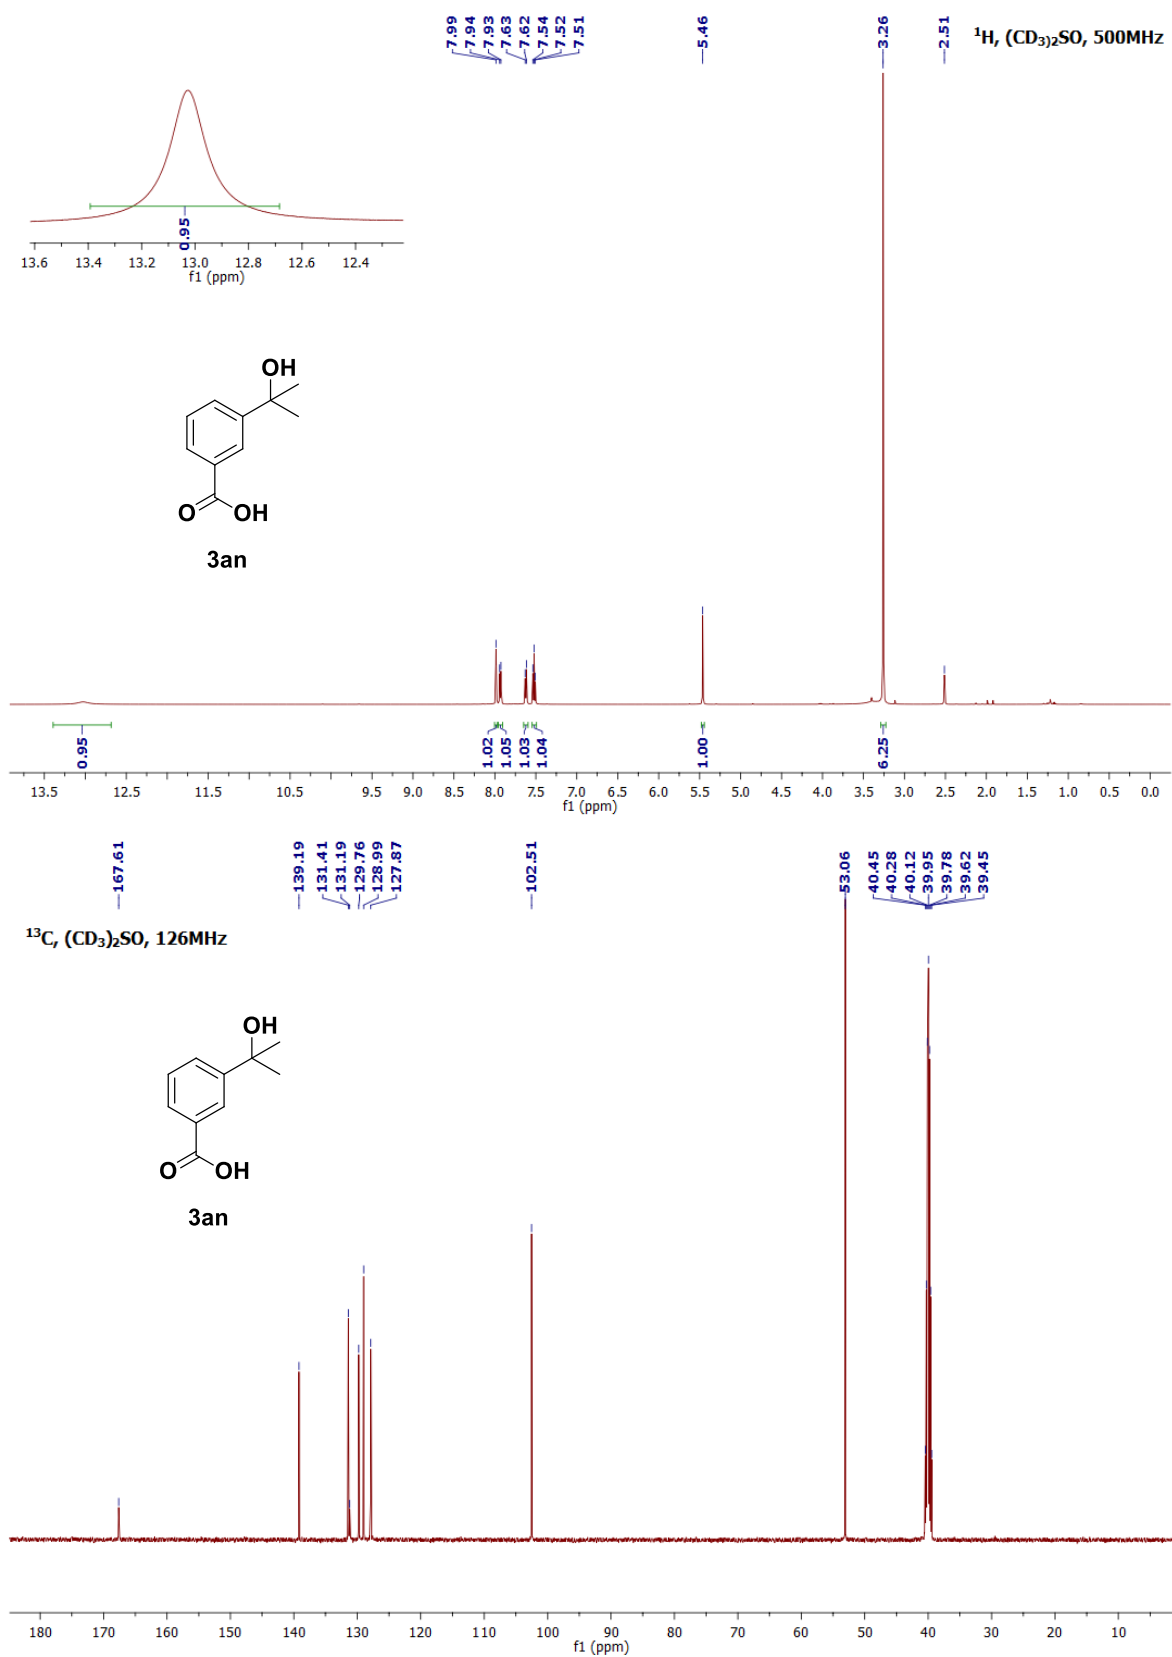

**Figure S12: <sup>1</sup>H NMR and <sup>13</sup>C NMR Spectra of 3-(2-hydroxypropan-2-yl)benzoic acid (3an)**

## 7. $^1\text{H}$ NMR and $^{13}\text{C}$ NMR Spectra of Ethylated Products

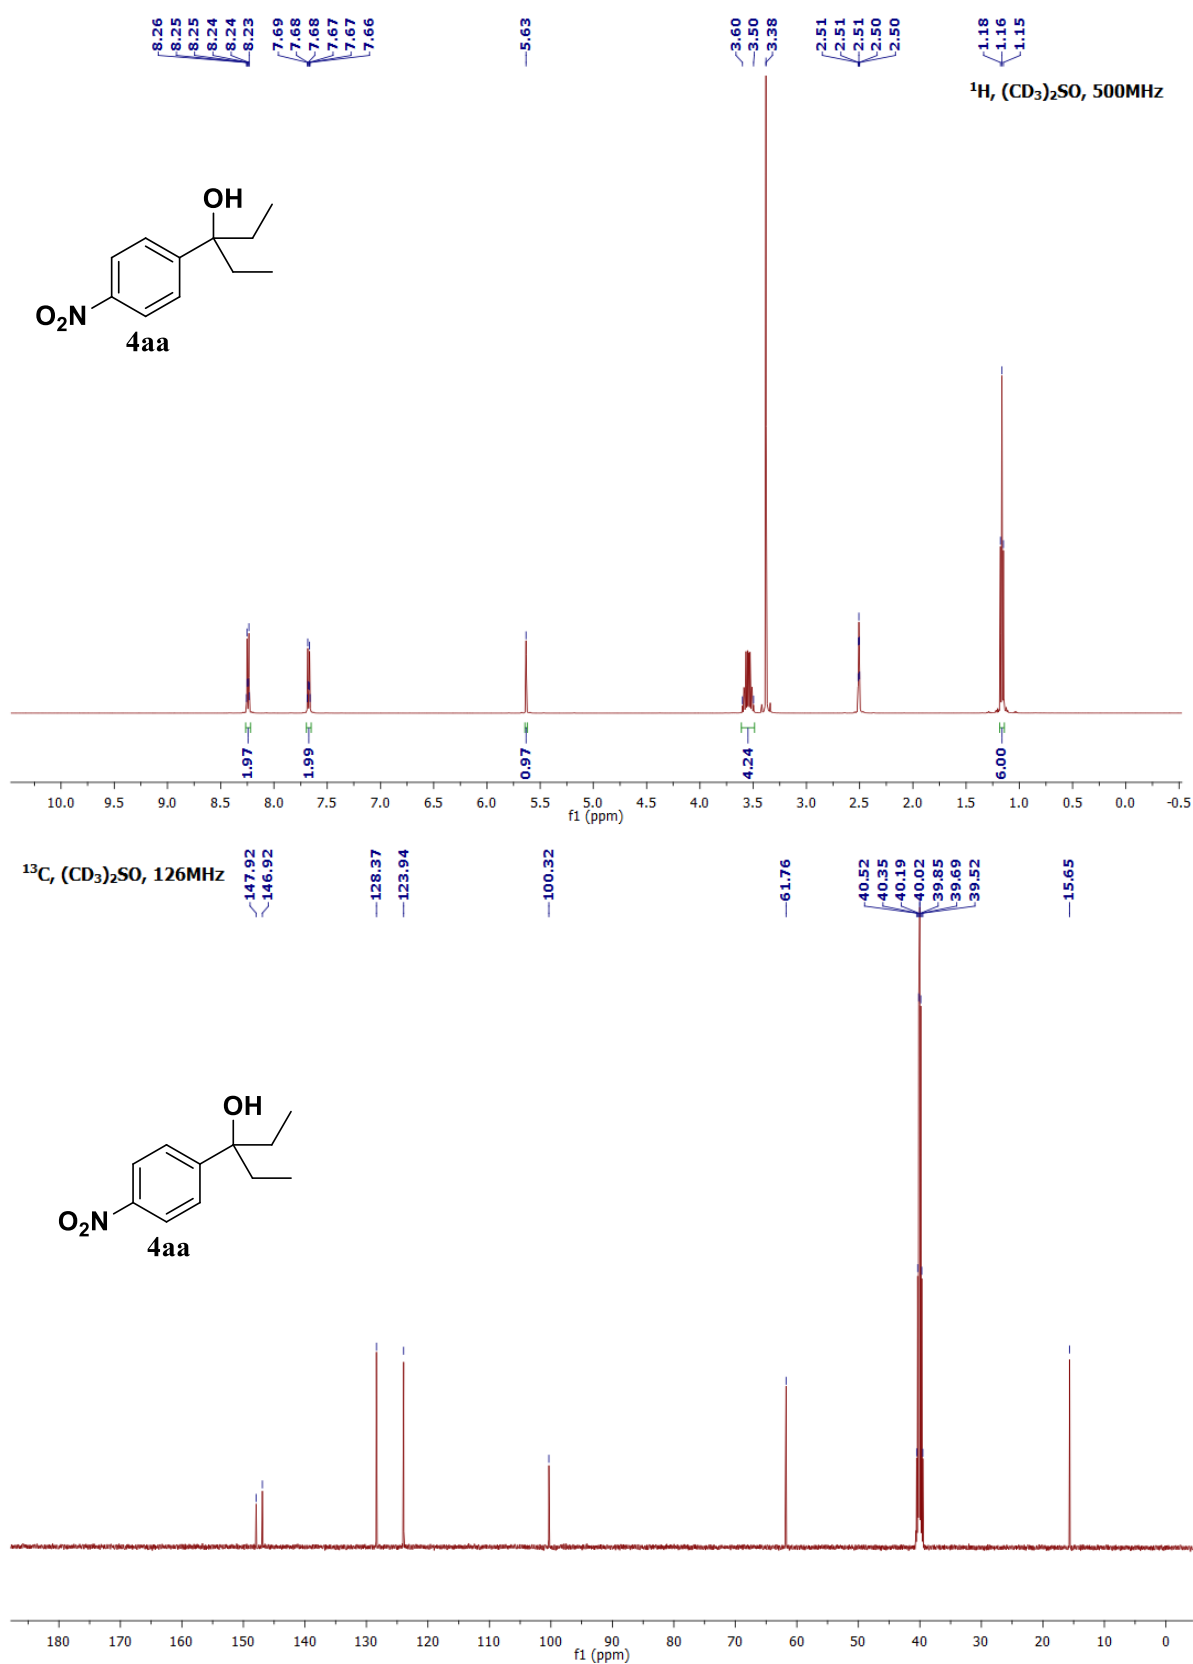

Figure S13:  $^1\text{H}$  NMR and  $^{13}\text{C}$  NMR Spectra of 3-(4-nitrophenyl)pentan-3-ol (4aa)

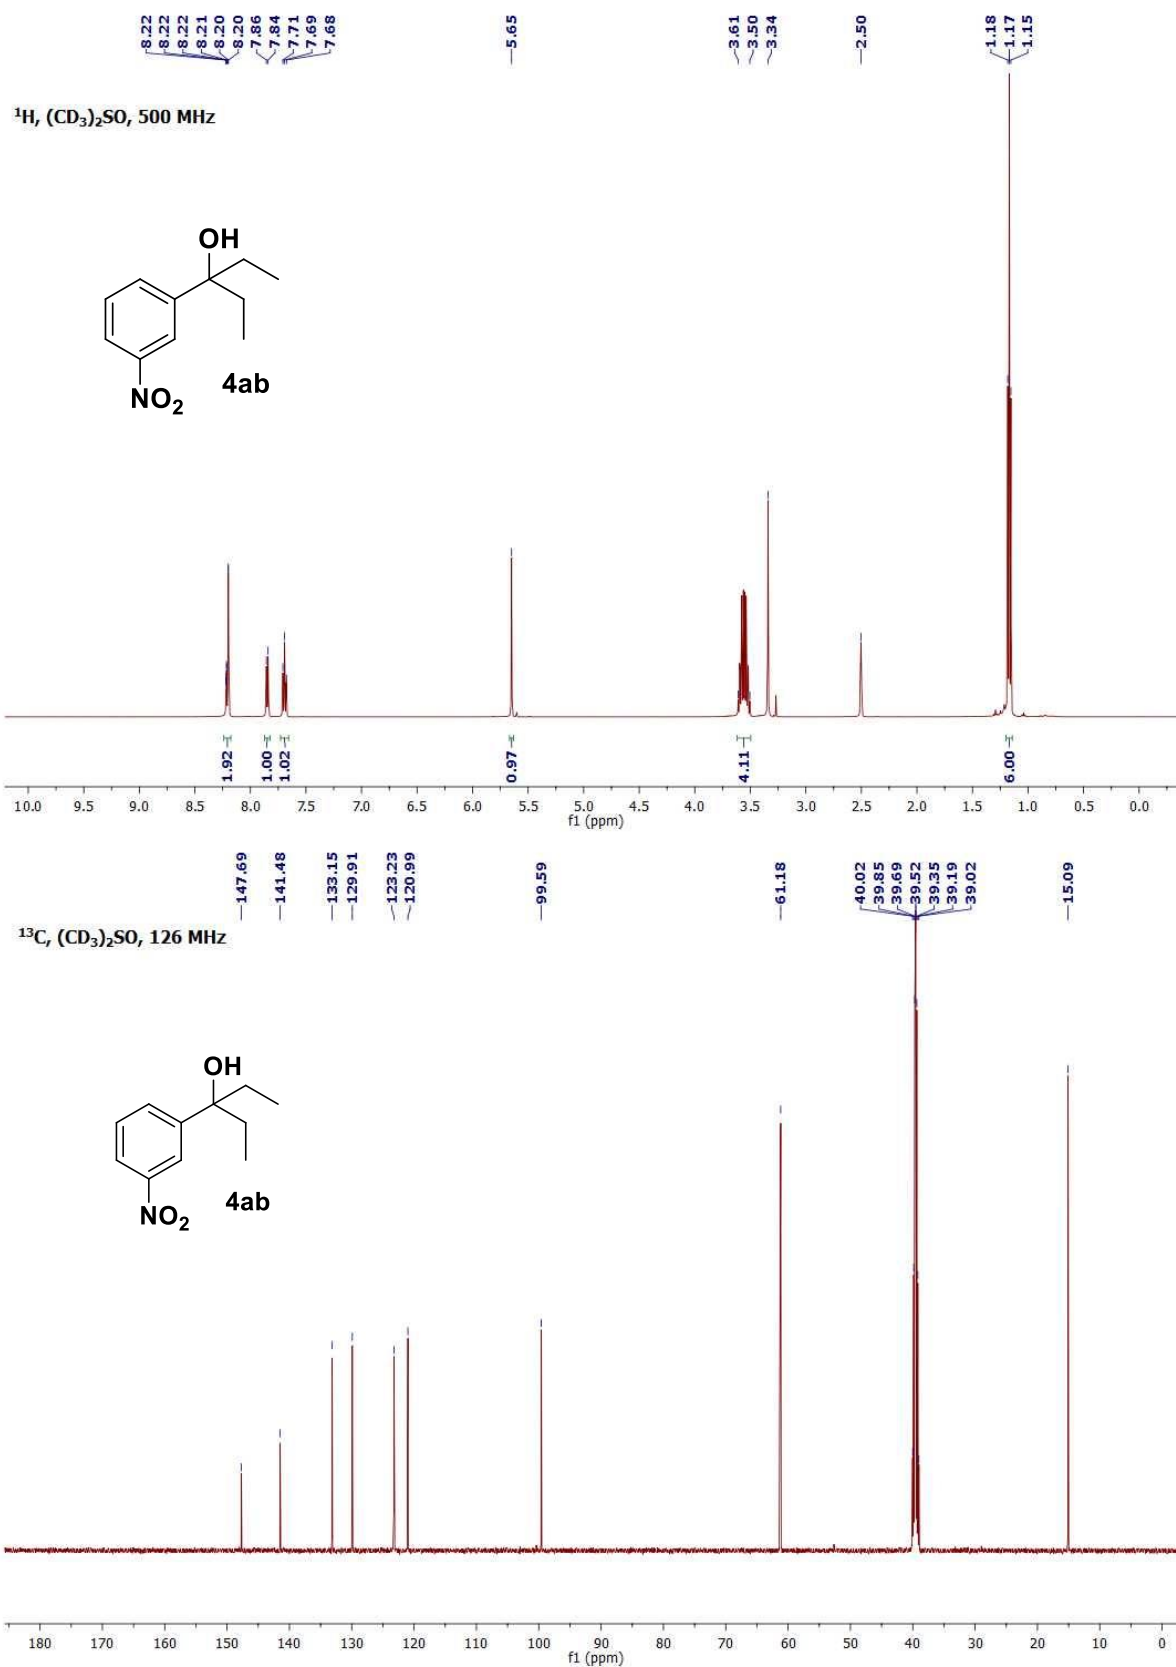

Figure S14: <sup>1</sup>H NMR and <sup>13</sup>C NMR Spectra of 3-(3-nitrophenyl)pentan-3-ol (4ab)

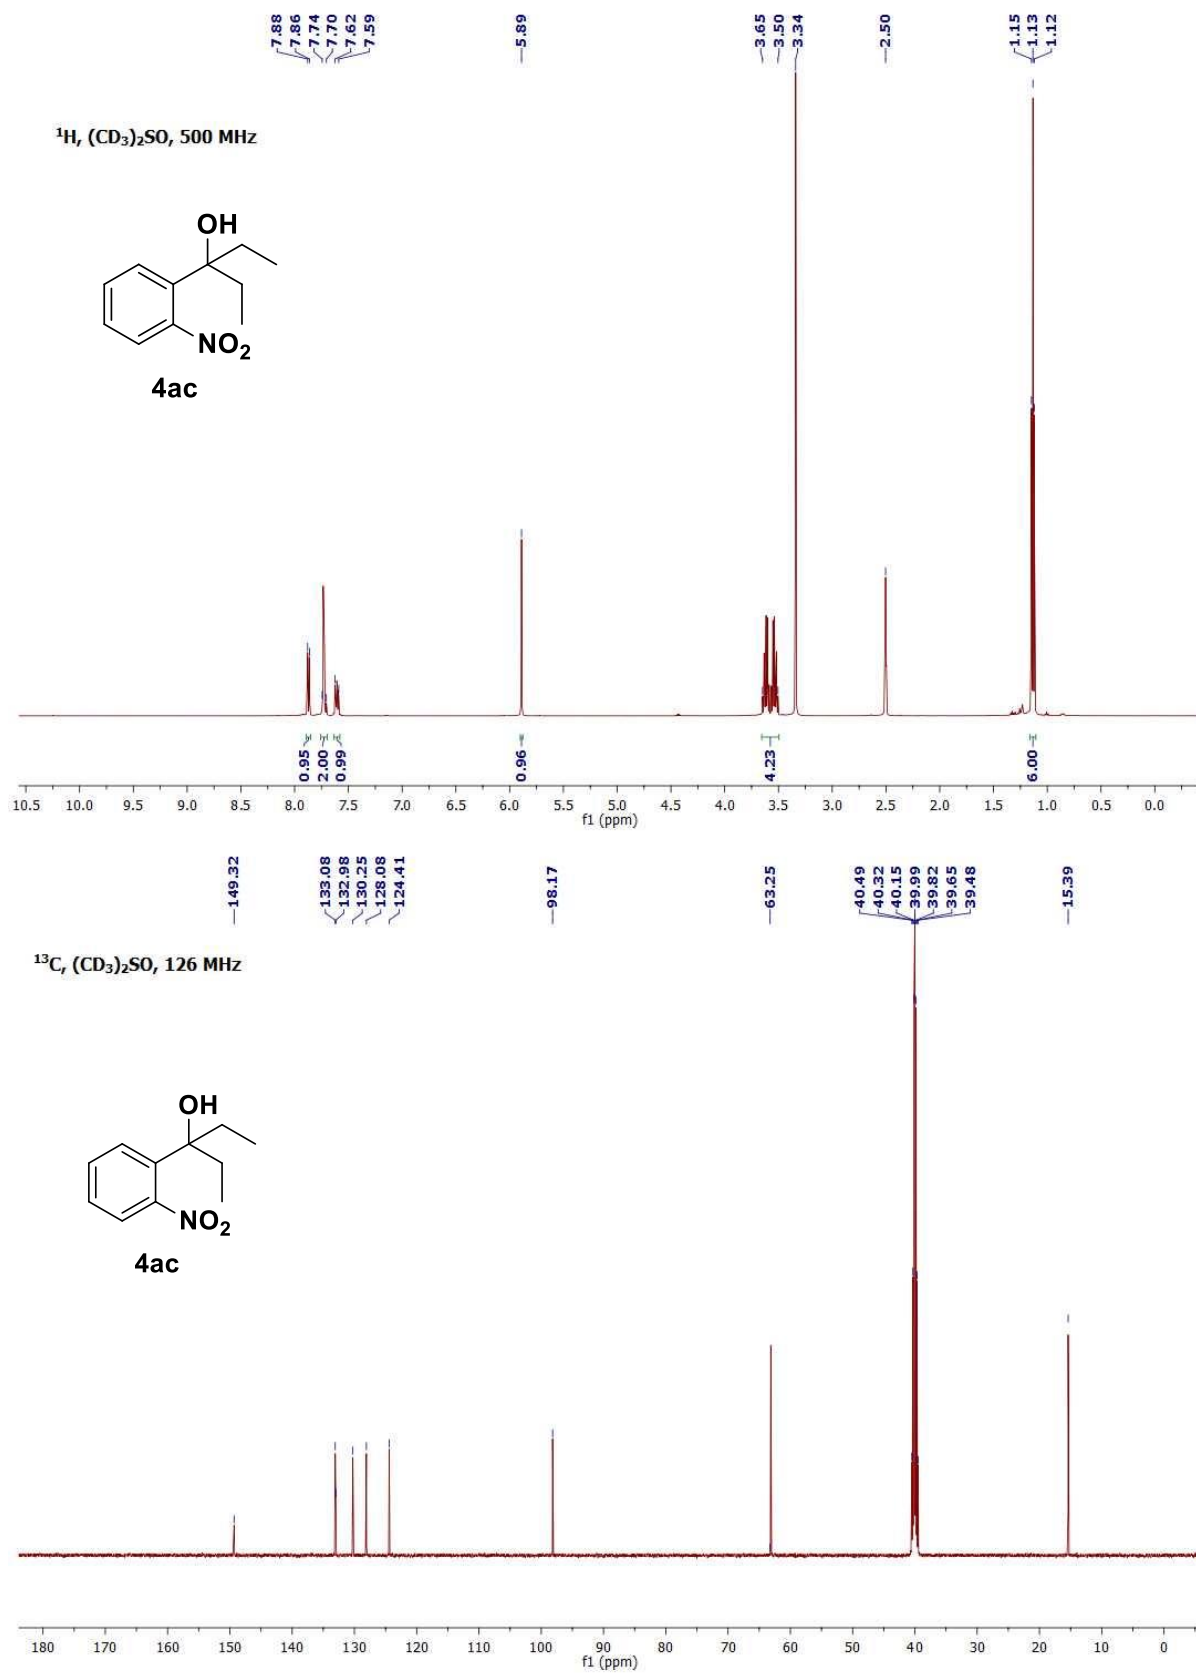

Figure S15: <sup>1</sup>H NMR and <sup>13</sup>C NMR Spectra of 3-(2-nitrophenyl)pentan-3-ol (4ac)



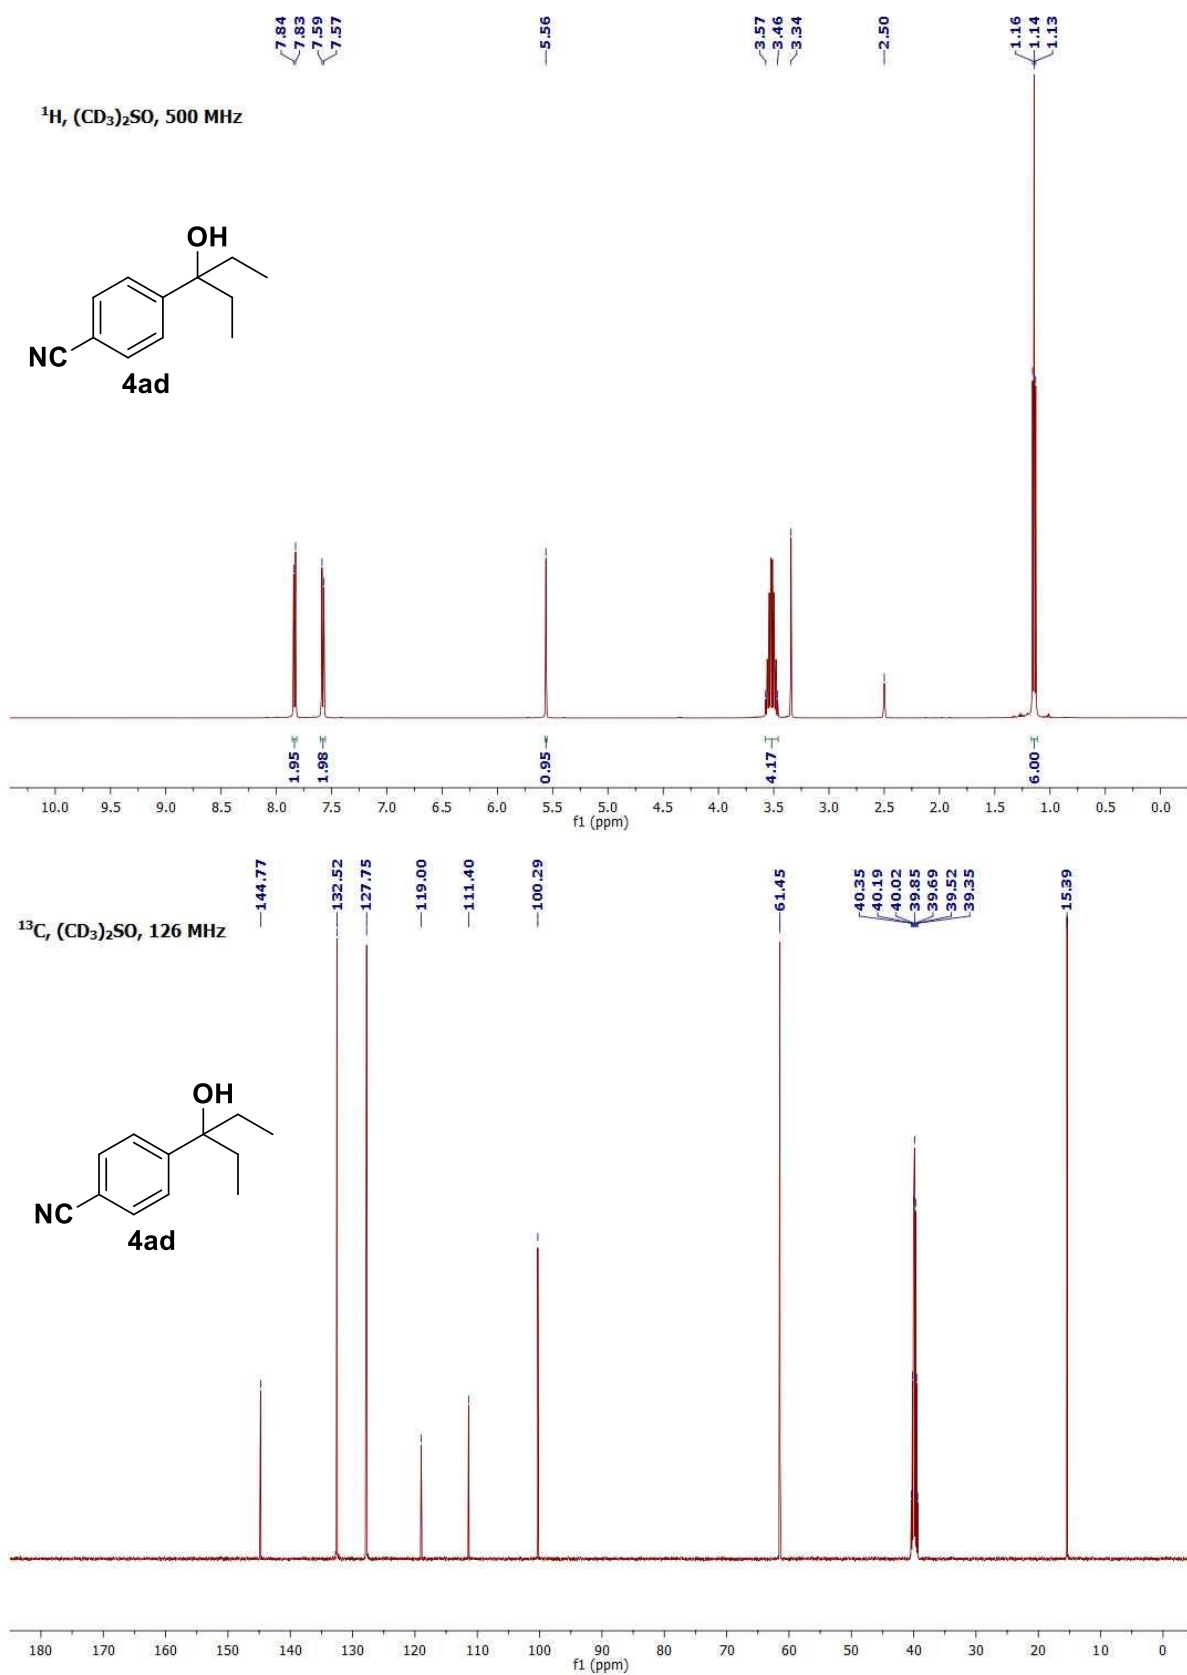

Figure S16: <sup>1</sup>H NMR and <sup>13</sup>C NMR Spectra of 4-(3-hydroxypentan-3-yl)benzonitrile (4ad)

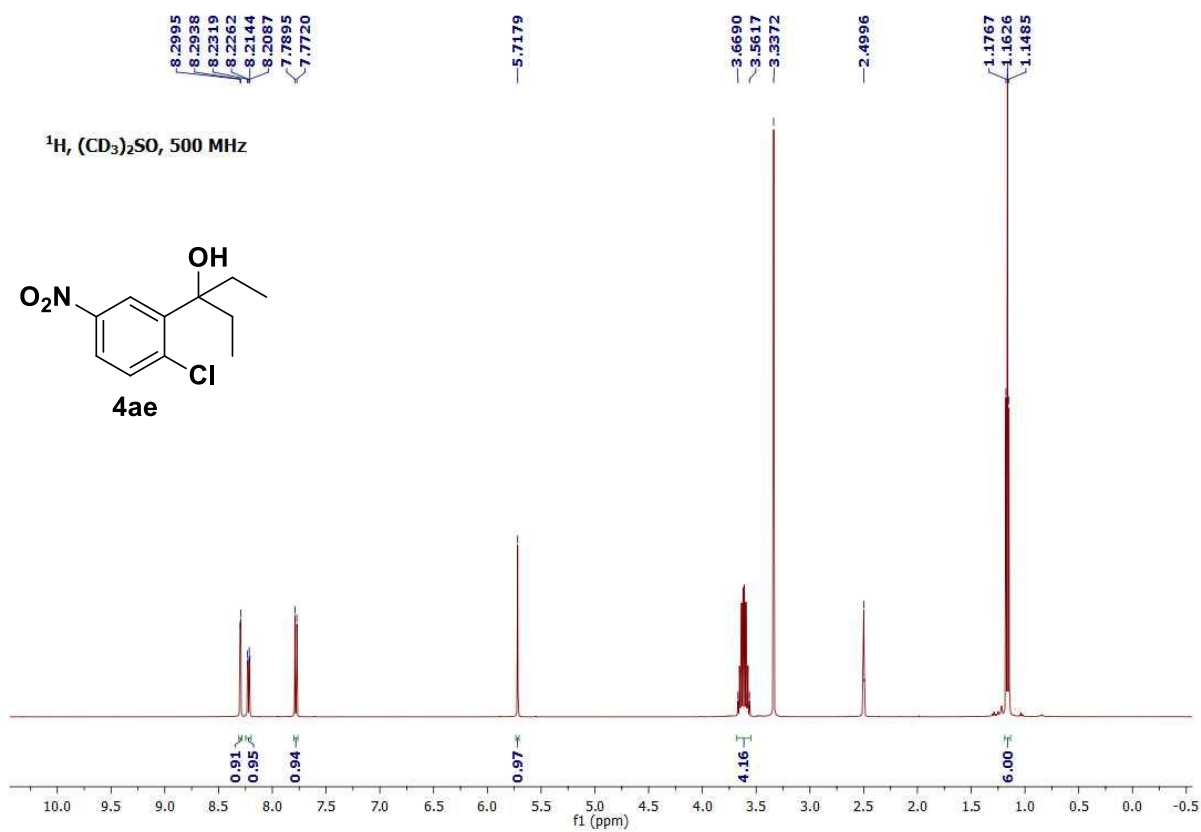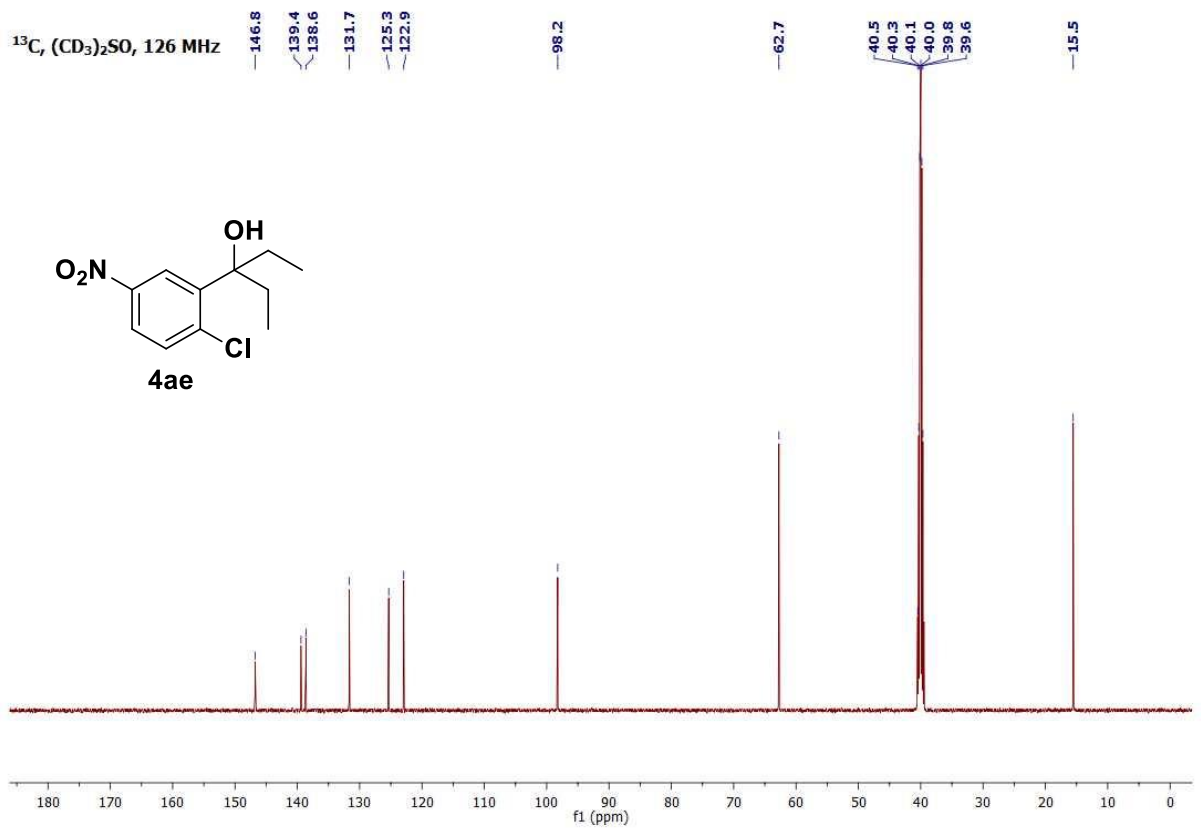

Figure S17: <sup>1</sup>H NMR and <sup>13</sup>C NMR Spectra of 3-(2-chloro-5-nitrophenyl)pentan-3-ol (4ae)

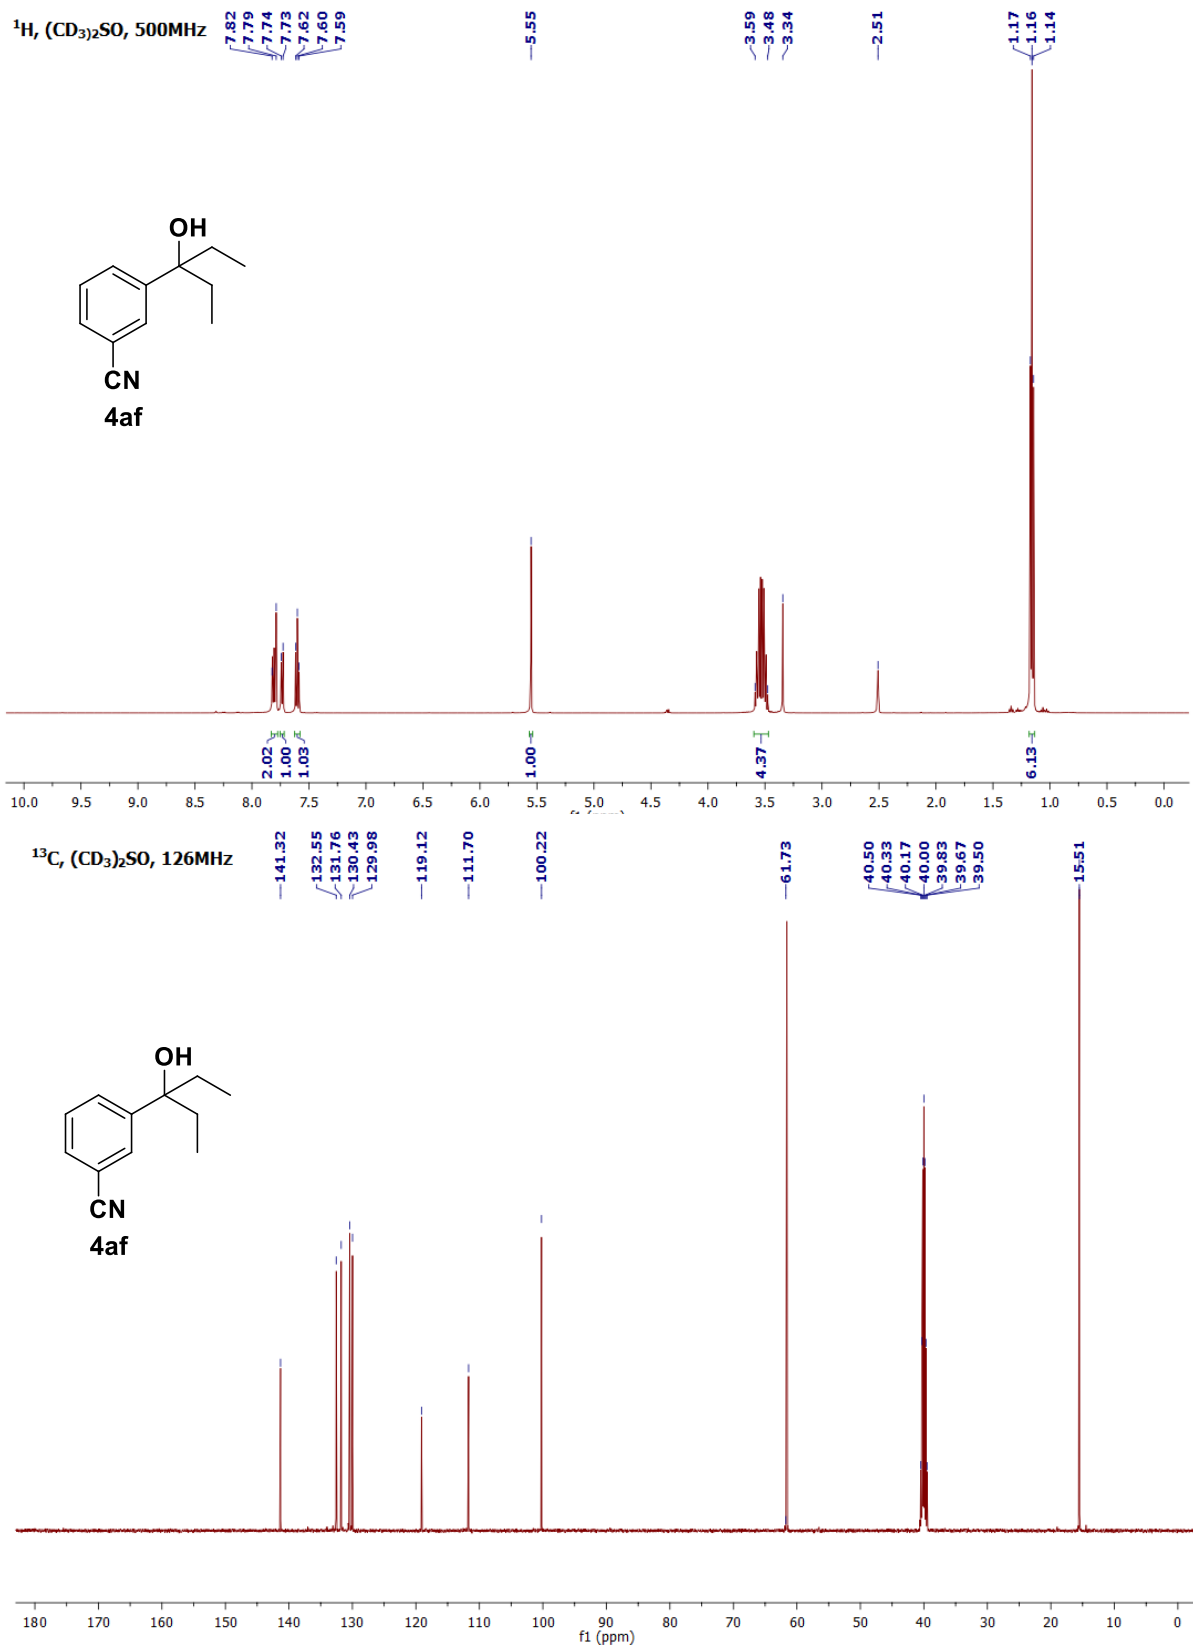

Figure S18: <sup>1</sup>H NMR and <sup>13</sup>C NMR Spectra of 3-(3-hydroxypentan-3-yl)benzonitrile (4af)

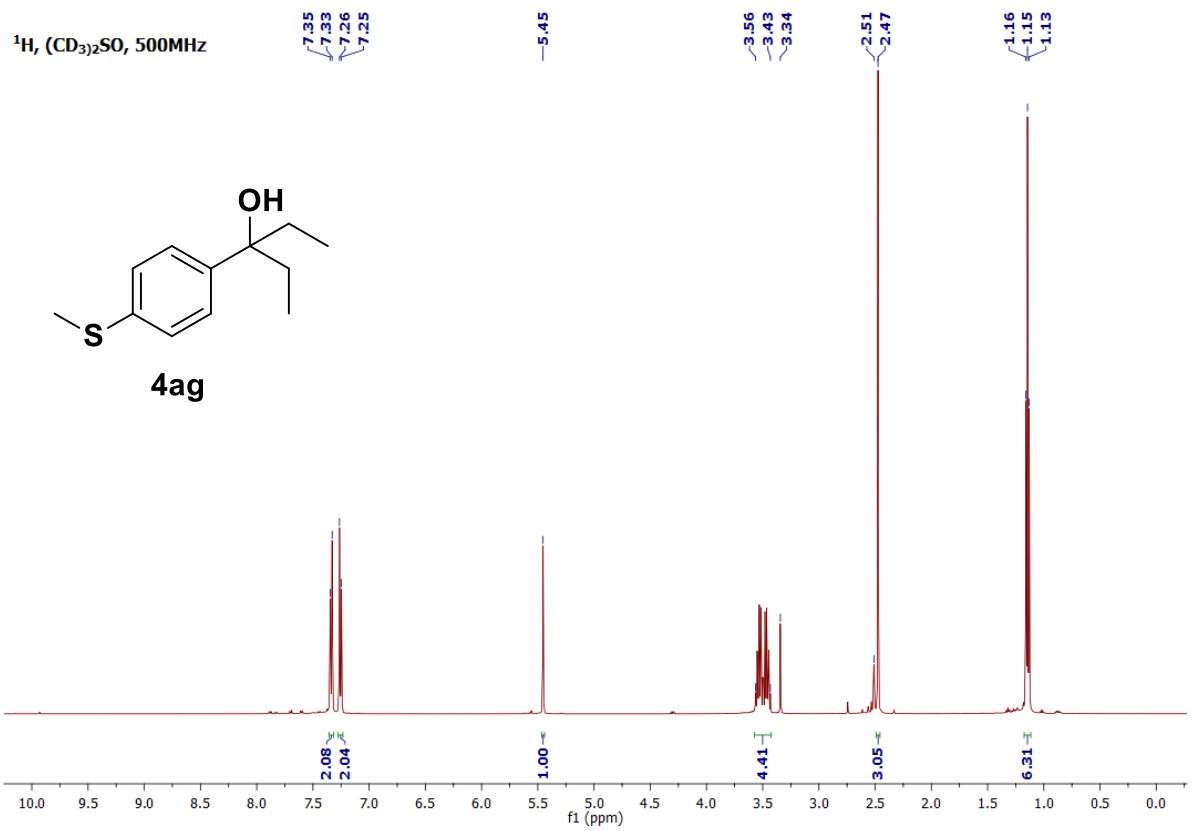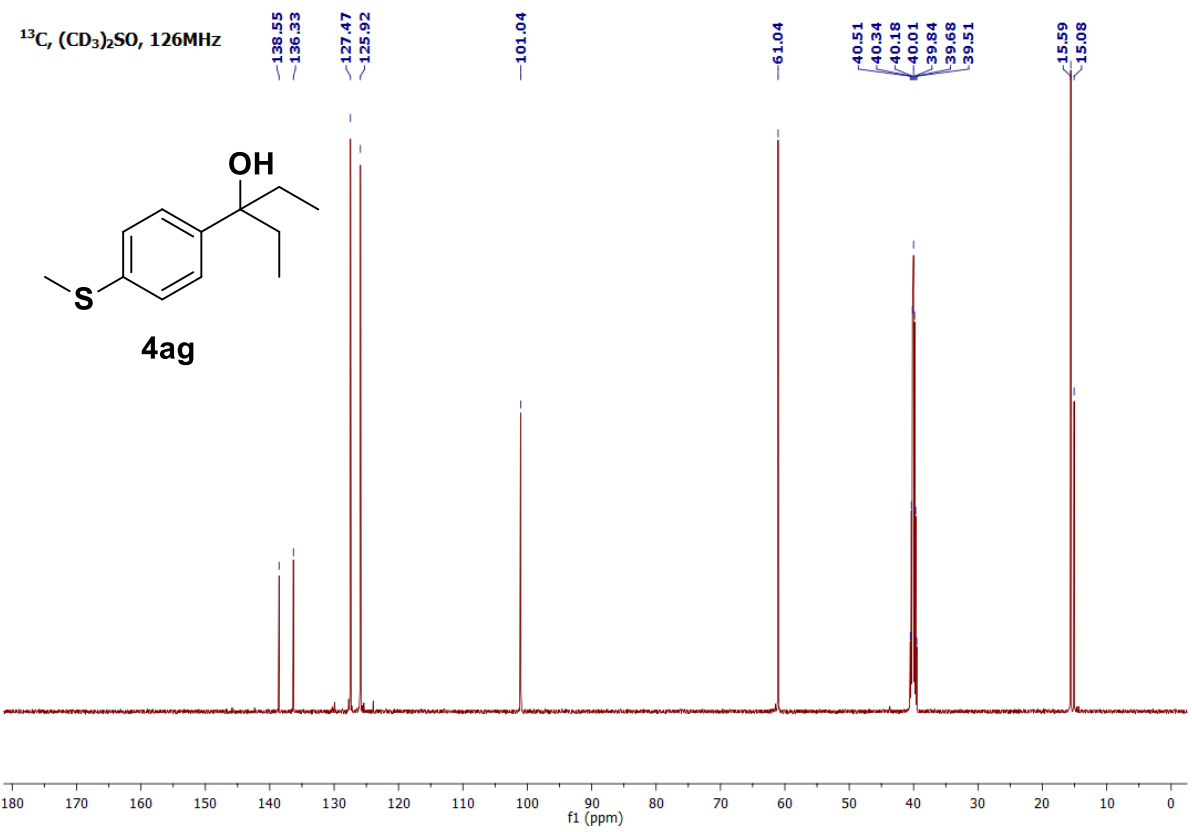

Figure S19: <sup>1</sup>H NMR and <sup>13</sup>C NMR Spectra of 3-(4-(methylthio)phenyl)pentan-3-ol (4ag)

## 8. $^1\text{H}$ NMR and $^{13}\text{C}$ NMR Spectra of Allylated Products

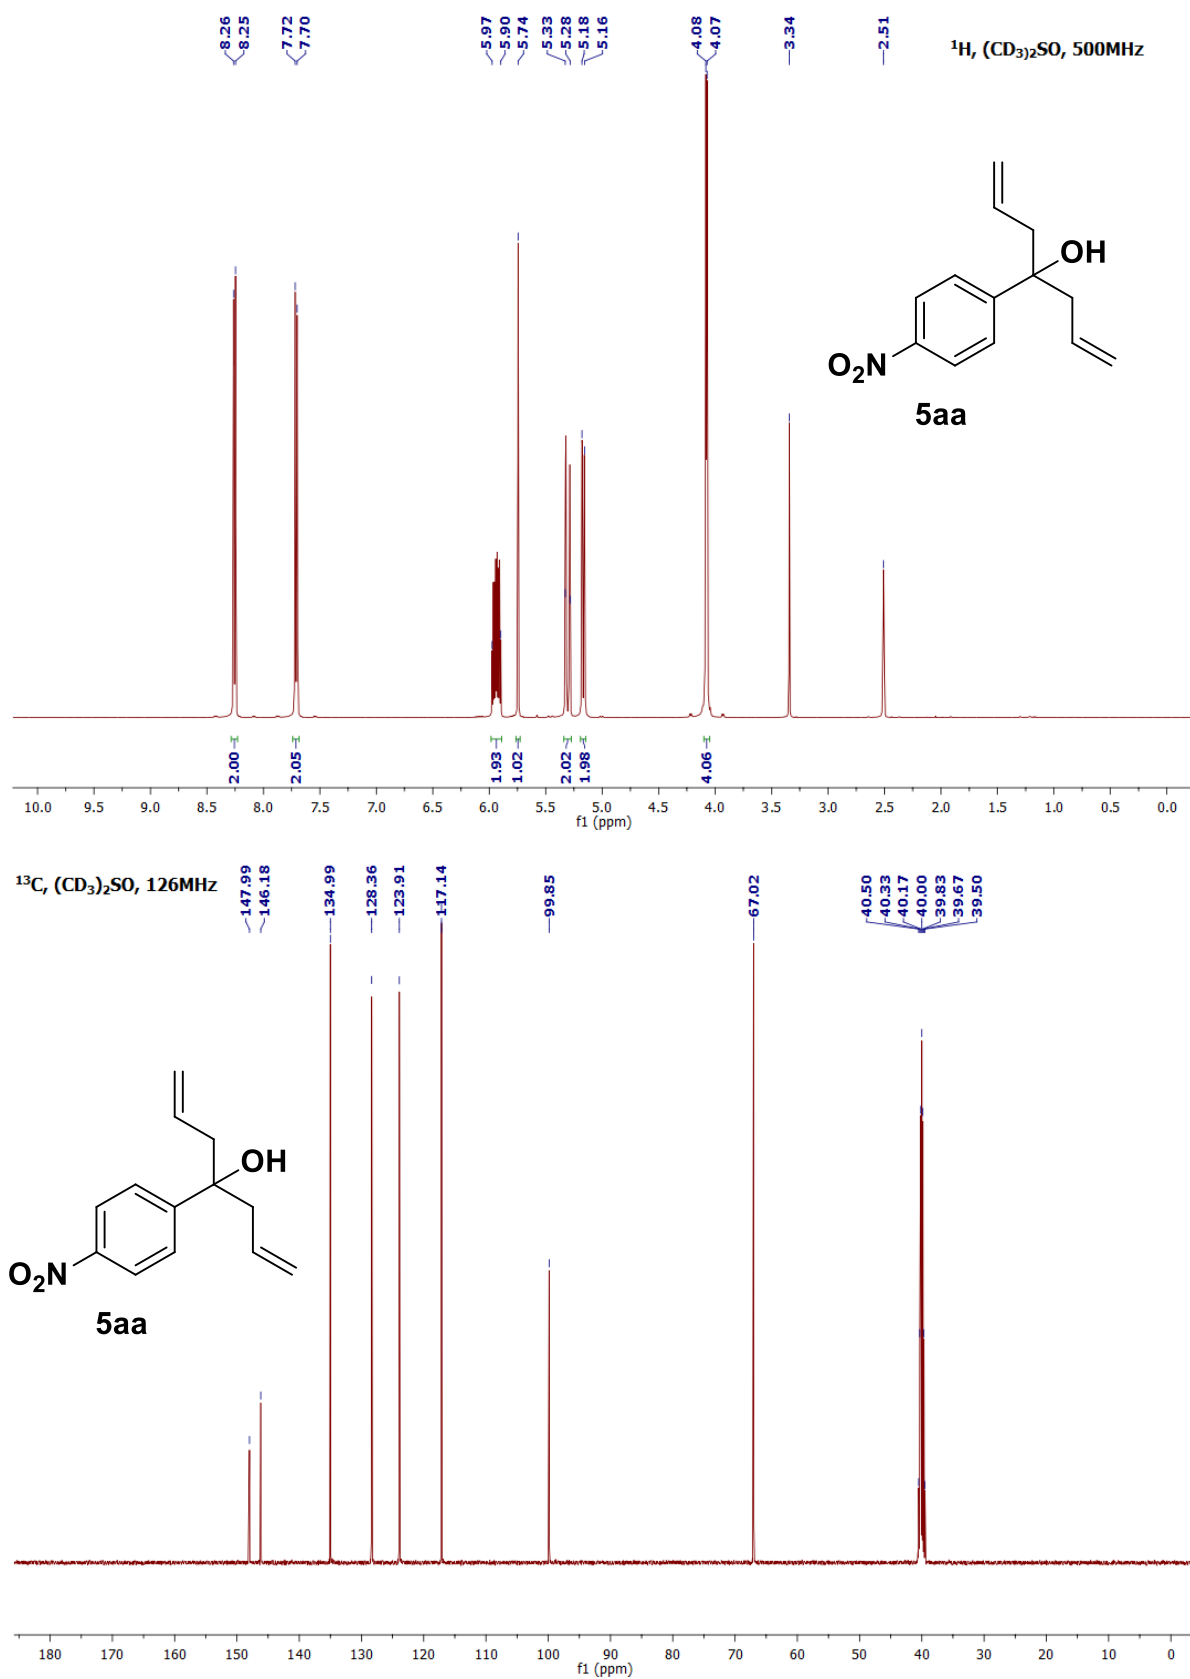

Figure S20:  $^1\text{H}$  NMR and  $^{13}\text{C}$  NMR Spectra of 4-(4-nitrophenyl)hepta-1,6-dien-4-ol (5aa)

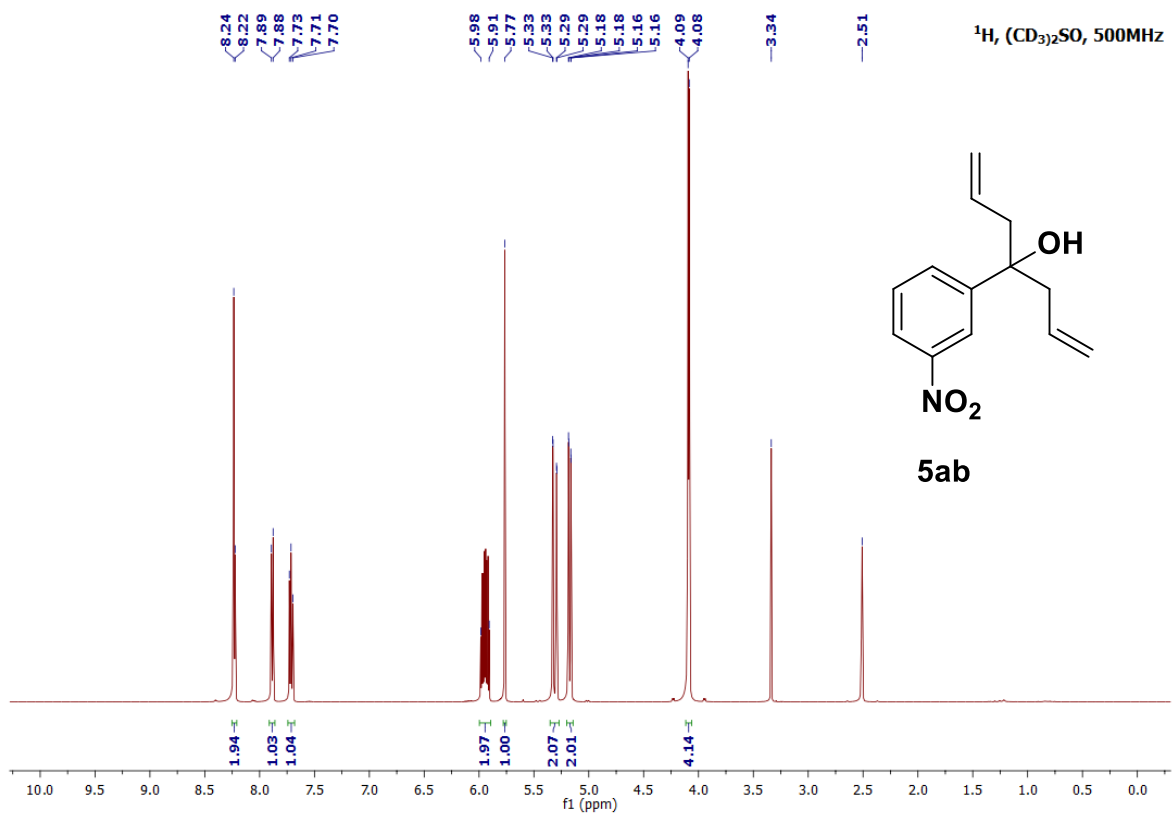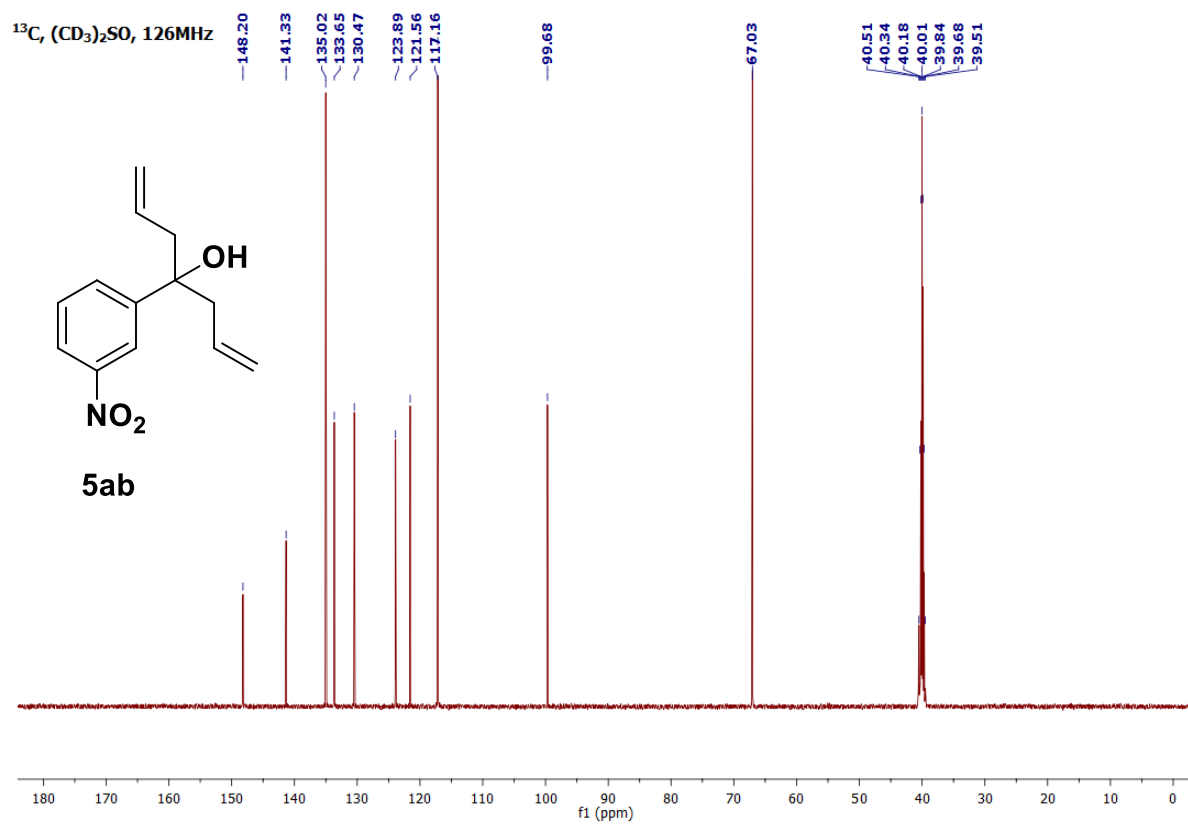

Figure S21: <sup>1</sup>H NMR and <sup>13</sup>C NMR Spectra of 4-(3-nitrophenyl)hepta-1,6-dien-4-ol (5ab)

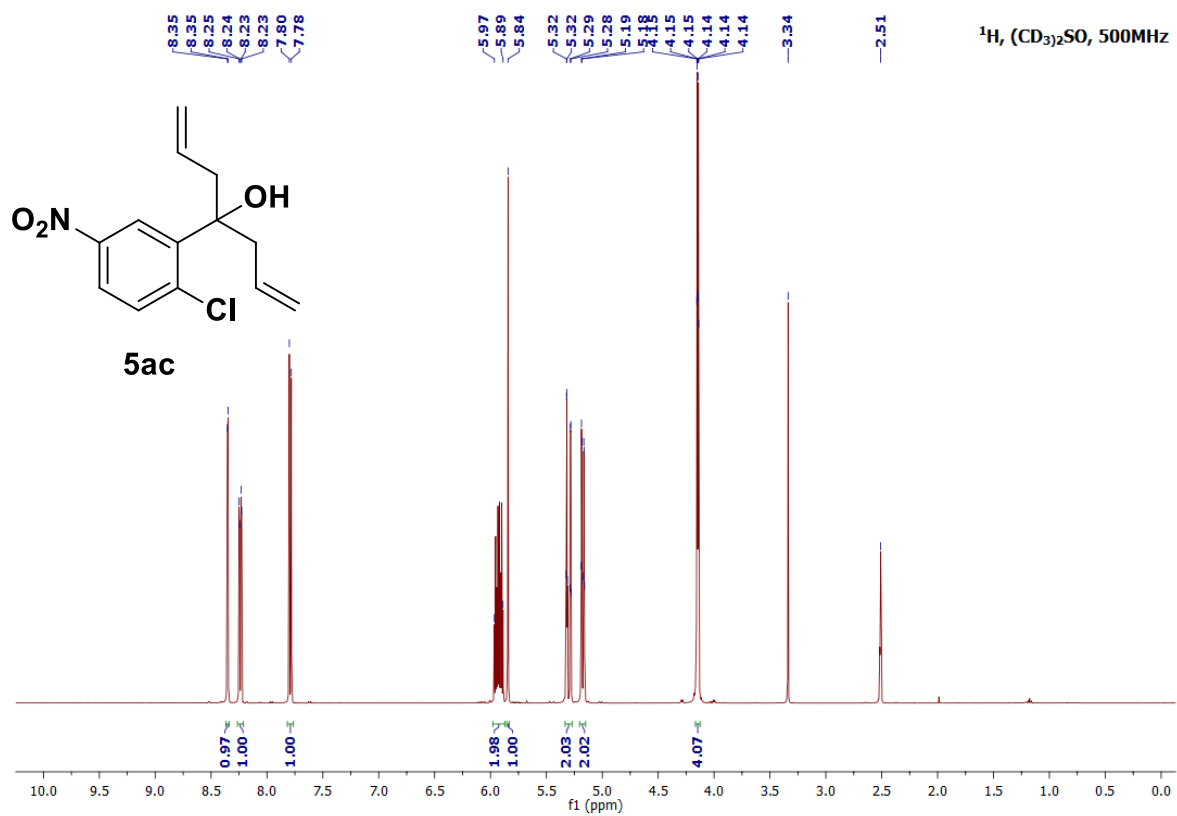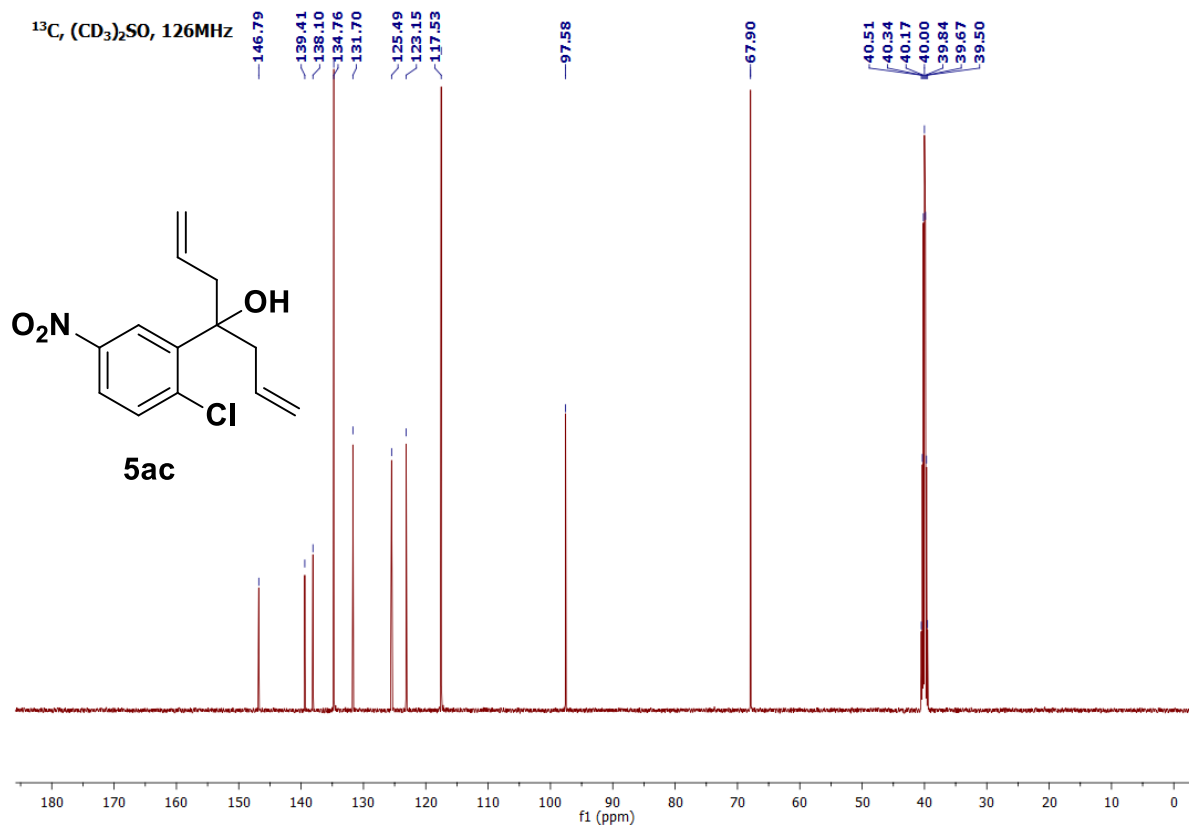

**Figure S22: <sup>1</sup>H NMR and <sup>13</sup>C NMR Spectra of 4-(2-chloro-5-nitrophenyl)hepta-1,6-dien-4-ol (5ac)**

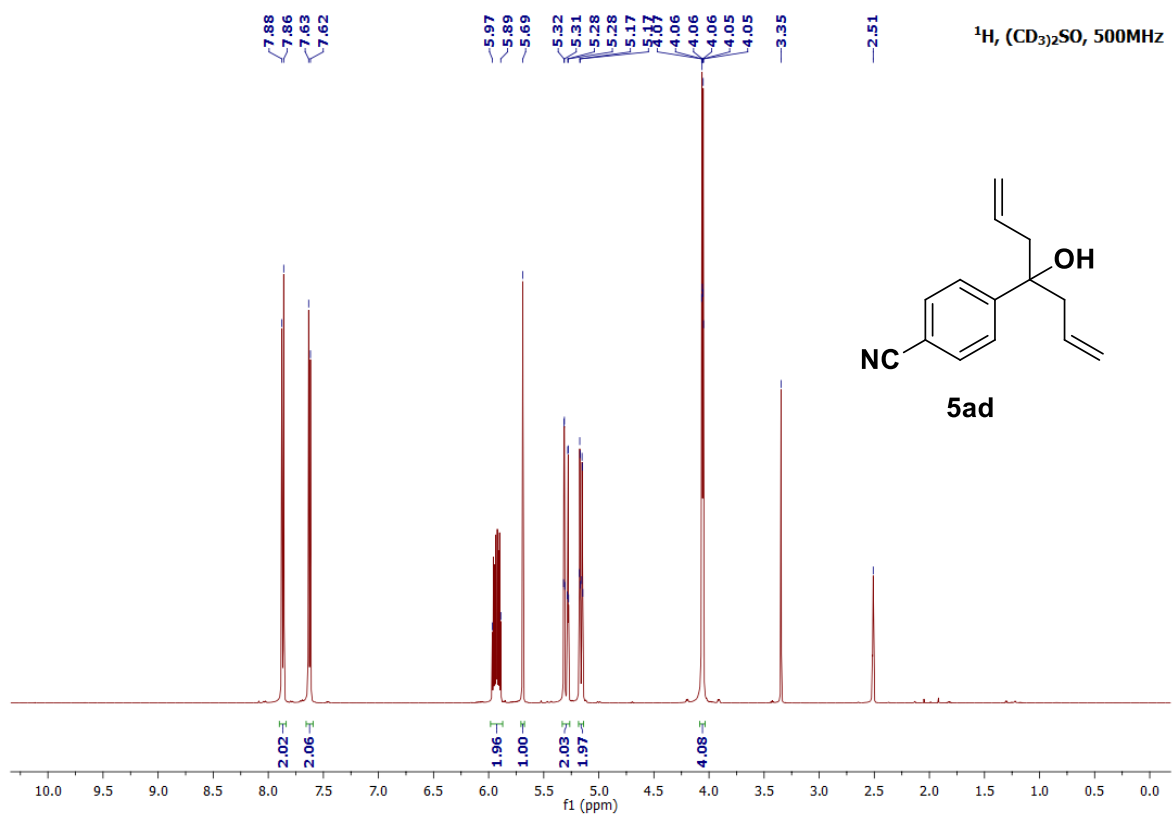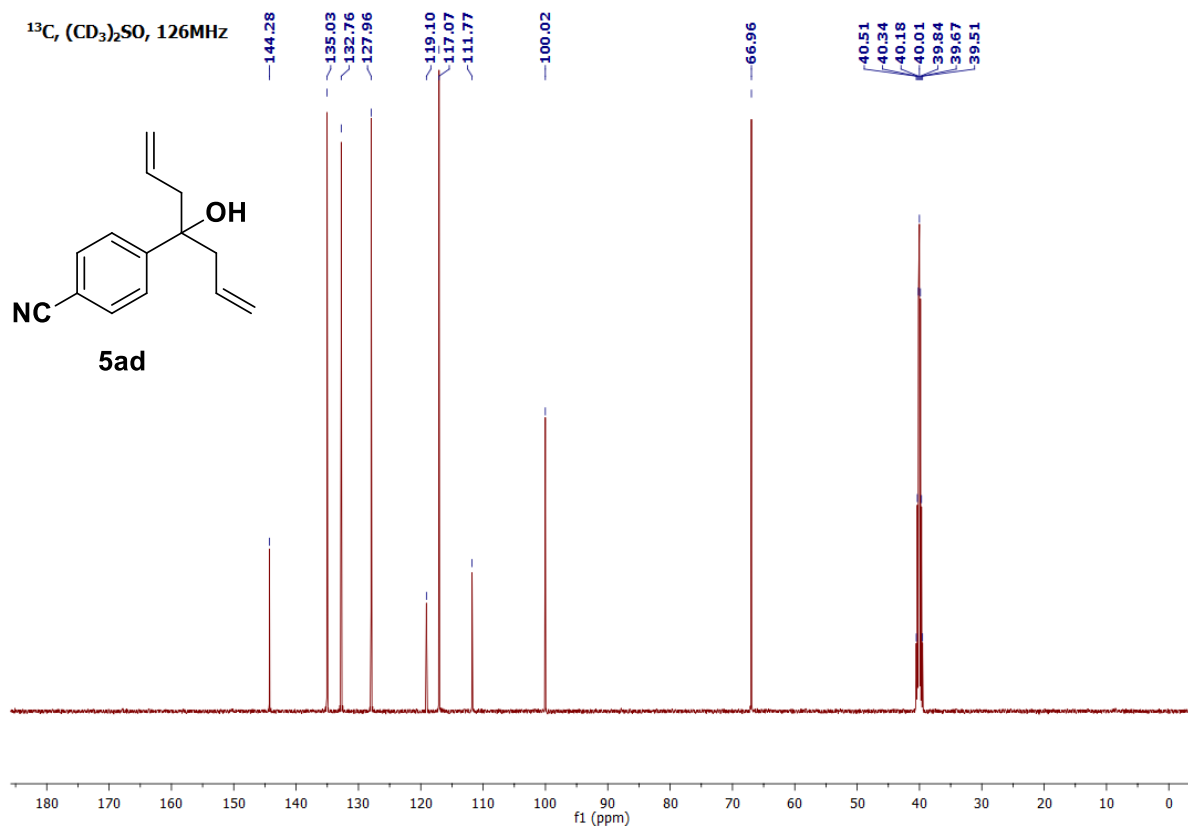

Figure S23: <sup>1</sup>H NMR and <sup>13</sup>C NMR Spectra of 4-(4-hydroxyhepta-1,6-dien-4-yl) benzonitrile (5ad)



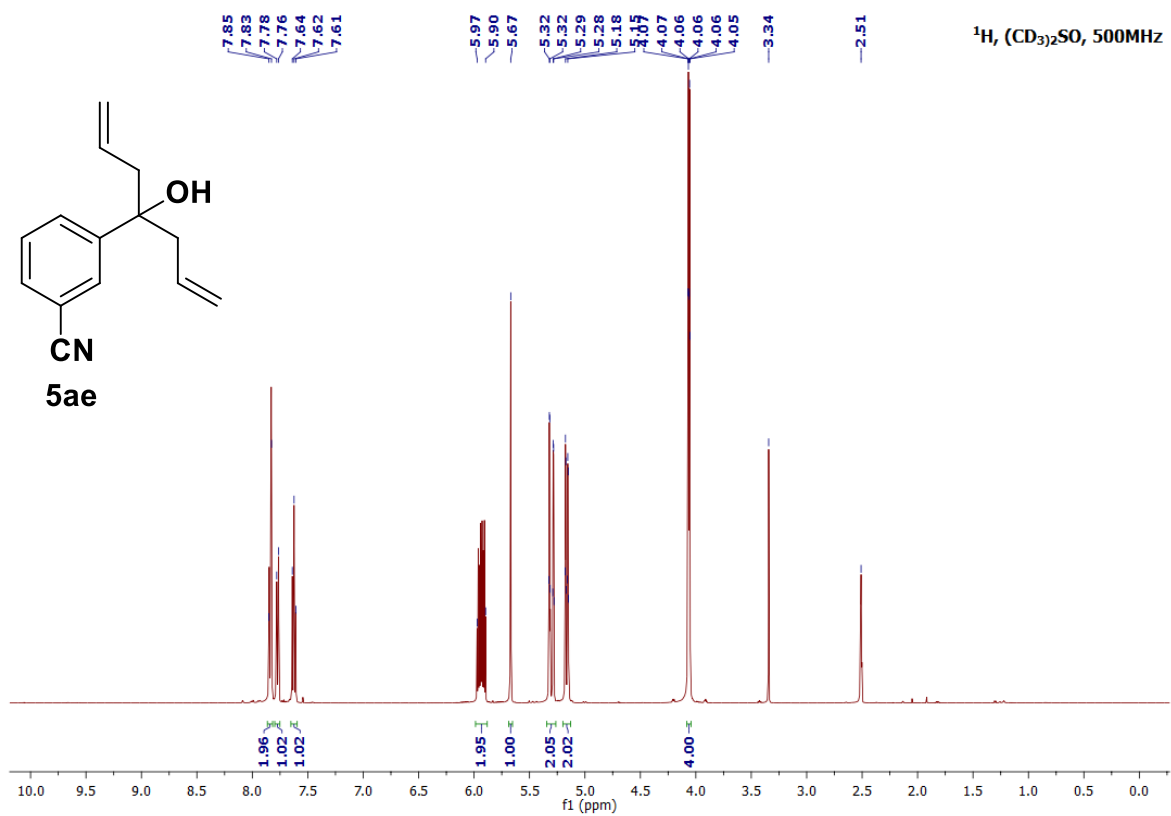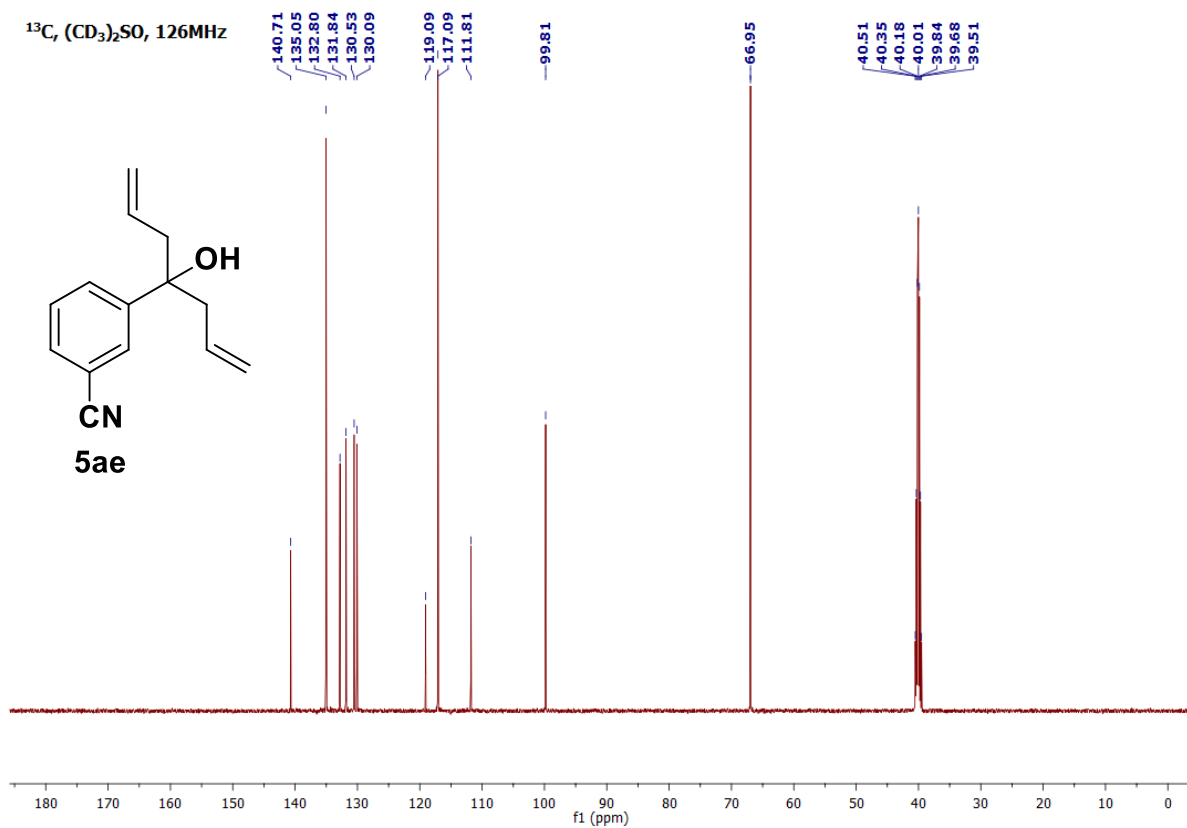

**Figure S24: <sup>1</sup>H NMR and <sup>13</sup>C NMR Spectra of 3-(4-hydroxyhepta-1,6-dien-4-yl) benzonitrile (5ae)**

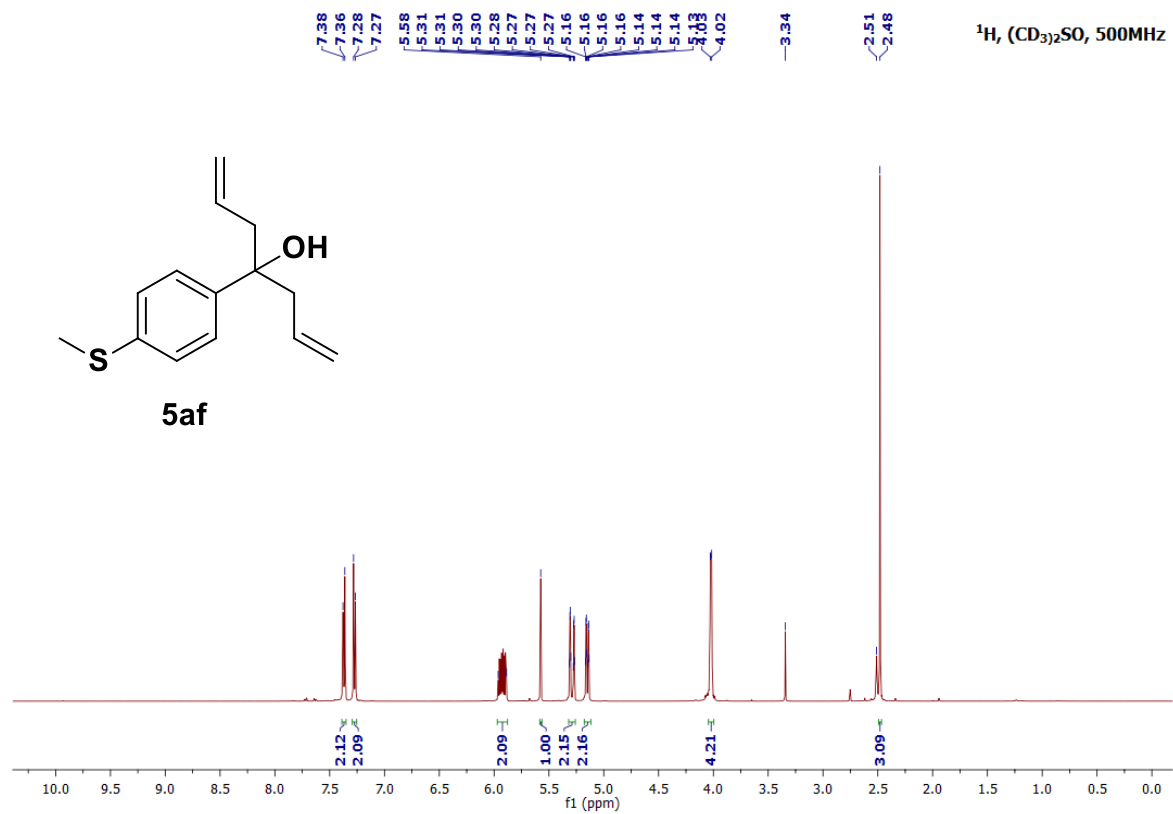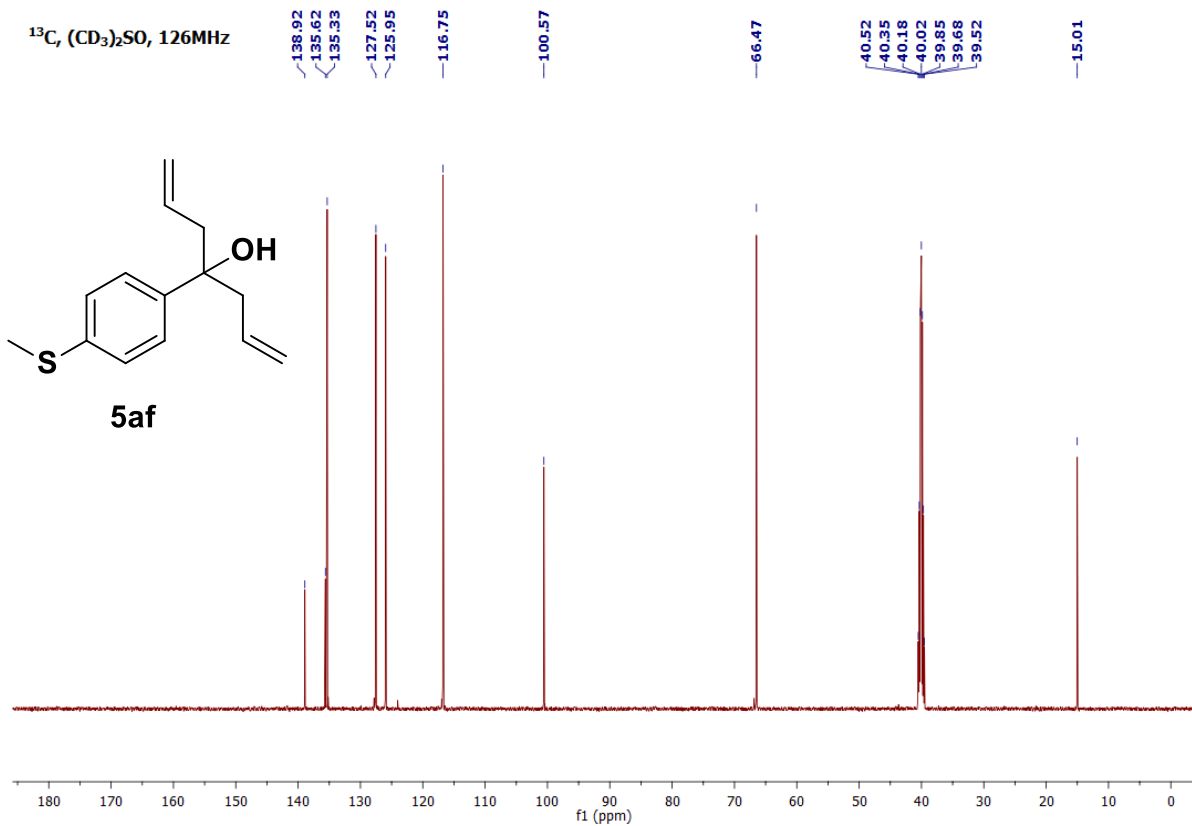

**Figure S25: <sup>1</sup>H NMR and <sup>13</sup>C NMR Spectra of 4-(4-(methylthio)phenyl)hepta-1,6-dien-4-ol (5af)**

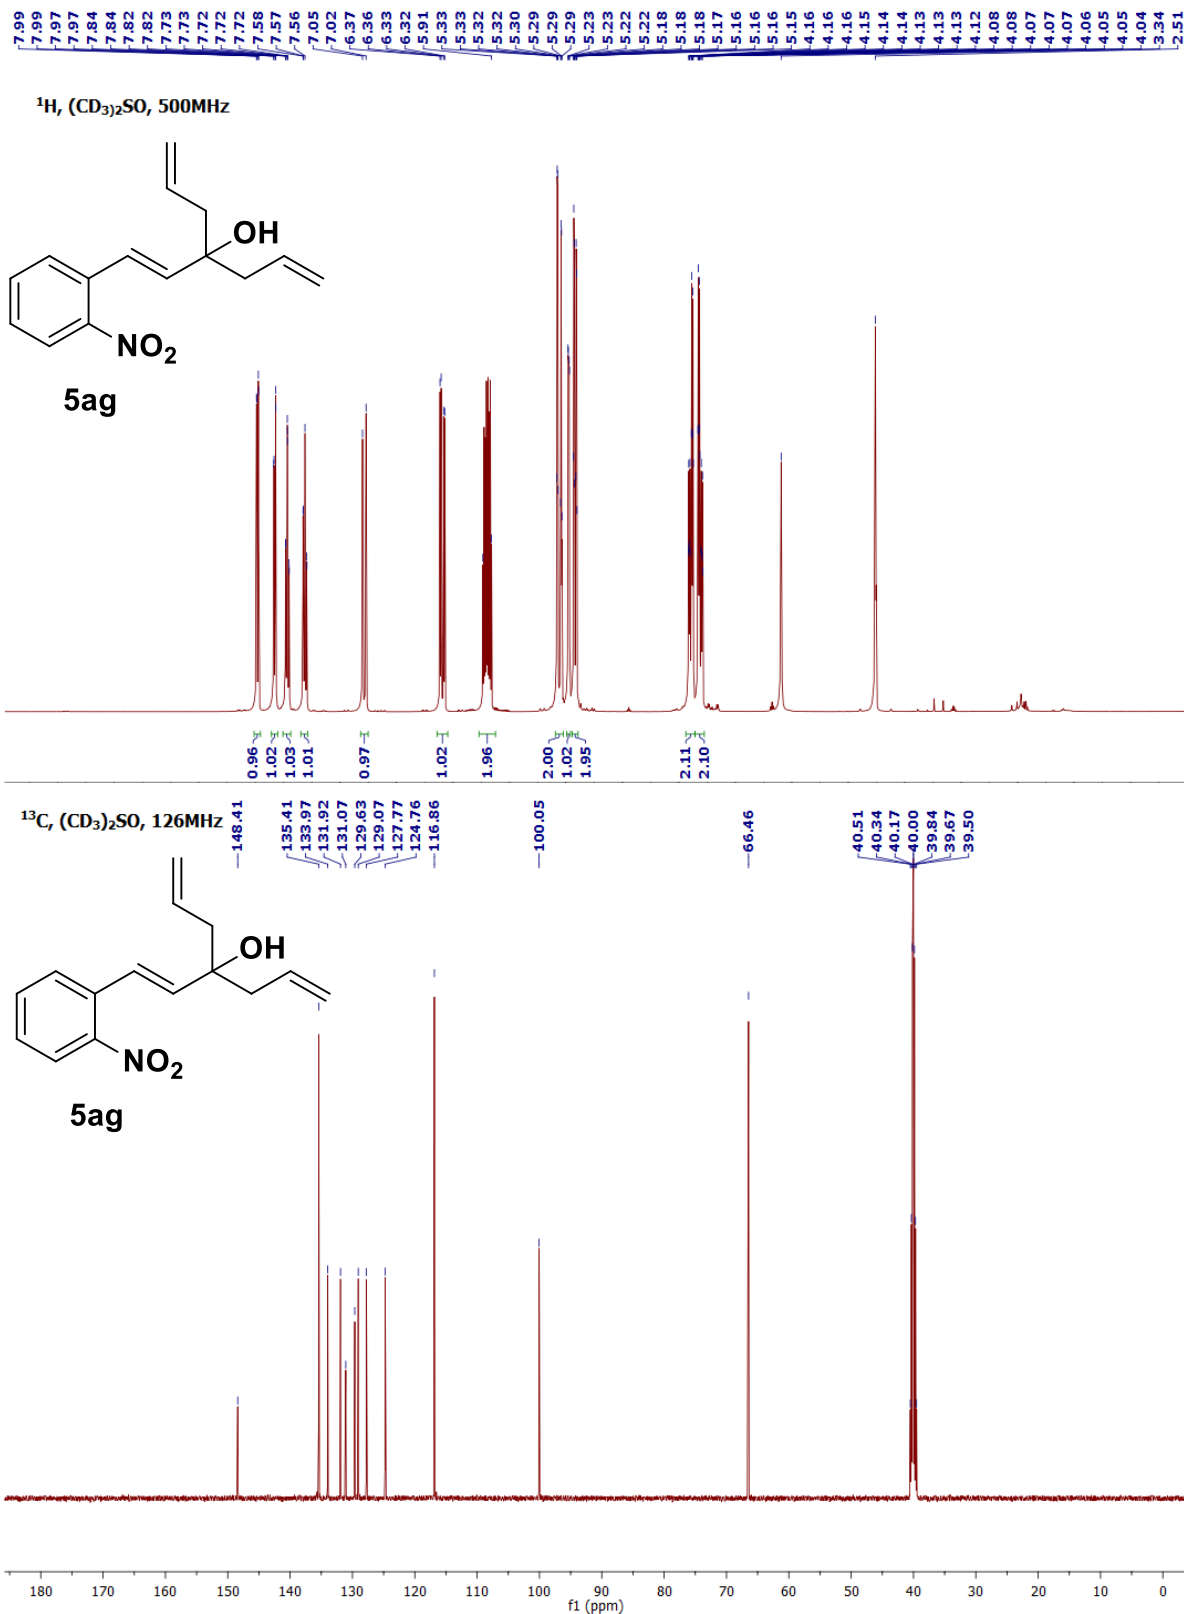

**Figure S26: <sup>1</sup>H NMR and <sup>13</sup>C NMR Spectra of (*E*)-4-(2-nitrostyryl)hepta-1,6-dien-4-ol (5ag)**

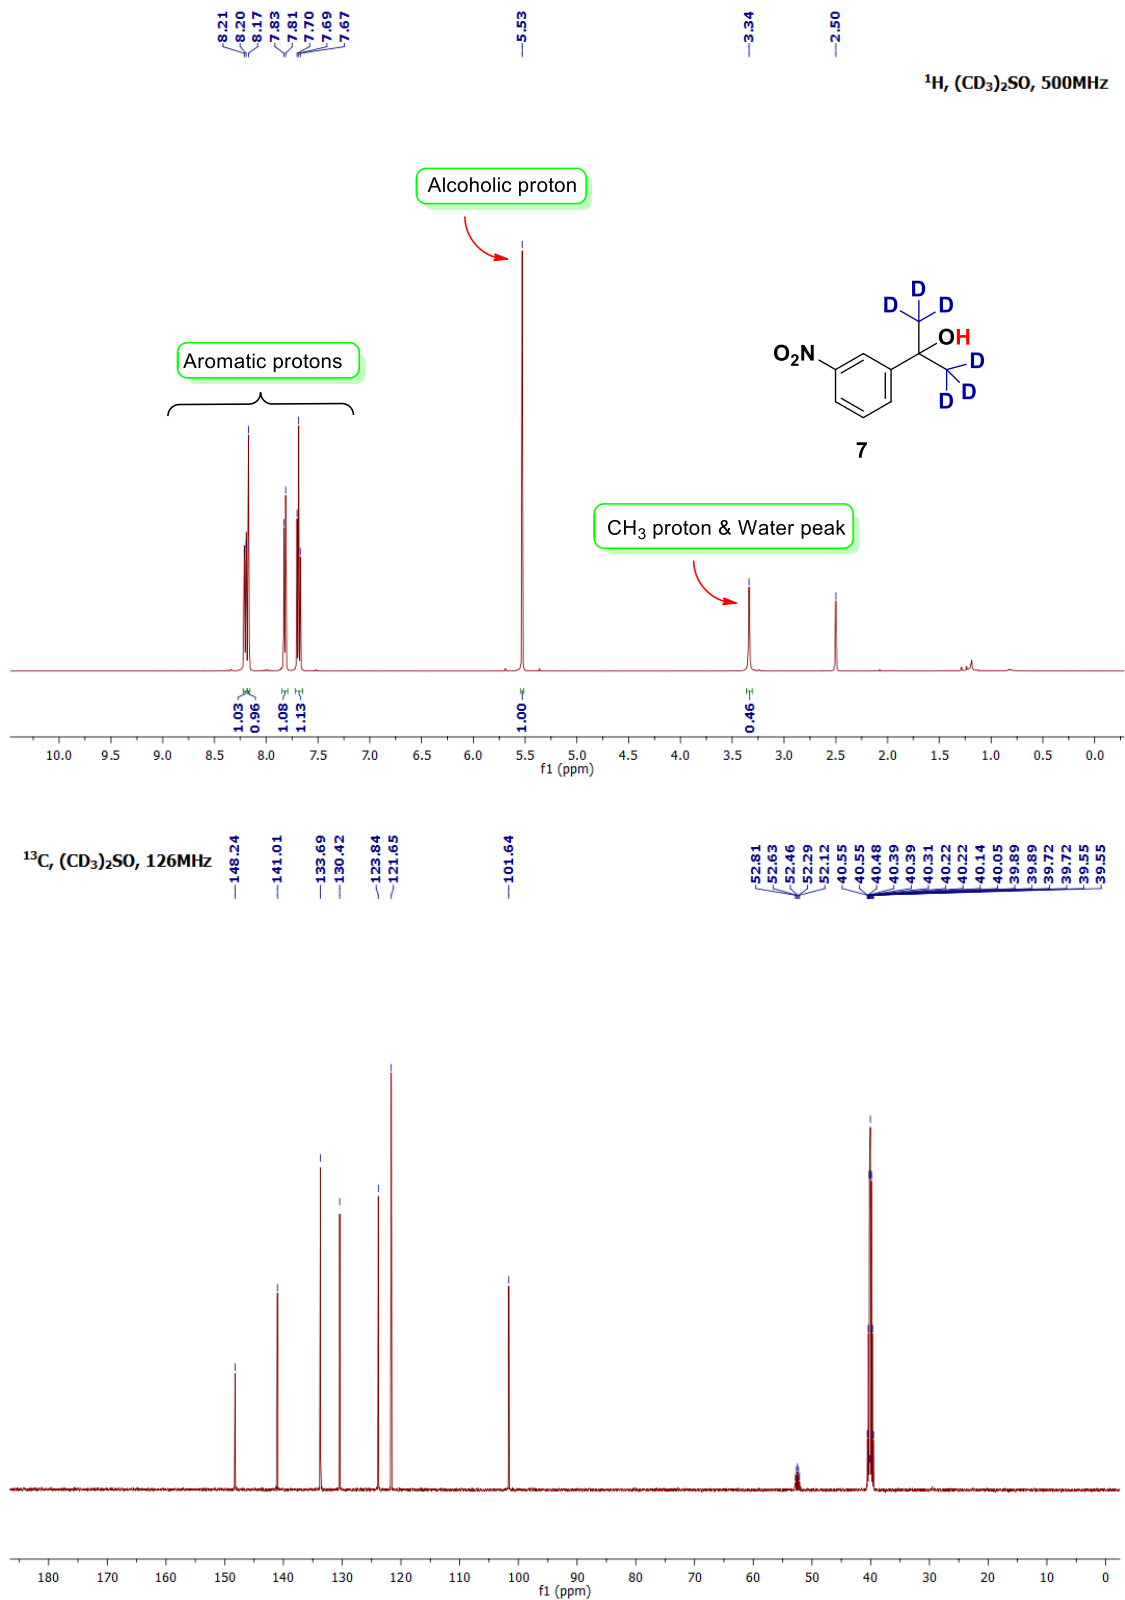

Figure S27:  $^1\text{H}$  NMR and  $^{13}\text{C}$  NMR Spectra of 3ab (recorded in  $\text{DMSO}-d^6$ )

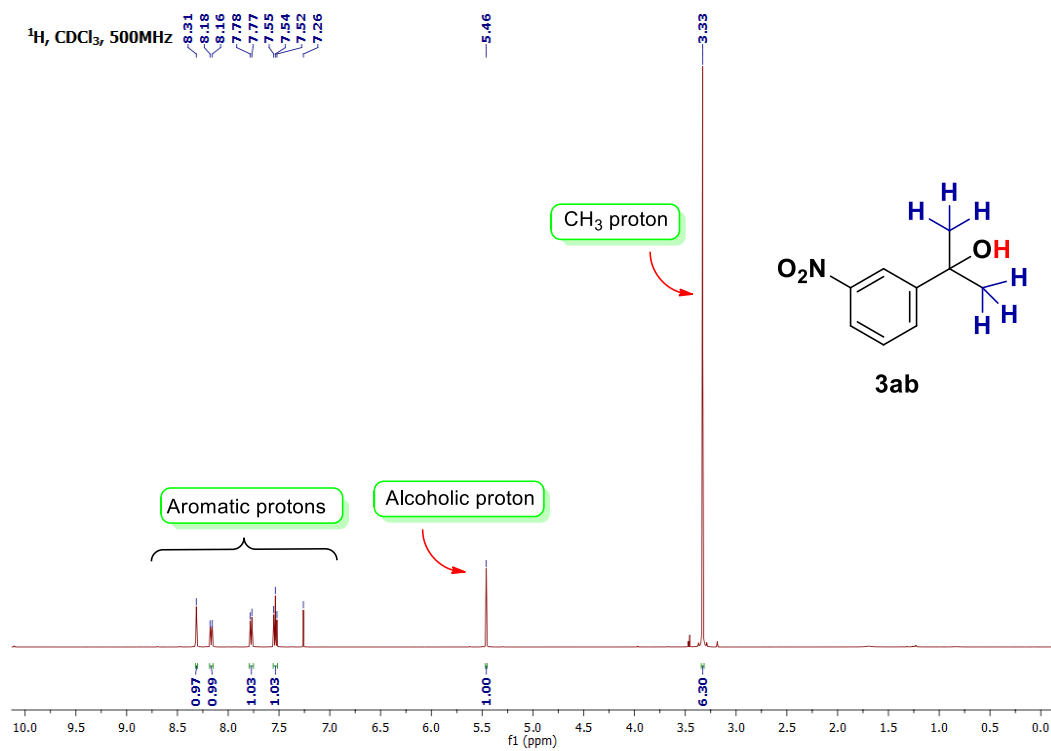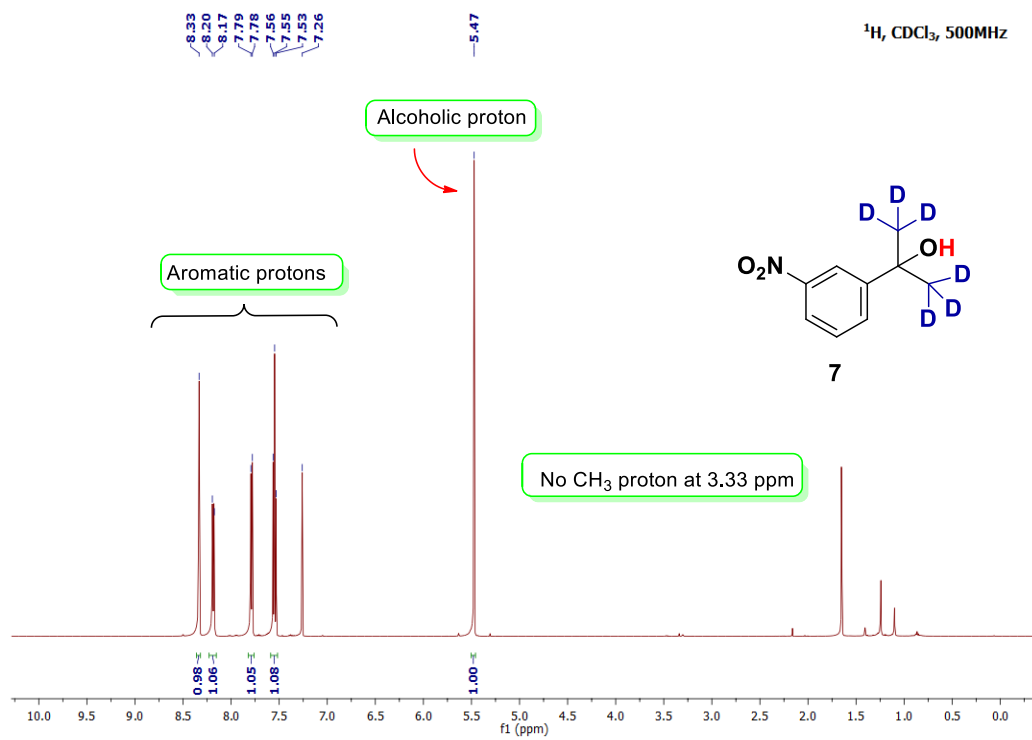

Figure S28:  $^1\text{H}$  NMR Spectra of **3ab** and **7** (recorded in  $\text{CDCl}_3$ )

## HR-MS Spectra of the Products

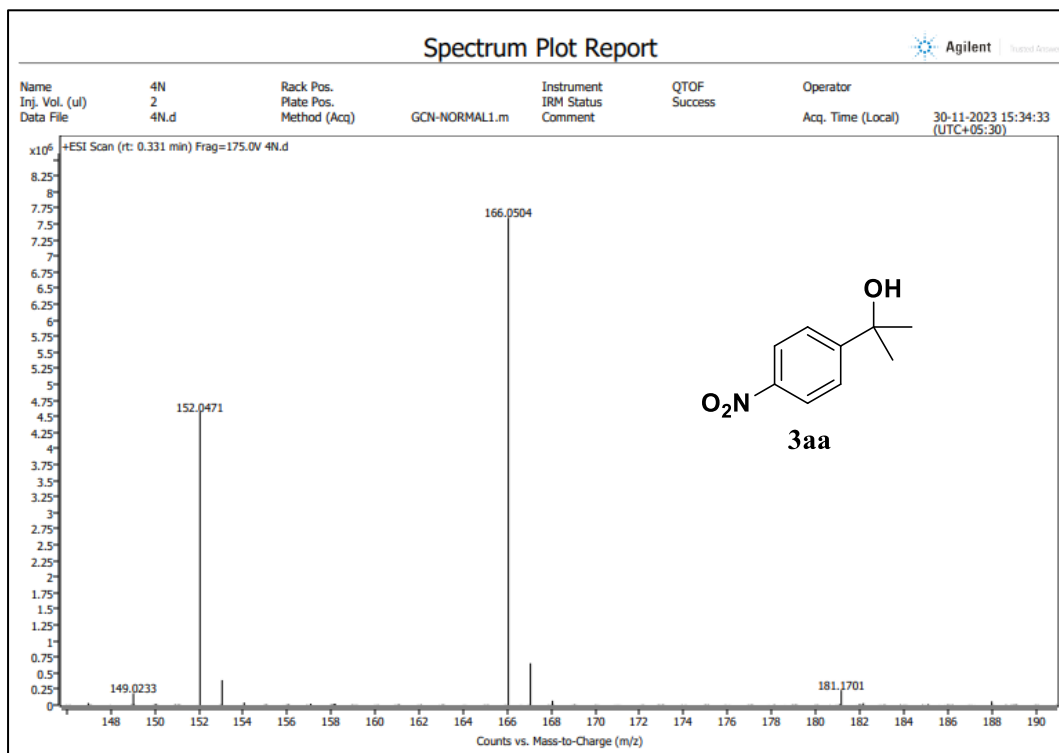

Figure S29: HR-MS Spectrum of 3aa

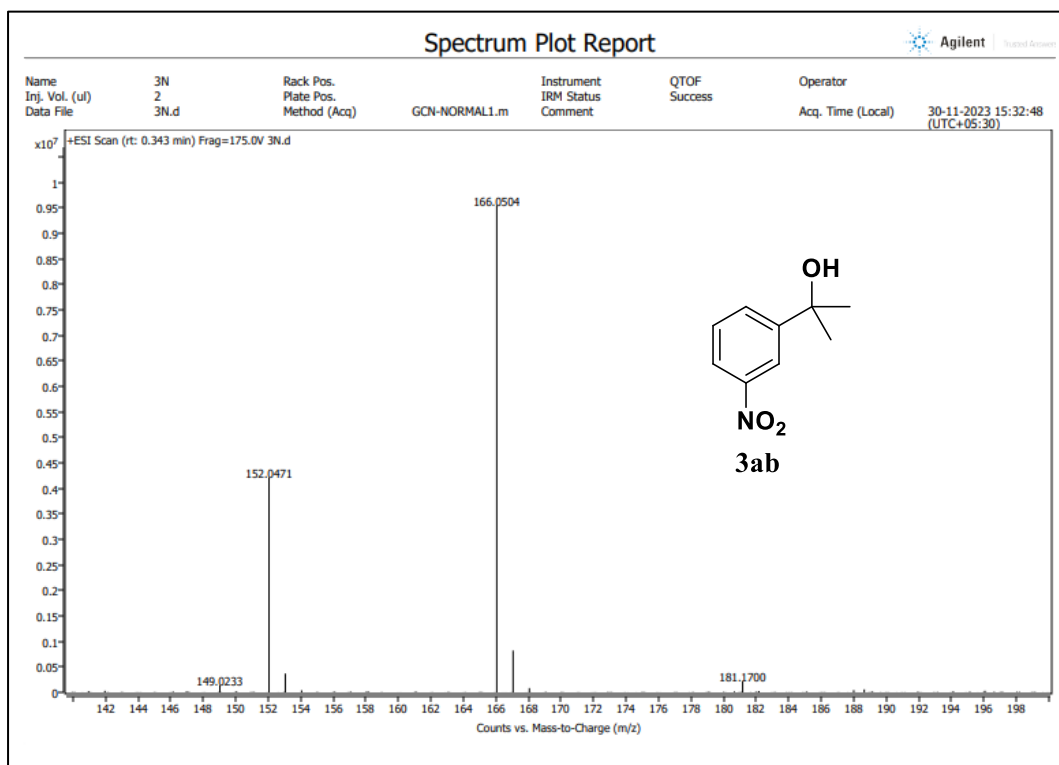

Figure S30: HR-MS Spectrum of 3ab

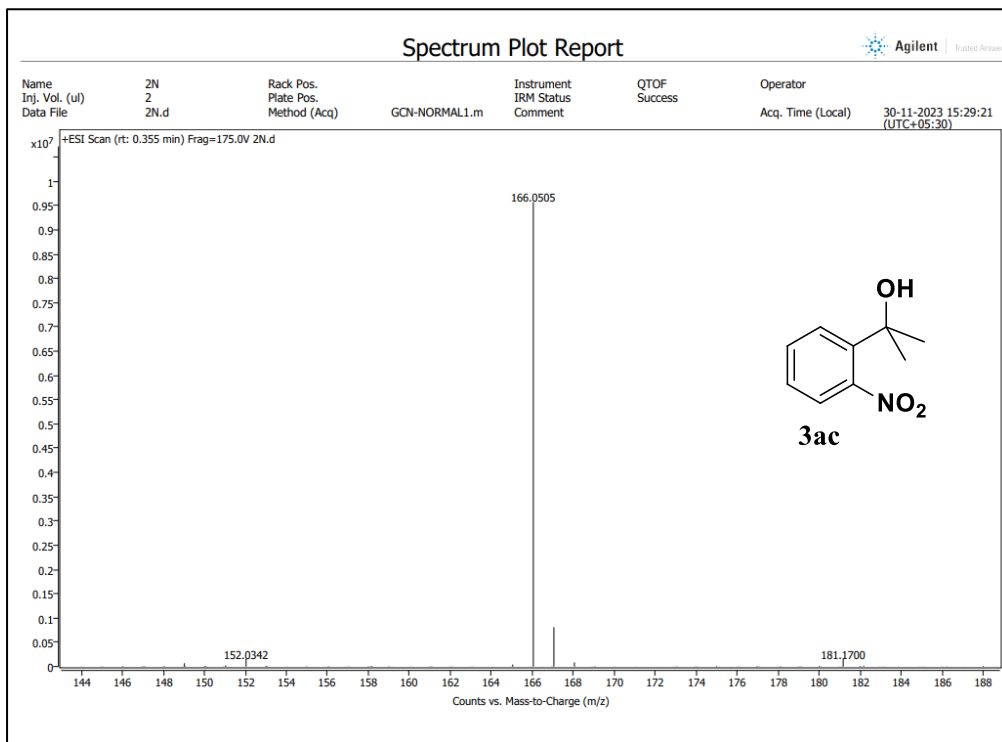

**Figure S31: HR-MS Spectrum of 3ac.**

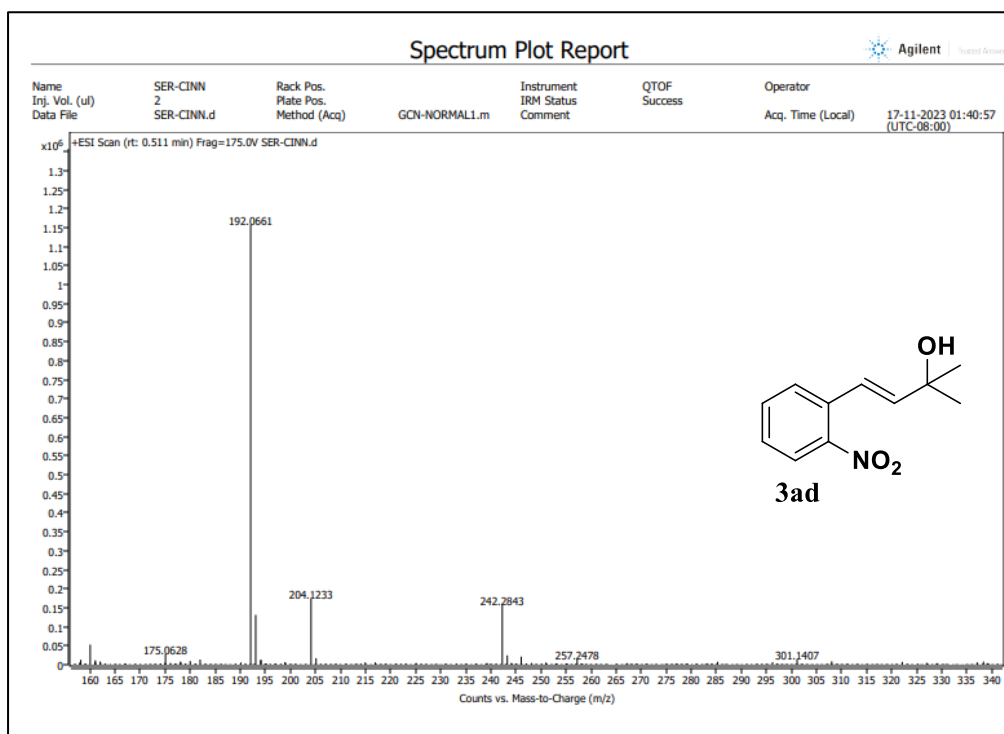

**Figure S32: HR-MS Spectrum of 3ad.**

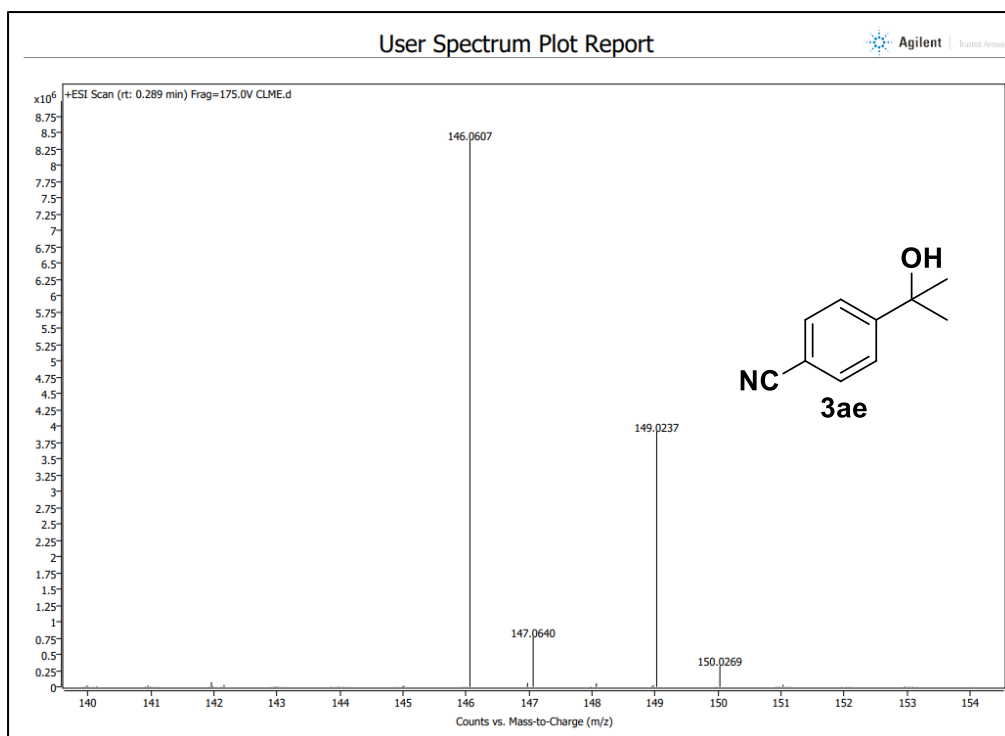

**Figure S33: HR-MS Spectrum of 3ae.**

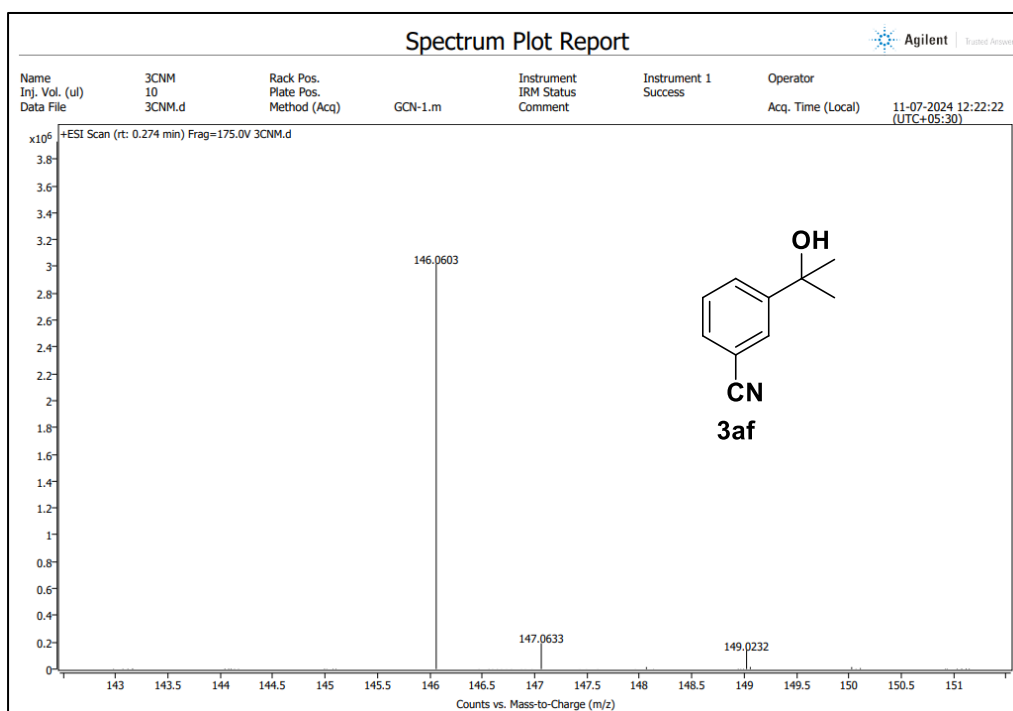

**Figure S34: HR-MS Spectrum of 3af**



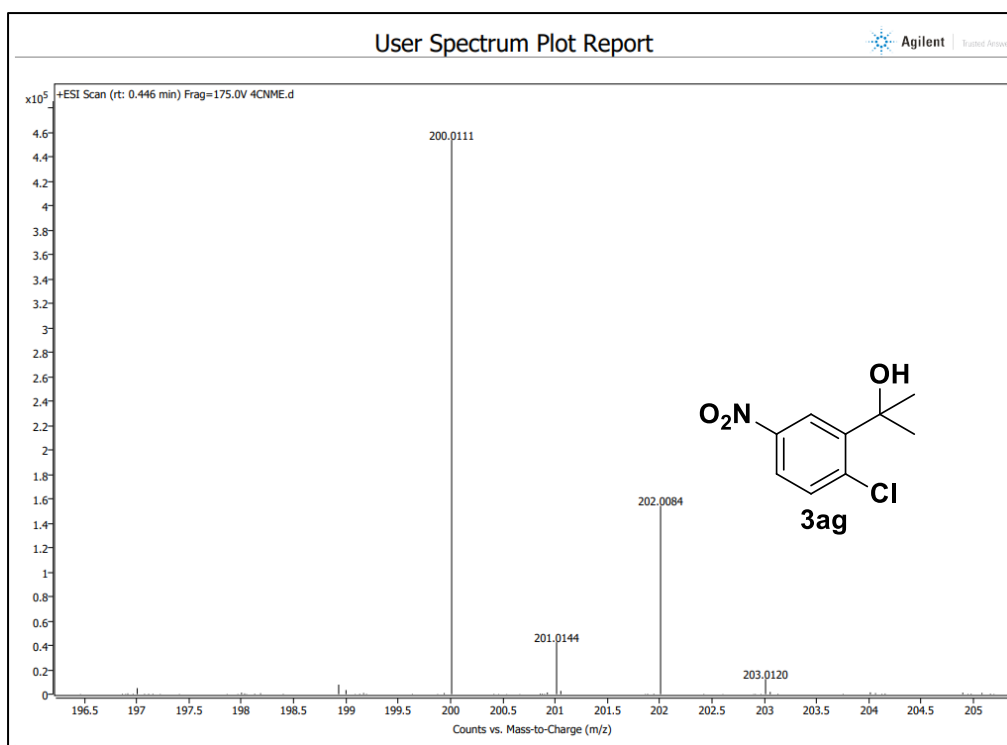

**Figure S35: HR-MS Spectrum of 3ag.**

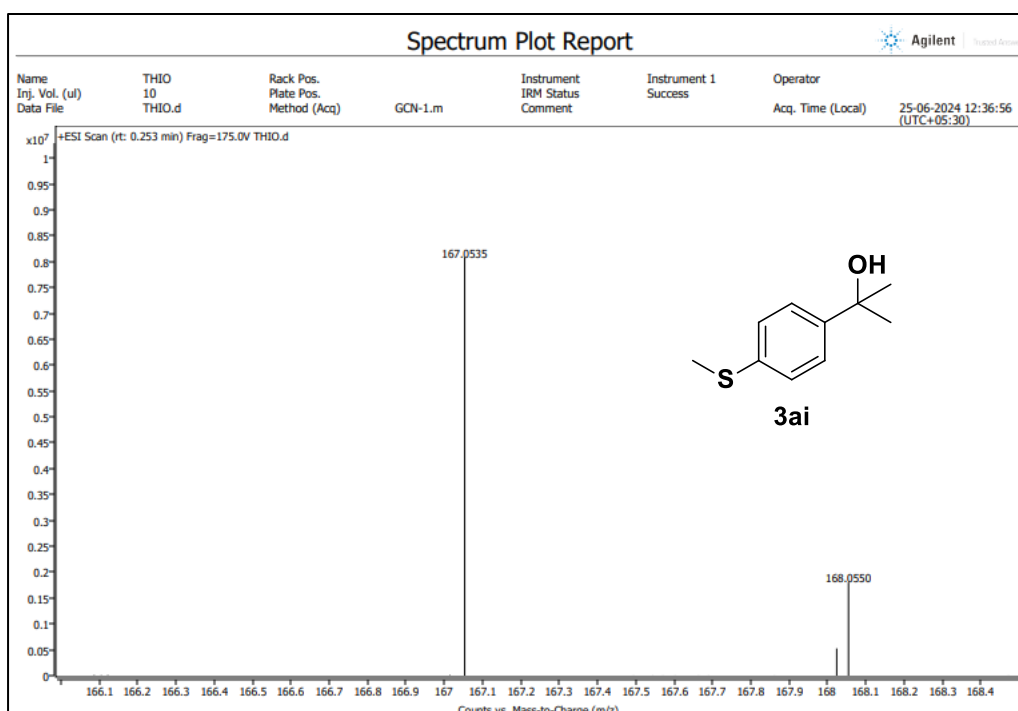

**Figure S36: HR-MS Spectrum of 3ai.**

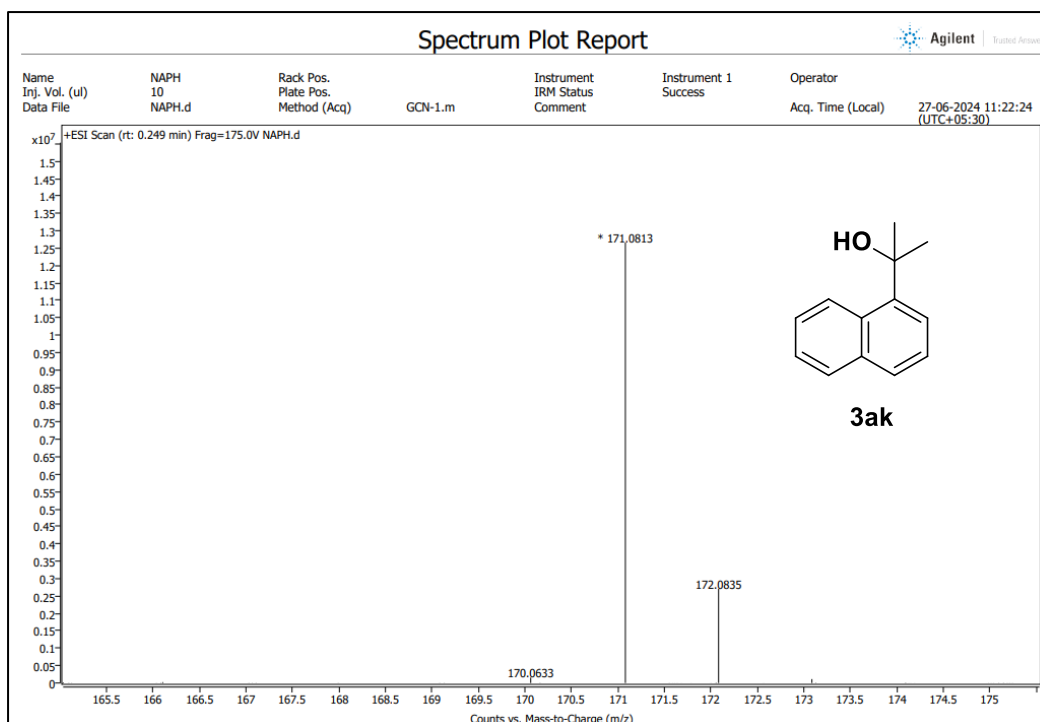

**Figure S37: HR-MS Spectrum of 3ak**

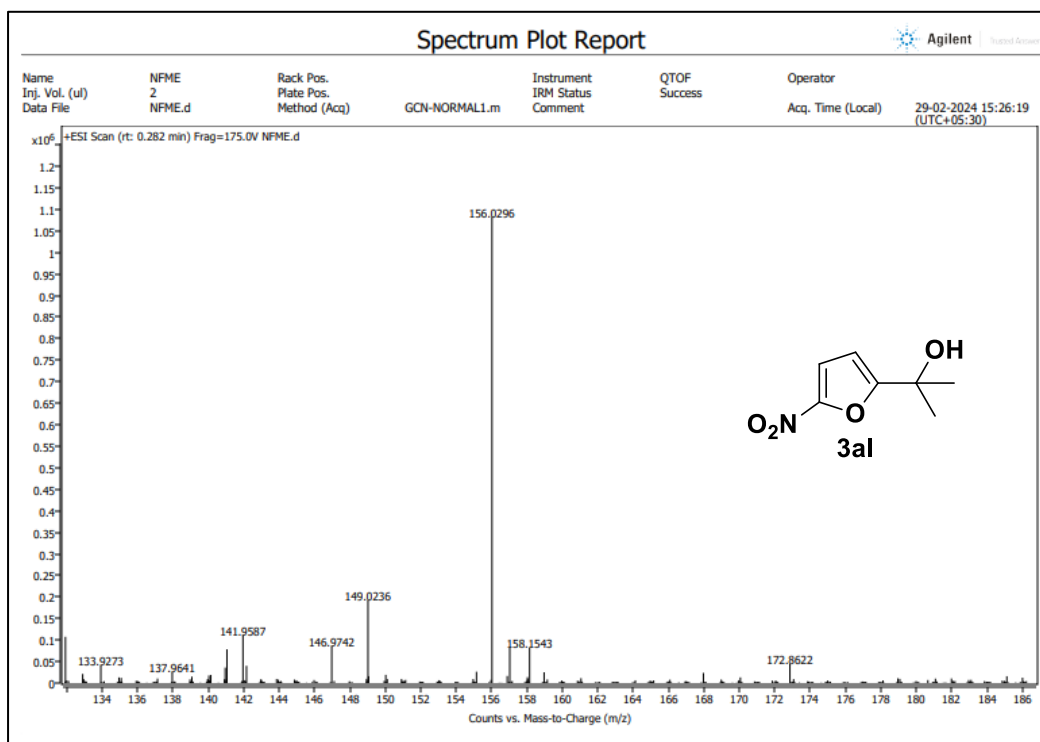

**Figure S38: HR-MS Spectrum of 3al.**

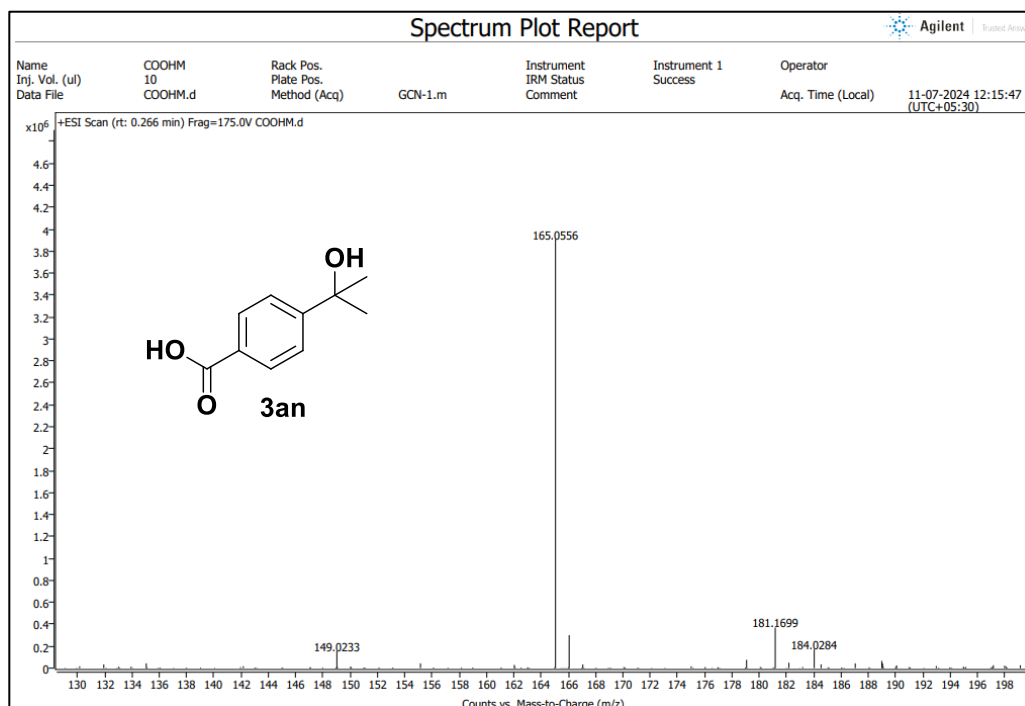

**Figure S39: HR-MS Spectrum of 3an.**

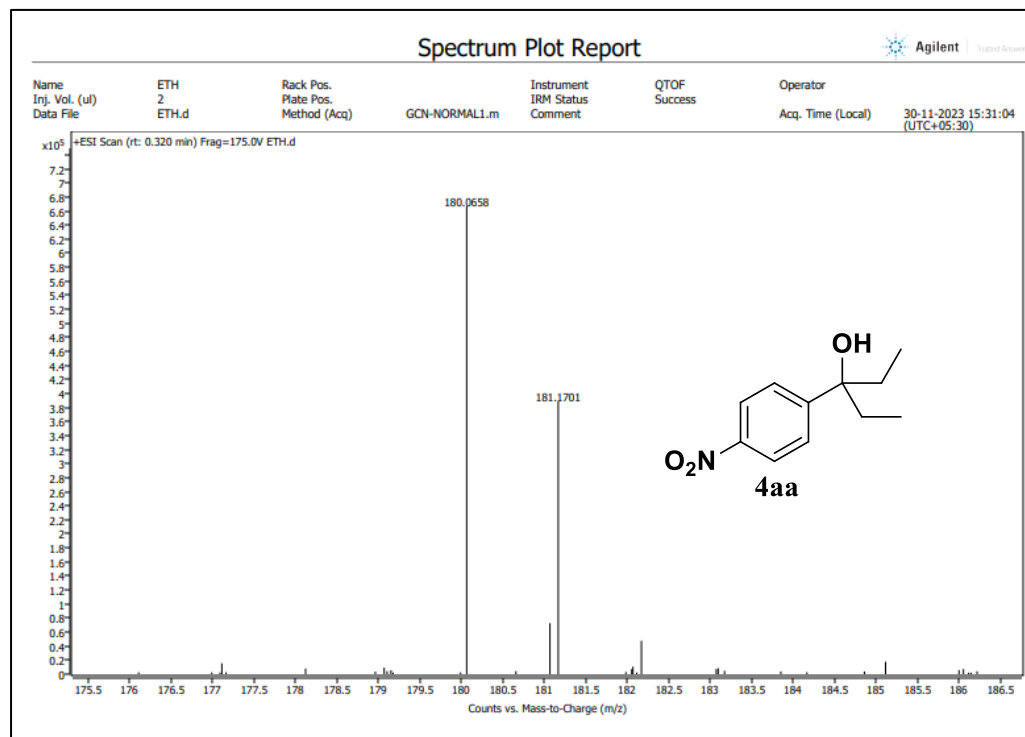

**Figure S40: HR-MS Spectrum of 4aa.**

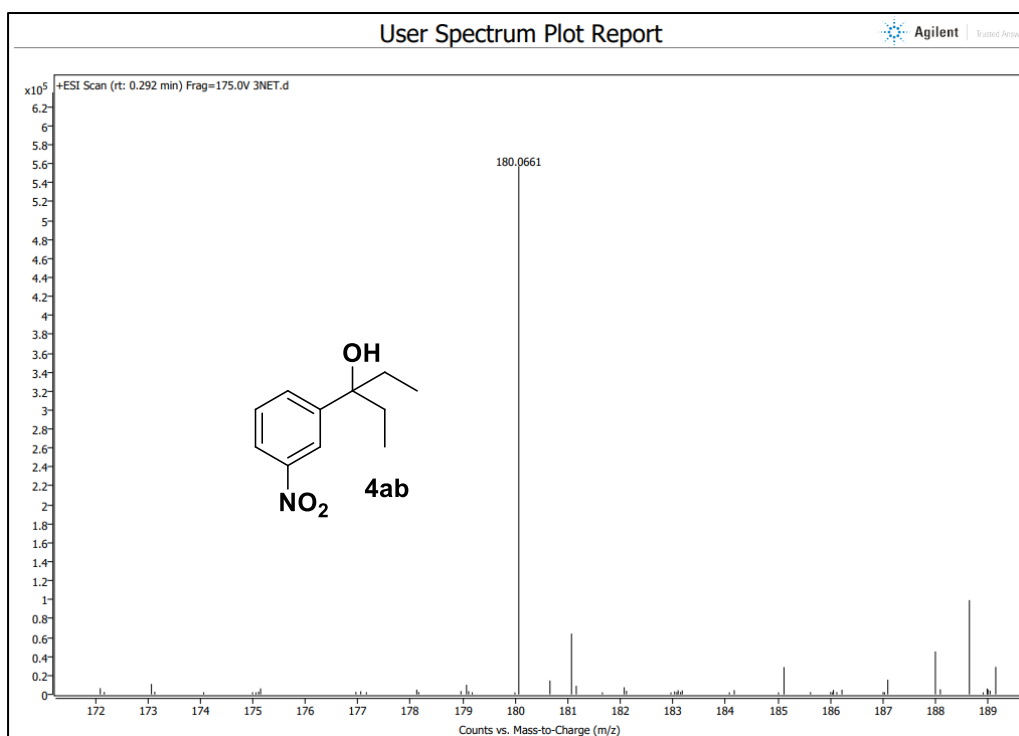

**Figure S41: HR-MS Spectrum of 4ab.**

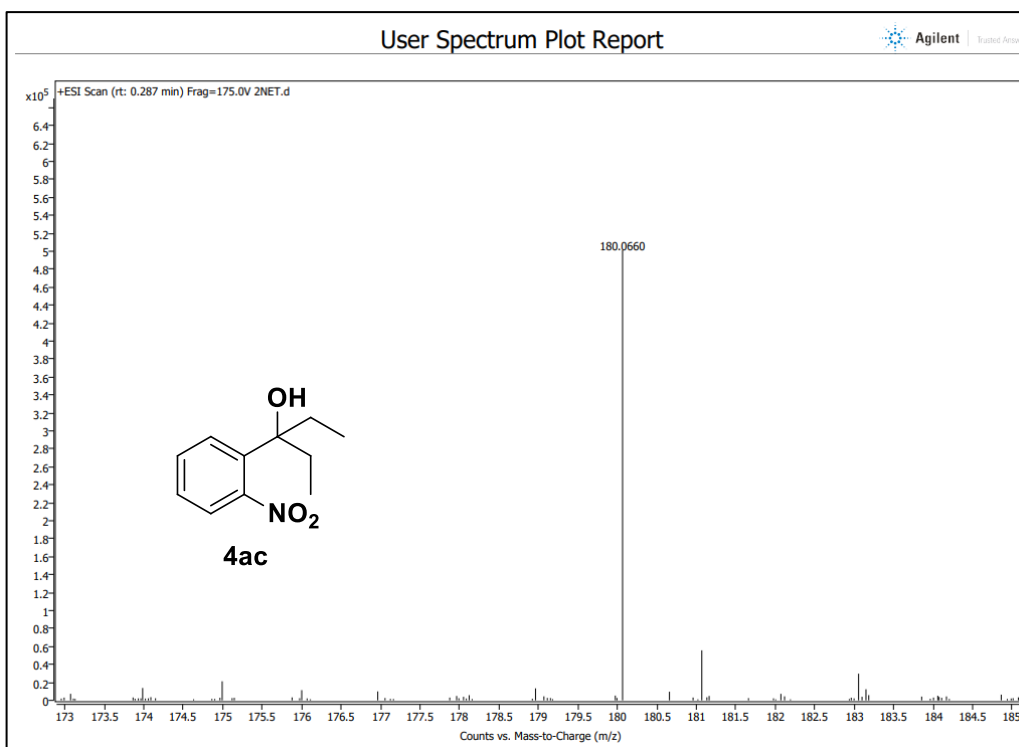

**Figure S42: HR-MS Spectrum of 4ac.**

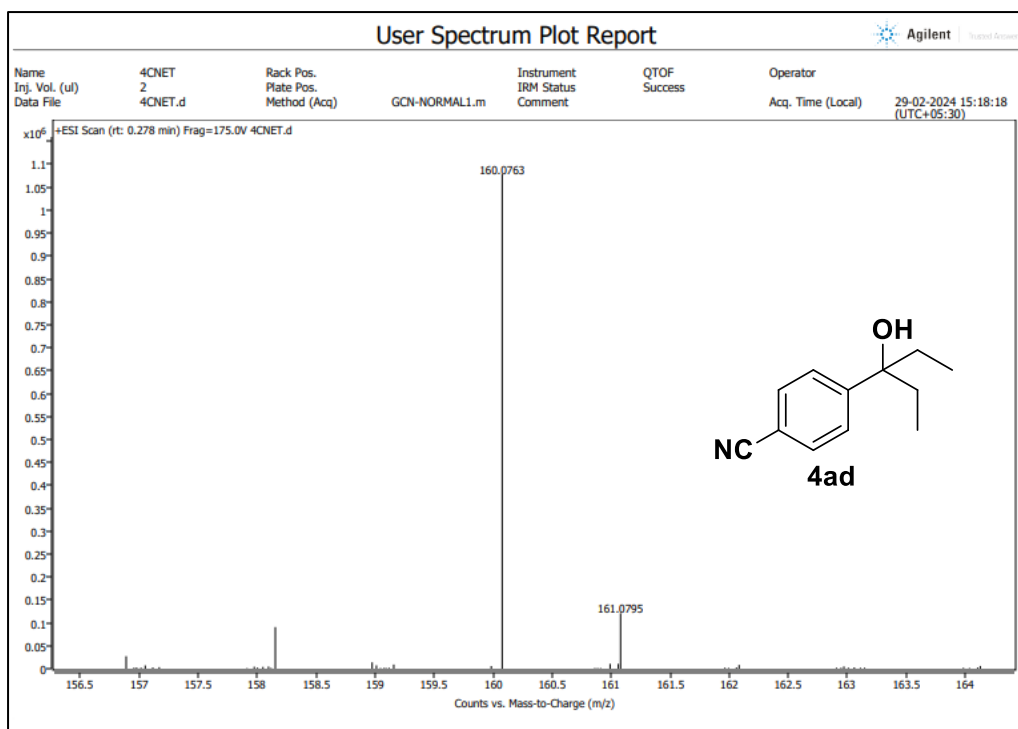

**Figure S43: HR-MS Spectrum of 4ad.**

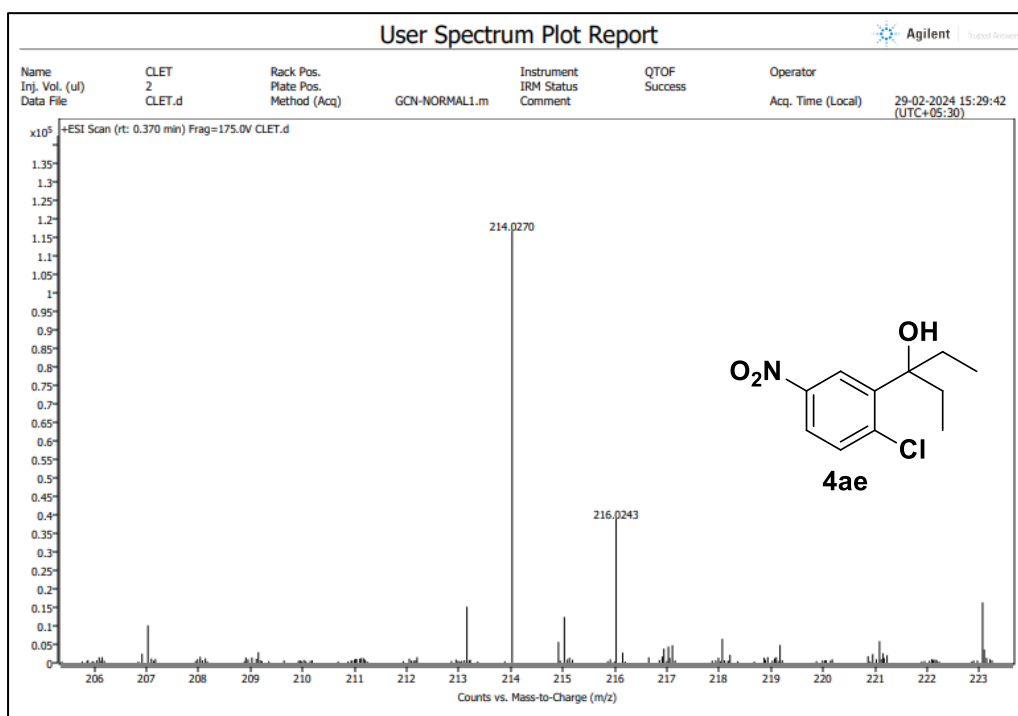

**Figure S44: HR-MS Spectrum of 4ae.**

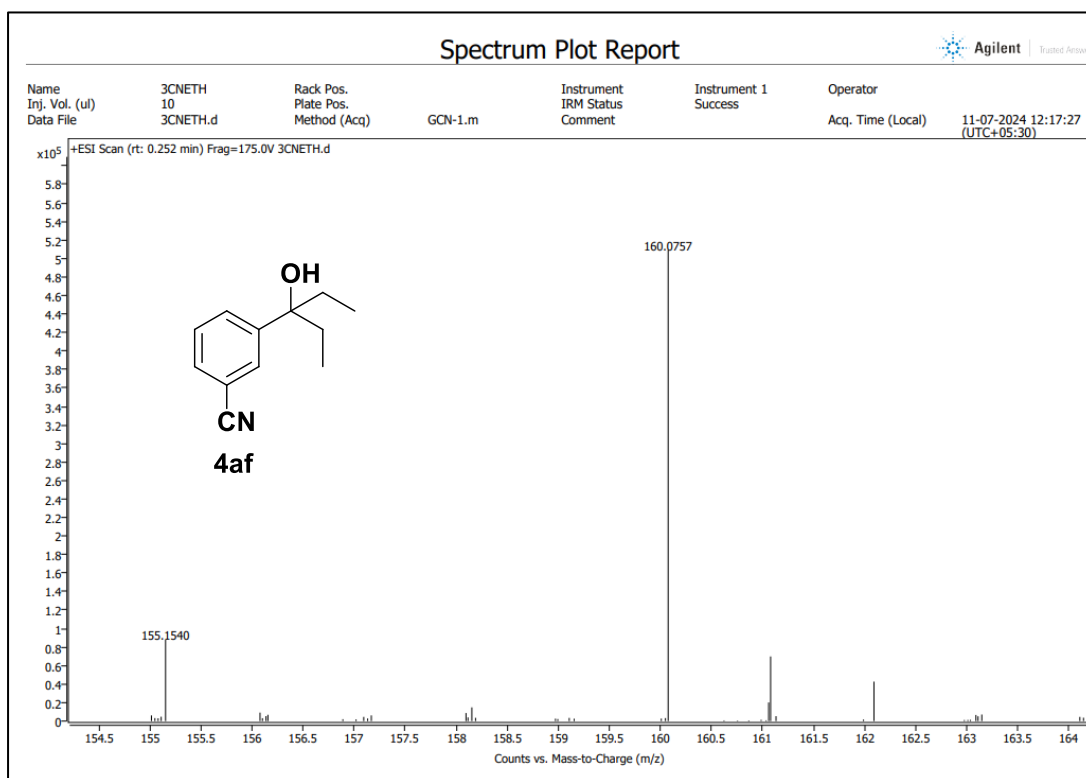

**Figure S45: HR-MS Spectrum of 4af.**

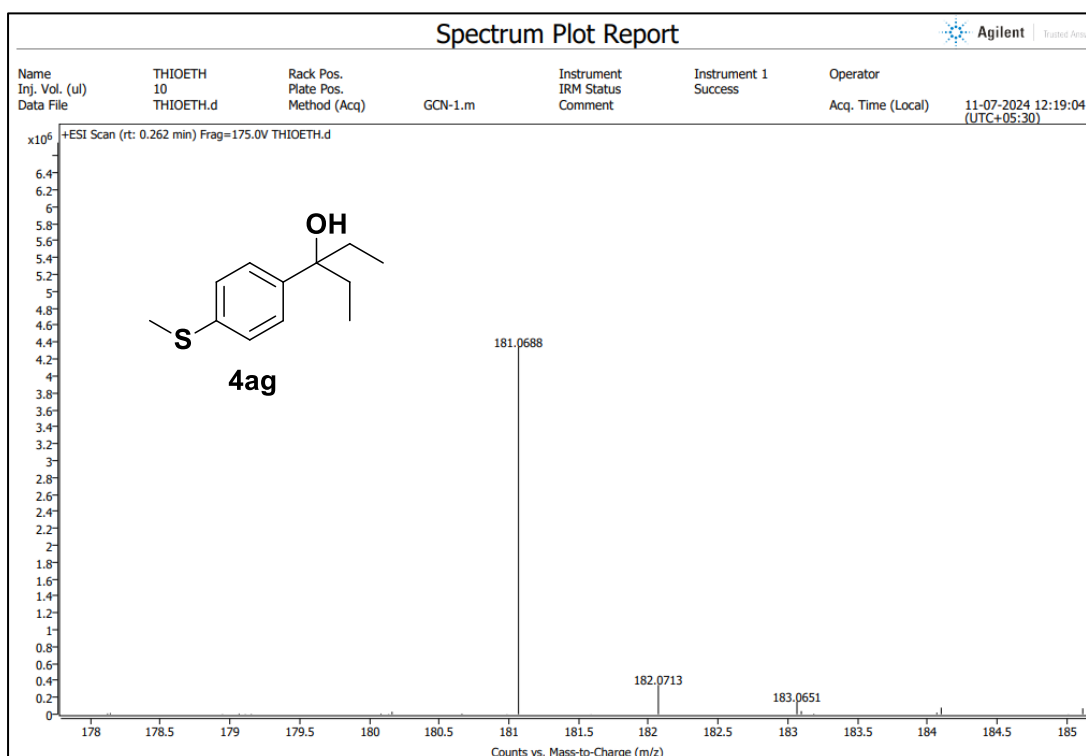

**Figure S46: HR-MS Spectrum of 4ag.**

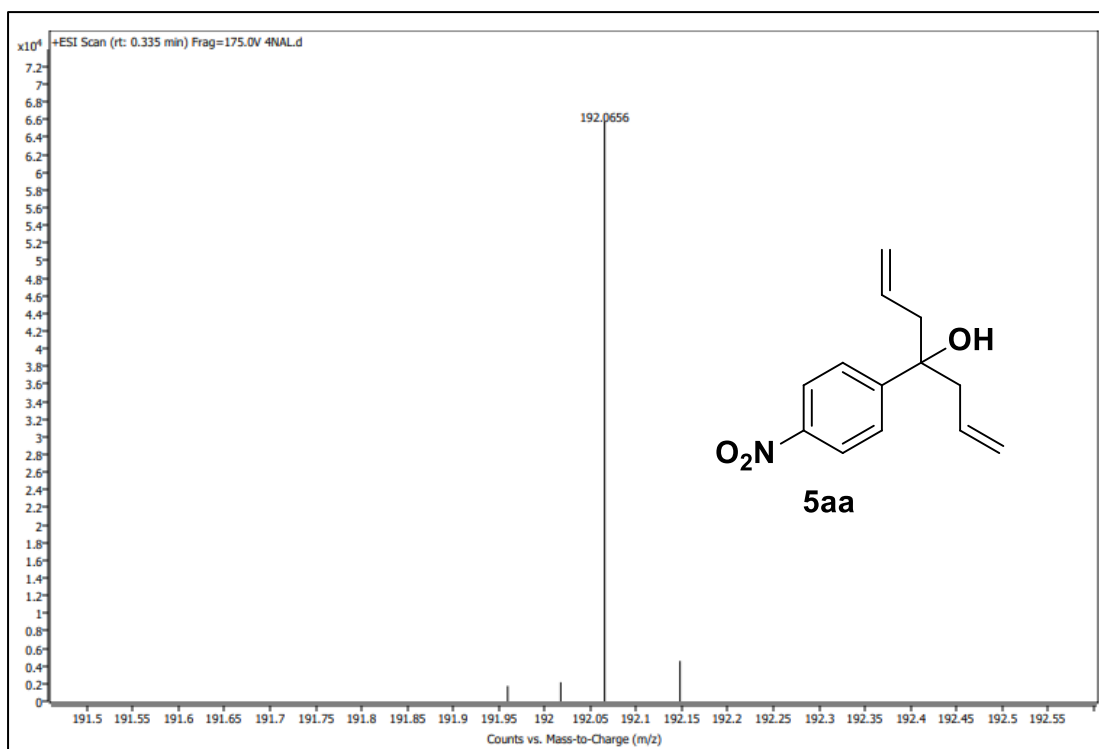

Figure S47: HR-MS Spectrum of 5aa.

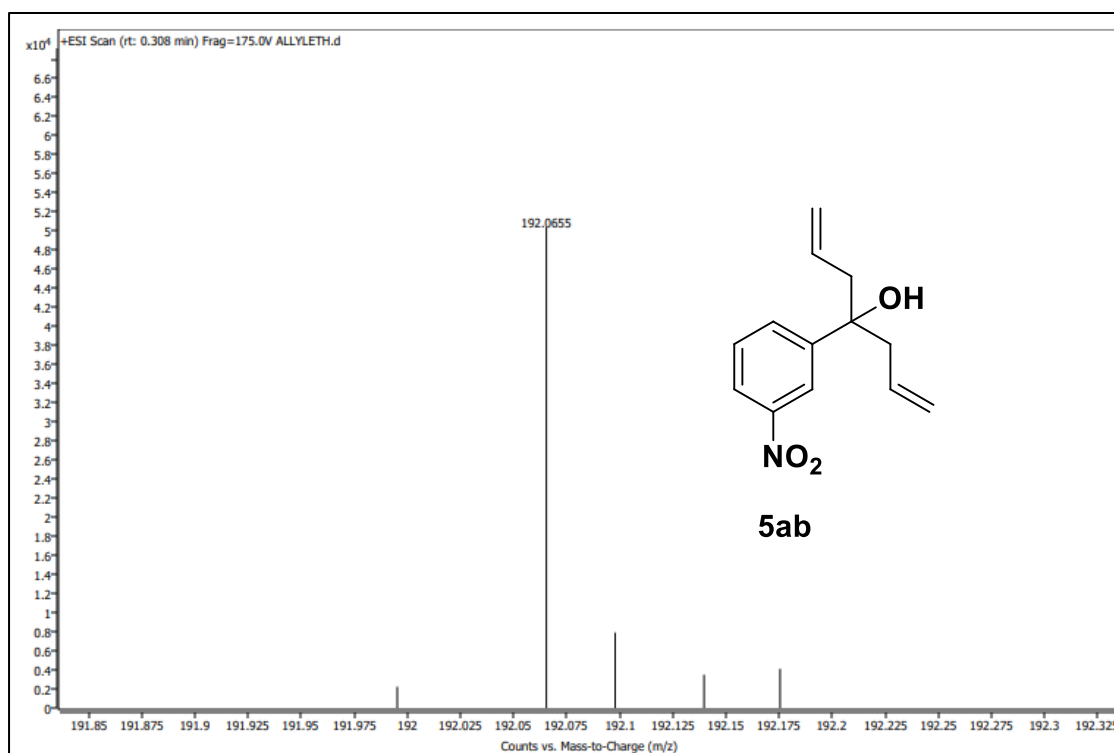

Figure S48: HR-MS Spectrum of 5ab.

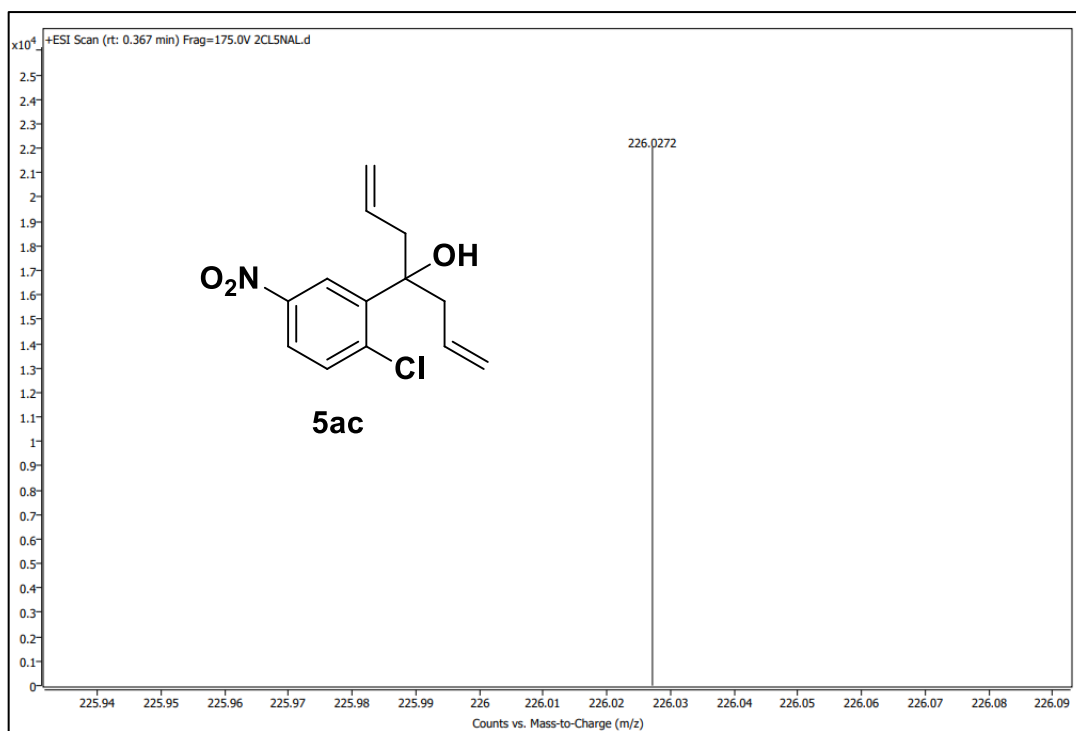

**Figure S49: HR-MS Spectrum of 5ac**

.

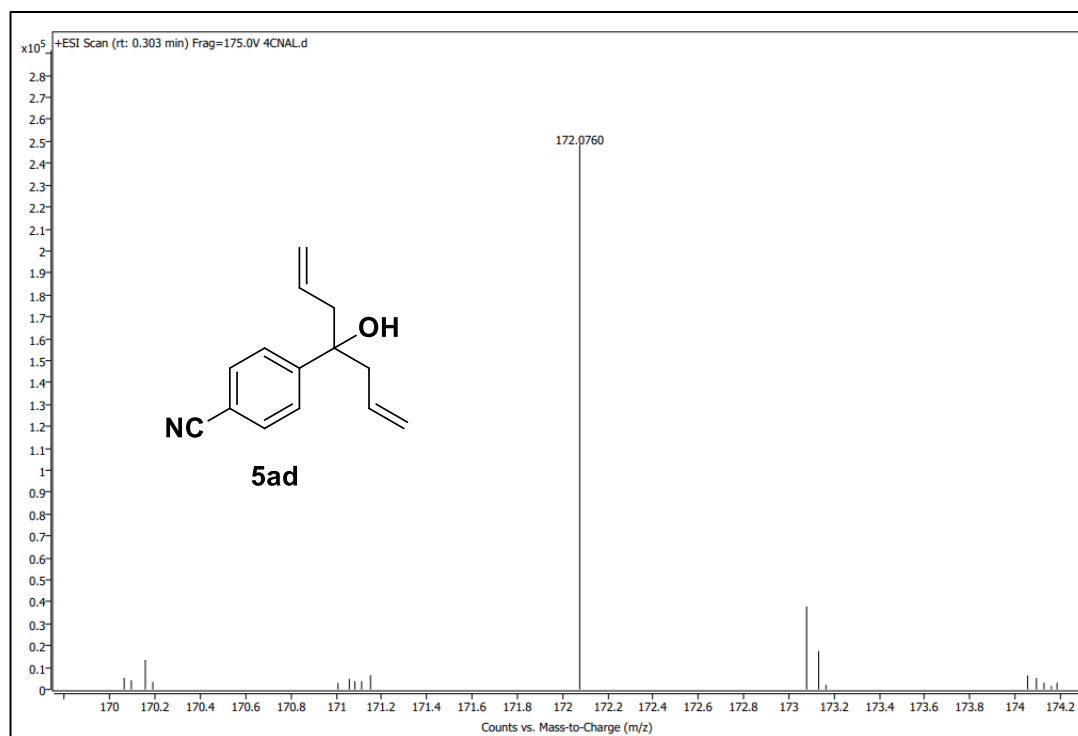

**Figure S50: HR-MS Spectrum of 5ad**



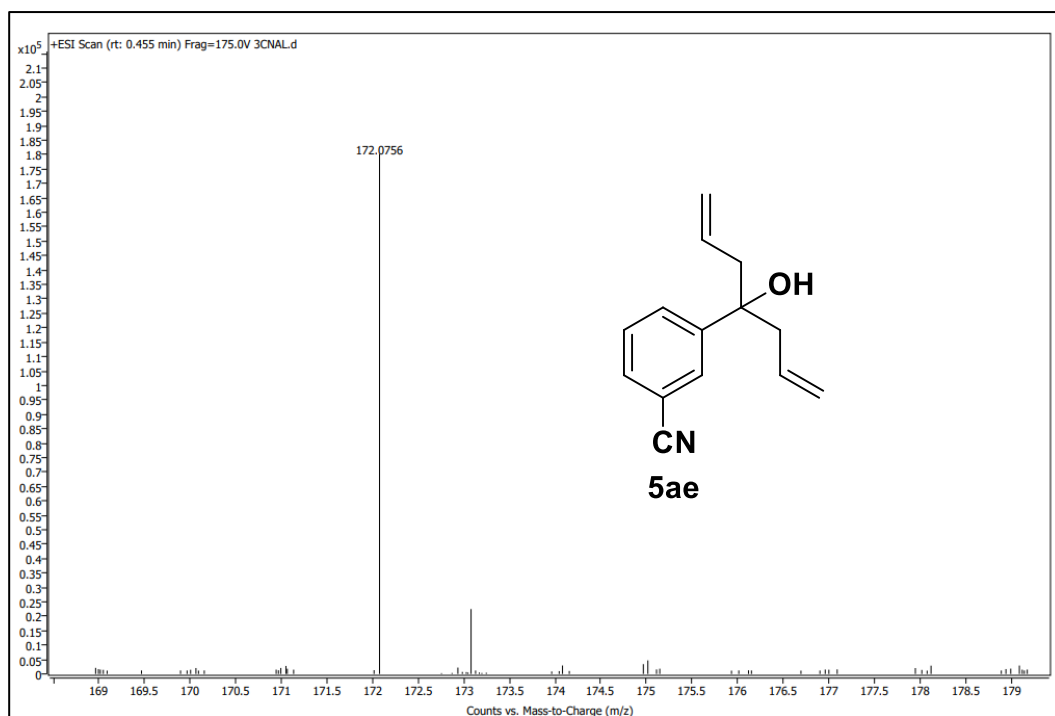

Figure S51: HR-MS Spectrum of 5ae.

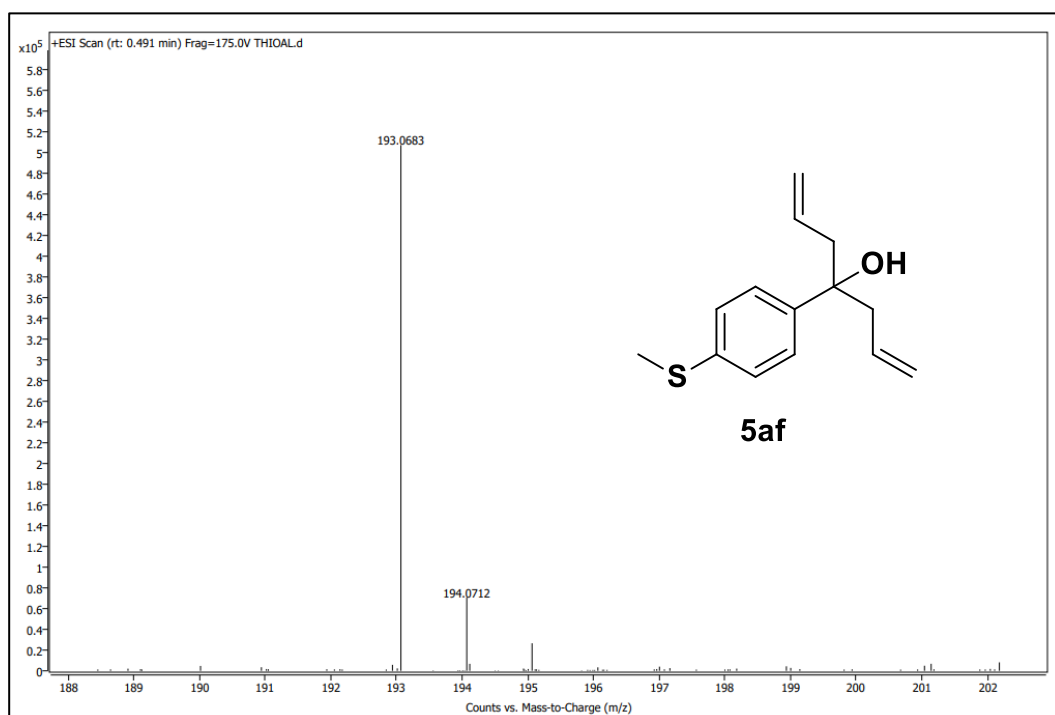

Figure S52: HR-MS Spectrum of 5af

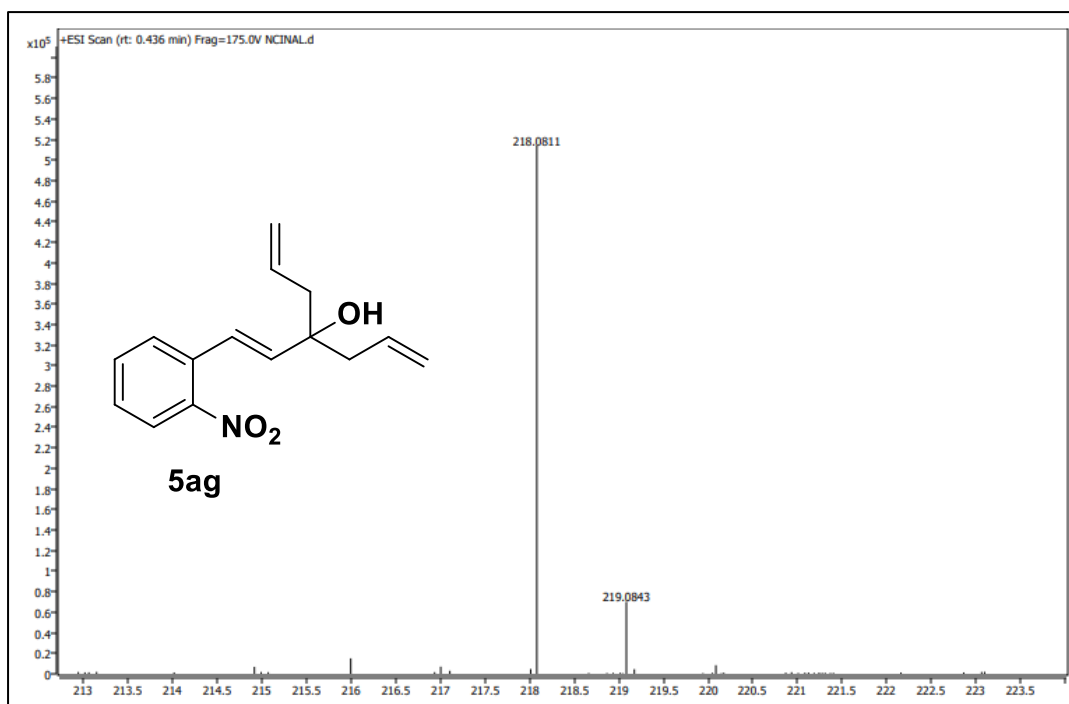

Figure S53: HR-MS Spectrum of 5ag.

## 11. Green Chemistry Metrics Calculation

### a) Atom Economy Calculation

Atom Economy = (Molecular weight of Desired Product/ $\Sigma$  Molecular weight of all the reagents) \*100

| <b>Considering Methanol as a Reagent</b> (Only stoichiometric amount of alcohol was considered for calculation) |                              |                                 |                             |              |
|-----------------------------------------------------------------------------------------------------------------|------------------------------|---------------------------------|-----------------------------|--------------|
| Compound                                                                                                        | Molecular weight of aldehyde | Molecular weight of alcohol * 2 | Molecular weight of product | Atom economy |
| <b>3aa</b>                                                                                                      | 151.12                       | 64.08                           | 181.1885                    | 84           |
| <b>3ab</b>                                                                                                      | 151.12                       | 64.08                           | 181.1885                    | 84           |
| <b>3ac</b>                                                                                                      | 151.12                       | 64.08                           | 181.1885                    | 84           |
| <b>3ad</b>                                                                                                      | 177.16                       | 64.08                           | 207.2258                    | 86           |
| <b>3ae</b>                                                                                                      | 131.13                       | 64.08                           | 161.2004                    | 83           |
| <b>3af</b>                                                                                                      | 131.13                       | 64.08                           | 161.2004                    | 83           |
| <b>3ag</b>                                                                                                      | 185.56                       | 64.08                           | 215.6336                    | 86           |
| <b>3ai</b>                                                                                                      | 152.21                       | 64.08                           | 182.2826                    | 84           |
| <b>3ak</b>                                                                                                      | 156.18                       | 64.08                           | 186.2497                    | 85           |
| <b>3al</b>                                                                                                      | 141.082                      | 64.08                           | 171.1507                    | 83           |
| <b>3an</b>                                                                                                      | 150.133                      | 64.08                           | 180.2005                    | 84           |
| <b>4aa</b>                                                                                                      | 151.12                       | 92.136                          | 209.2417                    | 86           |
| <b>4ab</b>                                                                                                      | 151.12                       | 92.136                          | 209.2417                    | 86           |
| <b>4ac</b>                                                                                                      | 151.12                       | 92.136                          | 209.2417                    | 86           |
| <b>4ad</b>                                                                                                      | 131.13                       | 92.136                          | 189.2536                    | 85           |
| <b>4ae</b>                                                                                                      | 185.56                       | 92.136                          | 243.6868                    | 88           |
| <b>4af</b>                                                                                                      | 131.13                       | 92.136                          | 189.2536                    | 85           |
| <b>4ag</b>                                                                                                      | 152.21                       | 92.136                          | 210.3357                    | 86           |
| <b>5aa</b>                                                                                                      | 151.12                       | 116.16                          | 233.2631                    | 87           |
| <b>5ab</b>                                                                                                      | 151.12                       | 116.16                          | 233.2631                    | 87           |
| <b>5ac</b>                                                                                                      | 185.56                       | 116.16                          | 267.7082                    | 89           |
| <b>5ad</b>                                                                                                      | 131.13                       | 116.16                          | 213.2750                    | 86           |
| <b>5ae</b>                                                                                                      | 131.13                       | 116.16                          | 213.2750                    | 86           |
| <b>5af</b>                                                                                                      | 152.21                       | 116.16                          | 234.3571                    | 87           |
| <b>5ag</b>                                                                                                      | 177.16                       | 116.16                          | 259.3004                    | 88           |

**Table S1: Atom economy calculation of products**

### b) Process Mass Intensity Calculation (PMI)

PMI = Total mass used in the synthesis (Kg) / Mass of product (Kg)

Solvents used for the separation are excluded from calculations due to their recyclability.

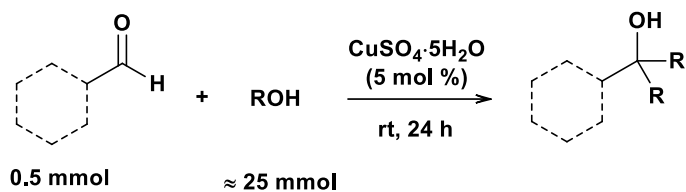

Mass of alcohol = Density \* Volume (1 ml)

| Compound | Mass of aldehyde (0.5 mmol) | Mass of alcohol (25 mmol) | Mass of catalyst (0.025 mmol) | Mass of silica (≈20 g) | Mass of product | PMI |
|----------|-----------------------------|---------------------------|-------------------------------|------------------------|-----------------|-----|
| 3aa      | 7.556E-05                   | 0.00079                   | 6.225E-06                     | 0.02                   | 0.000082        | 255 |
| 3ab      | 7.556E-05                   | 0.00079                   | 6.225E-06                     | 0.02                   | 0.000085        | 246 |
| 3ac      | 7.556E-05                   | 0.00079                   | 6.225E-06                     | 0.02                   | 0.000075        | 278 |
| 3ad      | 8.858E-05                   | 0.00079                   | 6.225E-06                     | 0.02                   | 0.000075        | 278 |
| 3ae      | 6.557E-05                   | 0.00079                   | 6.225E-06                     | 0.02                   | 0.000062        | 337 |
| 3af      | 6.557E-05                   | 0.00079                   | 6.225E-06                     | 0.02                   | 0.000065        | 321 |
| 3ag      | 9.278E-05                   | 0.00079                   | 6.225E-06                     | 0.02                   | 0.000074        | 282 |
| 3ai      | 7.611E-05                   | 0.00079                   | 6.225E-06                     | 0.02                   | 0.000071        | 294 |
| 3ak      | 7.809E-05                   | 0.00079                   | 6.225E-06                     | 0.02                   | 0.000056        | 373 |
| 3al      | 7.054E-05                   | 0.00079                   | 6.225E-06                     | 0.02                   | 0.000046        | 454 |
| 3an      | 7.507E-05                   | 0.00079                   | 6.225E-06                     | 0.02                   | 0.000059        | 354 |
| 4aa      | 7.556E-05                   | 0.00079                   | 6.225E-06                     | 0.02                   | 0.000093        | 224 |
| 4ab      | 7.556E-05                   | 0.00079                   | 6.225E-06                     | 0.02                   | 0.000095        | 220 |
| 4ac      | 7.556E-05                   | 0.00079                   | 6.225E-06                     | 0.02                   | 0.000045        | 464 |
| 4ad      | 6.557E-05                   | 0.00079                   | 6.225E-06                     | 0.02                   | 0.000057        | 366 |
| 4ae      | 9.278E-05                   | 0.00079                   | 6.225E-06                     | 0.02                   | 0.000049        | 426 |
| 4af      | 6.557E-05                   | 0.00079                   | 6.225E-06                     | 0.02                   | 0.000059        | 354 |
| 4ag      | 7.611E-05                   | 0.00079                   | 6.225E-06                     | 0.02                   | 0.000051        | 409 |
| 5aa      | 7.556E-05                   | 0.00085                   | 6.225E-06                     | 0.02                   | 0.000108        | 194 |
| 5ab      | 7.556E-05                   | 0.00085                   | 6.225E-06                     | 0.02                   | 0.0001          | 209 |
| 5ac      | 9.278E-05                   | 0.00085                   | 6.225E-06                     | 0.02                   | 0.000054        | 388 |
| 5ad      | 6.557E-05                   | 0.00085                   | 6.225E-06                     | 0.02                   | 0.000064        | 327 |
| 5ae      | 6.557E-05                   | 0.00085                   | 6.225E-06                     | 0.02                   | 0.000048        | 436 |
| 5af      | 7.611E-05                   | 0.00085                   | 6.225E-06                     | 0.02                   | 0.000082        | 255 |
| 5ag      | 8.858E-05                   | 0.00085                   | 6.225E-06                     | 0.02                   | 0.000078        | 269 |

**Table S2: Process Mass Intensity calculation of products**

| Entry | Substrate                                                                          | Catalytic condition                                                                                                                             | Temperature | Yield (%) | Atom economy | References |
|-------|------------------------------------------------------------------------------------|-------------------------------------------------------------------------------------------------------------------------------------------------|-------------|-----------|--------------|------------|
| 1     | 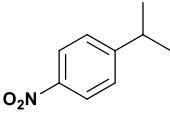  | Blue light, $\text{UO}_2^{2+}$ ,<br>MeOH (1 ml), $\text{O}_2$<br>(1 atm), 30 h                                                                  | rt          | 60        | 92           | 24b        |
| 2     |   | $\text{O}_2$ (1.8 MPa),<br>NaOH (4.5 M),<br>EtOH/ $\text{H}_2\text{O}$ , 24 h                                                                   | 60 °C       | 76        | 92           | 24c        |
| 3     |   | <i>cis</i> -[Ru(dtbpv) $_2$ Cl $_2$ ]<br>(5 mol %), $\text{H}_5\text{IO}_6$ ,<br>CF $_3$ SO $_3$ H,<br>AcOH/ $\text{H}_2\text{O}$ (1:1), 4<br>h | rt          | 92        | 46           | 24a        |
| 4     |  | CuSO $_4$ . $\text{H}_2\text{O}$ (5 mol<br>%), MeOH, 24 h                                                                                       | rt          | 90        | 84           | this work  |

**Table S3: Literature comparison of AE of 3aa with present work.**
